# Supplementary material for: Piperic acid derivative as a molecular modulator to accelerate the IAPP aggregation process and alter its antimicrobial activity
Source: Royal Society of Chemistry journal article supplement (doi:10.1039/d3cc03363e), 2023-01-01

## Supporting Information

### Piperic acid derivative as a molecular modulator to accelerate IAPP aggregation process and alter its antimicrobial activity

Ai-Ci Chan<sup>a</sup>, Pei-Ya Shan<sup>a</sup>, Men-Hsin Wu<sup>a</sup>, Pin-Han Lin<sup>b</sup>, Chang Shun Tsai<sup>a</sup>, Chia-Chien Hsu<sup>a</sup>, Ting-Hsiang Chiu<sup>d</sup>, Ting-Wei Hsu<sup>c</sup>, Yi-Cheun Yeh<sup>d</sup>, Yun-Ju Lai<sup>c\*</sup>, Wei-Min Liu<sup>b\*</sup>, and Ling-Hsien Tu<sup>a\*</sup>

<sup>a</sup> Department of Chemistry, National Taiwan Normal University, Taipei 116, Taiwan.

<sup>b</sup> Department of Chemistry, Fu Jen Catholic University, New Taipei City 242, Taiwan.

<sup>c</sup> Department of Life Science, National Taiwan Normal University, Taipei 116, Taiwan

<sup>d</sup> Institute of Polymer Science and Engineering, National Taiwan University, Taipei 106, Taiwan

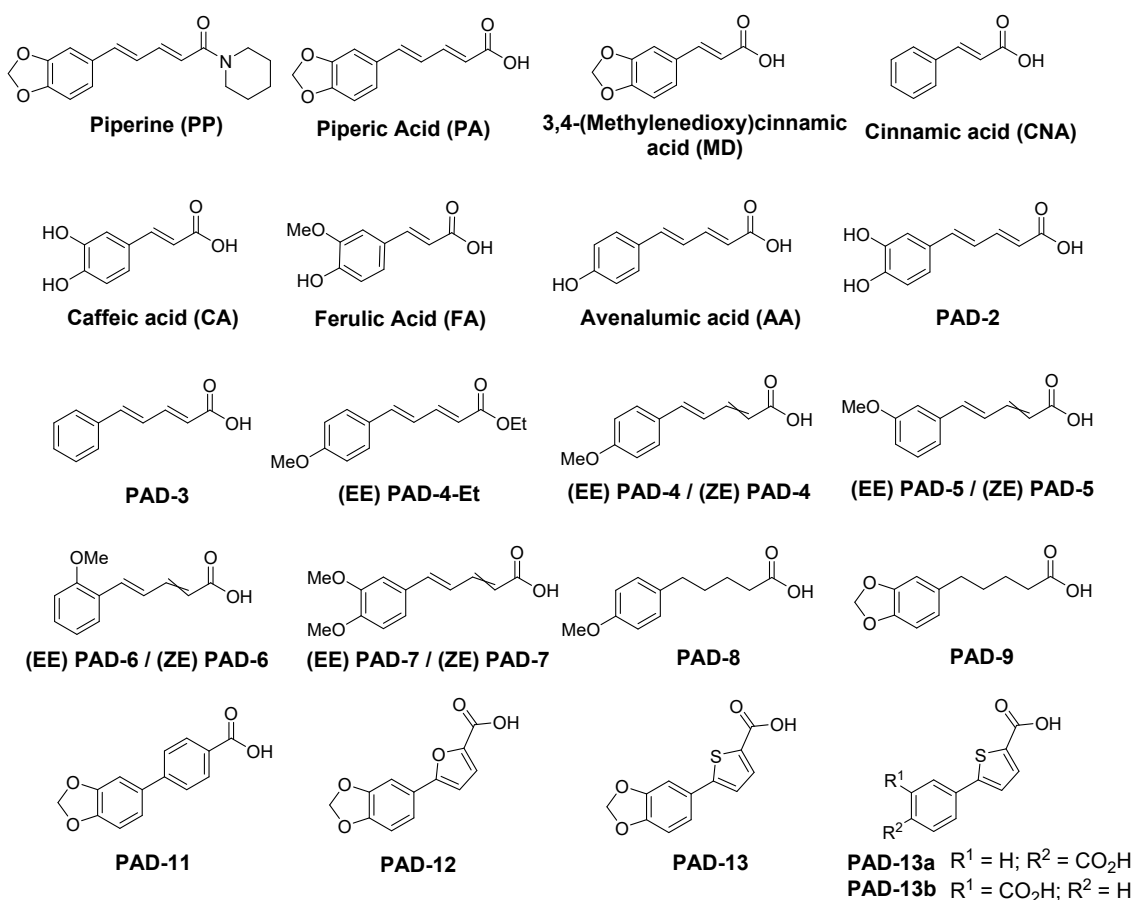

**Figure S1.** The structures of piperine and PA derivatives.

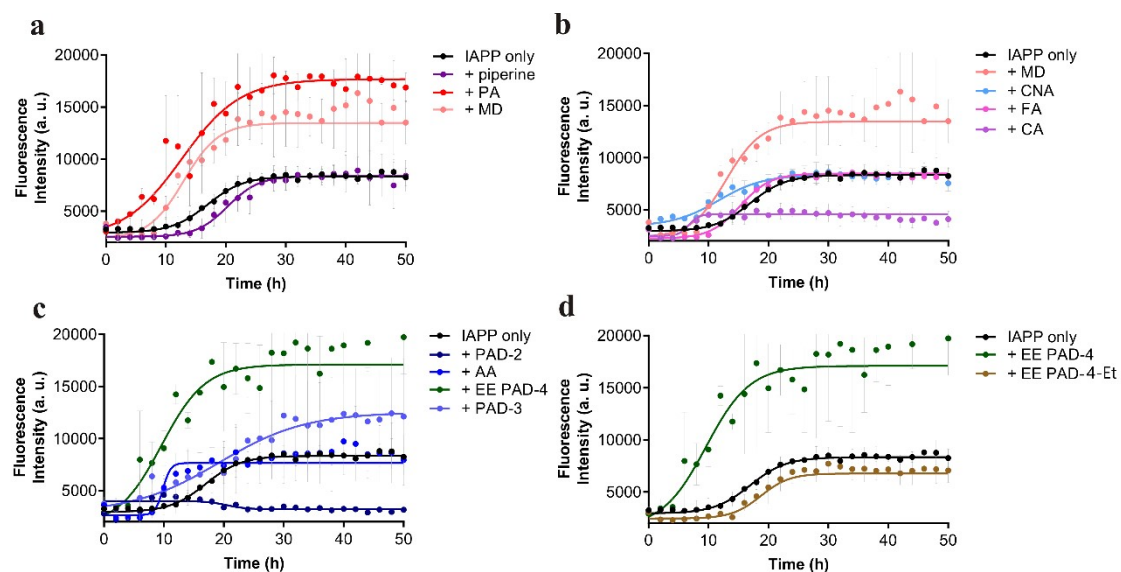

**Figure S2.** ThT monitored IAPP aggregation kinetics with PA derivatives including MD, CNA, FA, AA, PAD-2, PAD-3, EE PAD-4, and EE PAD-4-Et. The concentration of IAPP and all small molecules was fixed at 25  $\mu$ M and 500  $\mu$ M, respectively.

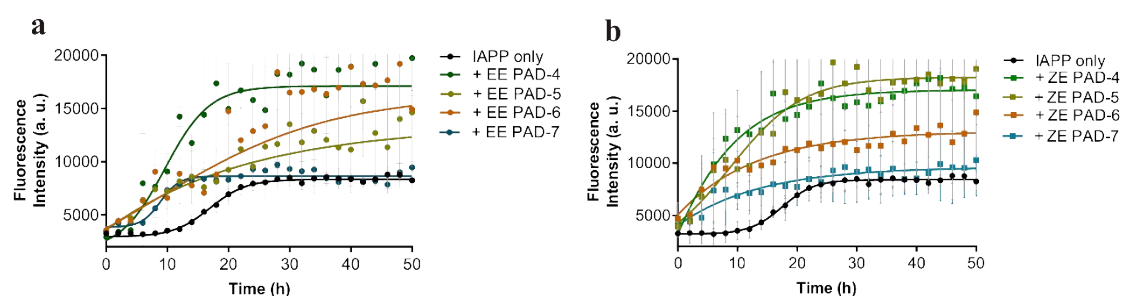

**Figure S3.** ThT monitored IAPP aggregation kinetics with PA derivatives including EE PAD-4~PAD-7 and ZE PAD-4~PAD-7. The concentration of IAPP and all small molecules was fixed at 25  $\mu$ M and 500  $\mu$ M, respectively.

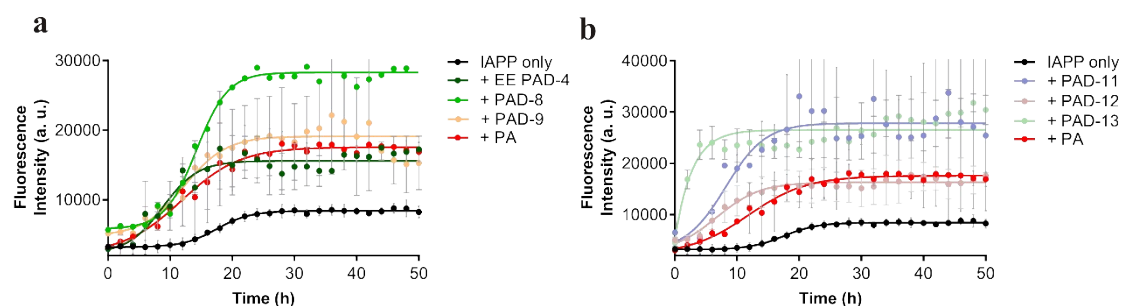

**Figure S4.** ThT monitored IAPP aggregation kinetics with PA derivatives including PA, EE PAD-4, PAD-8, PAD-9, and PAD 11~13. The concentration of IAPP and all small molecules was fixed at 25  $\mu$ M and 500  $\mu$ M, respectively.

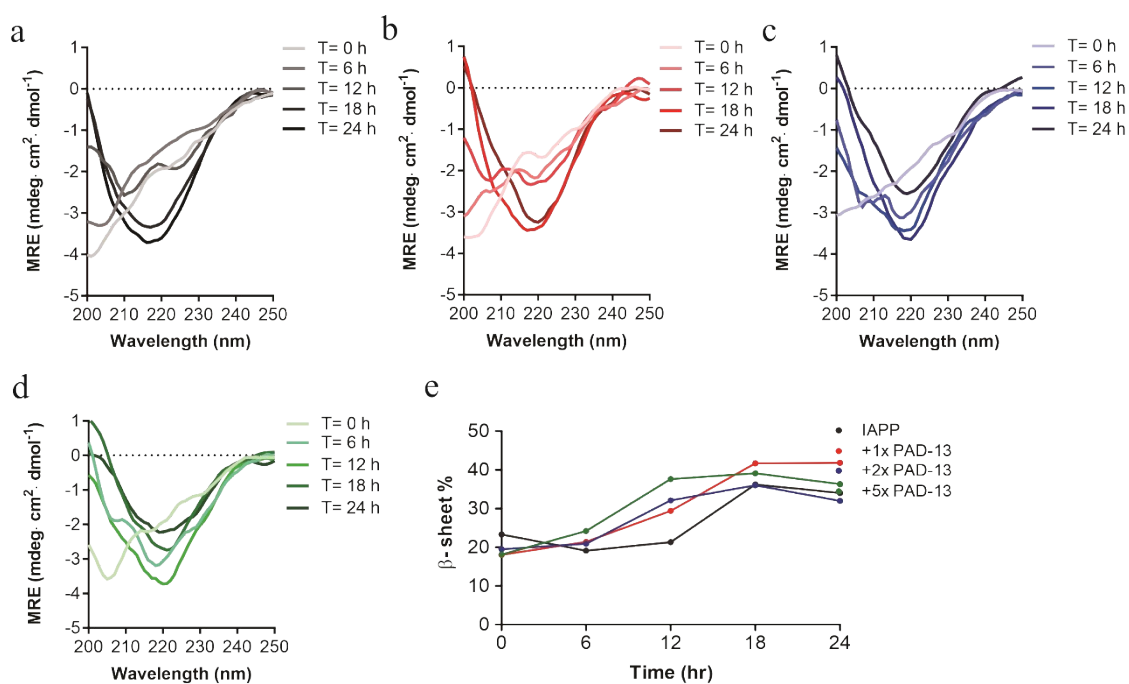

**Figure S5.** The conformational change of IAPP during aggregation. The CD spectra of (a) IAPP alone, (b) IAPP with 1-fold **PAD-13**, (c) IAPP with 2-fold excess **PAD-13**, and (d) IAPP with 5-fold excess **PAD-13** recorded after 0, 6, 12, 18, 24 h incubation. (e) The  $\beta$ -sheet component was estimated from each spectrum by the online software BeStSel.

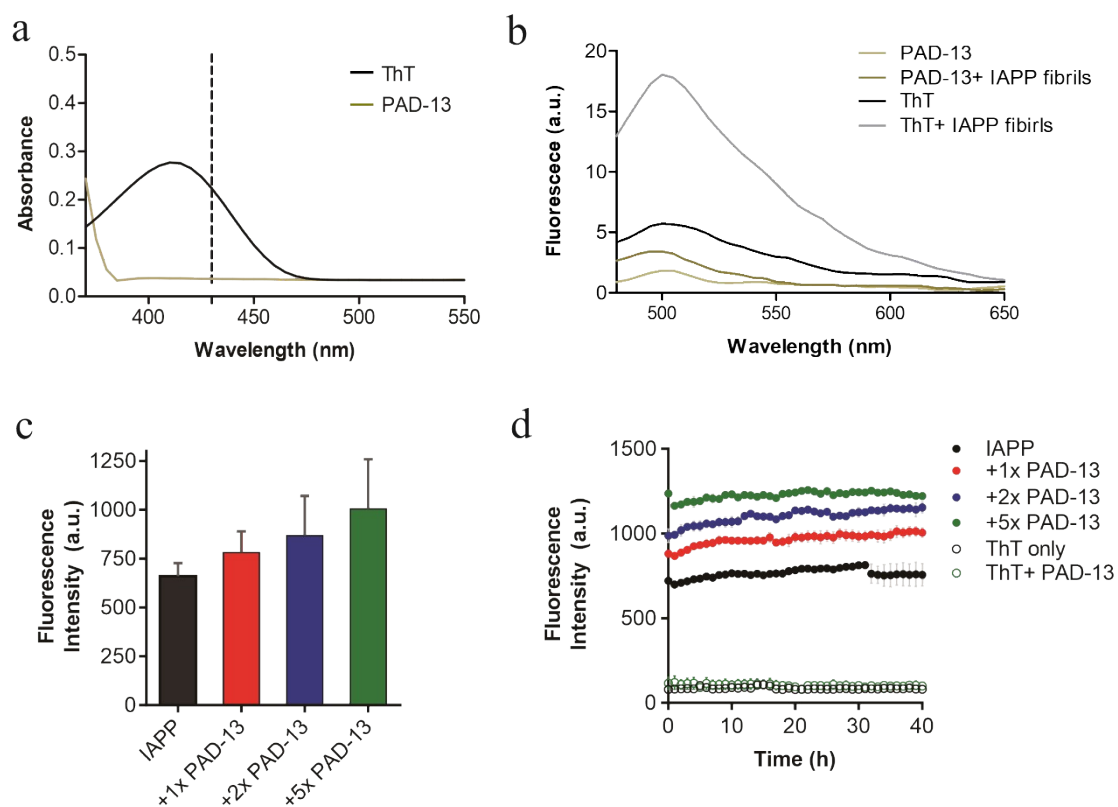

**Figure S6.** (a) The absorbance spectra of ThT and **PAD-13**. (b) The emission spectra of ThT and PAD-13 w/o IAPP fibrils. (c) The ThT fluorescence intensity of IAPP fibrils was measured immediately right after the addition of **PAD-13**. (d) The time course of ThT monitoring for IAPP fibrils with the presence of **PAD-13**. IAPP fibrils were prepared in advance by incubating IAPP solution in microtubes for 2 days with continuous shaking at 500 rpm.

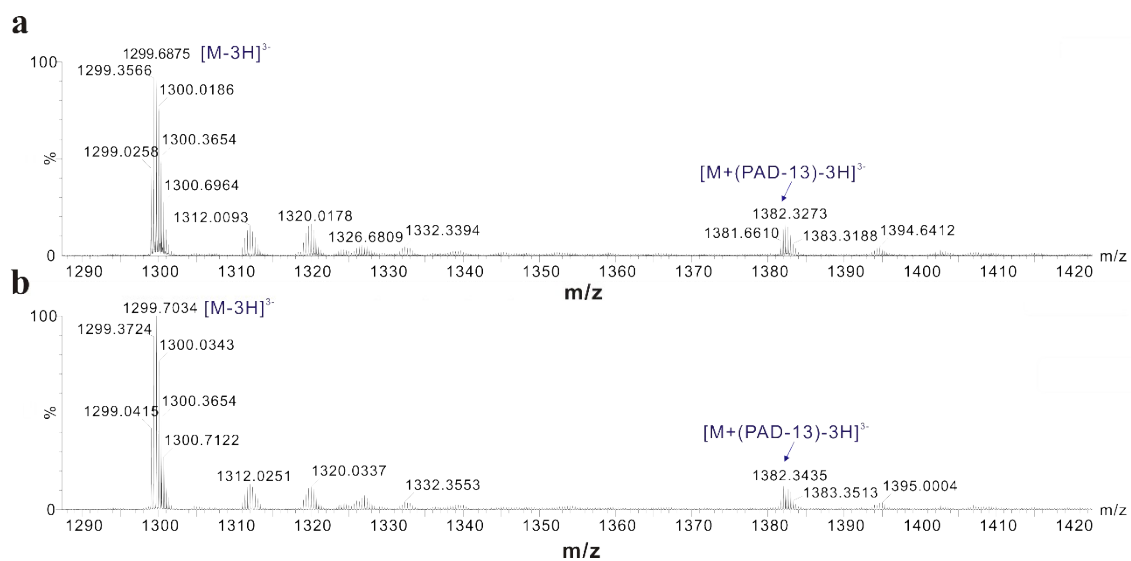

**Figure S7.** The mass spectra of IAPP with **PAD-13**. (a) Samples were incubated for 2 h before they were subjected to ESI-MS. (b) Samples were incubated for 4 h before they were subjected to ESI-MS.

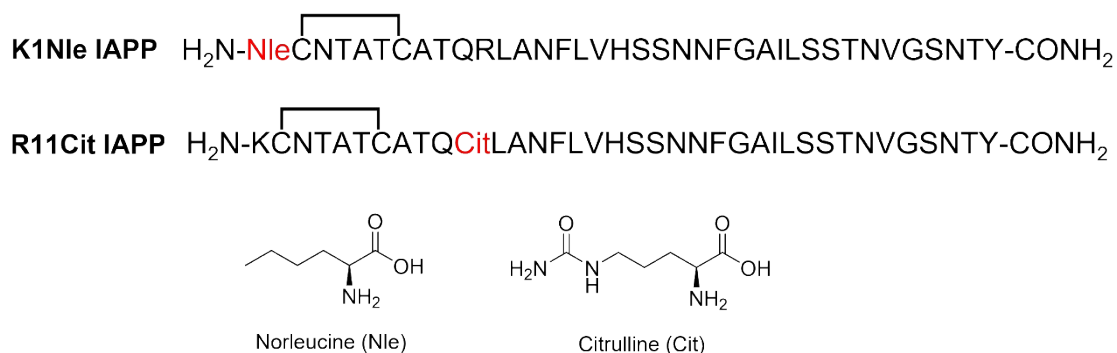

**Figure S8.** The primary sequence of K1Nle-IAPP and R11Cit-IAPP. The chemical structure of norleucine and citrulline.

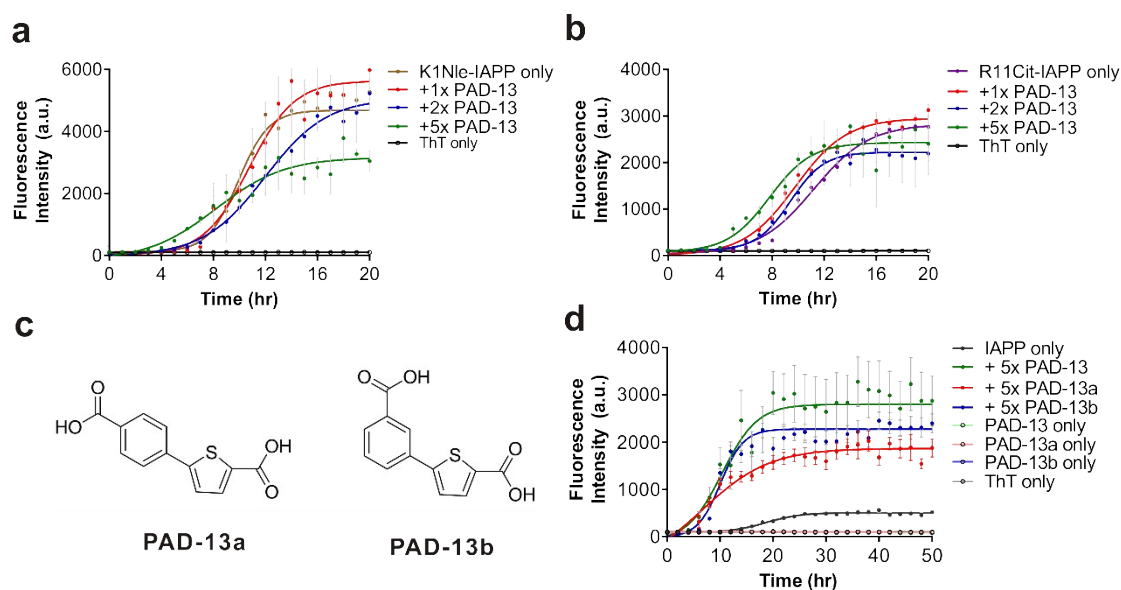

**Figure S9.** (a) The ThT kinetic studies for K1Nle-IAPP (brown) with 1-fold **PAD-13** (red), with 2-fold excess **PAD-13** (blue), and with 5-fold excess **PAD-13** (green). (b) The ThT kinetic studies for R11Cit-IAPP (purple) with 1-fold **PAD-13** (red), with 2-fold excess **PAD-13** (blue), and with 5-fold excess **PAD-13** (green). (c) The chemical structure of **PAD-13a** and **PAD-13b**. (d) The ThT kinetic studies for IAPP (black), with 5-fold excess **PAD-13** (green), **PAD-13a** (red), and **PAD-13b** (blue). IAPP and IAPP mutants were prepared at 30  $\mu$ M in 10 mM, pH 7.4, Tris buffer.

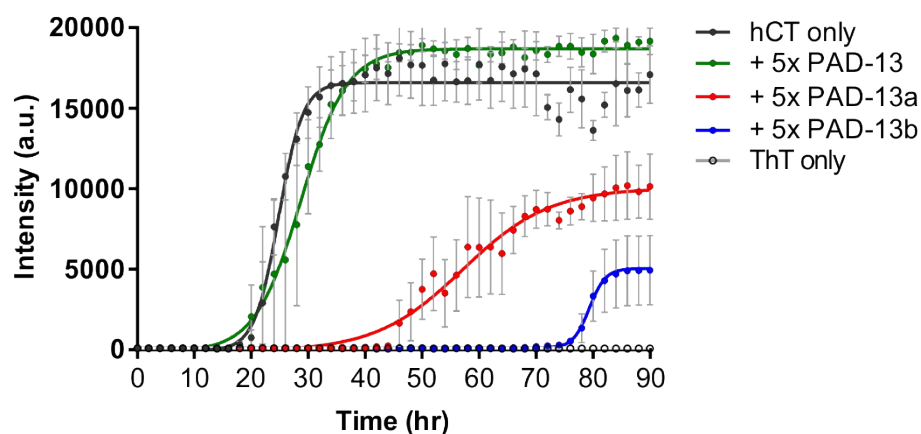

**Figure S10.** Time course of ThT fluorescence assay upon incubation of 64  $\mu$ M hCT in the absence (black curve) and presence of 5-fold excess **PAD-13** (green curve), **PAD-13a** (red curve), and **PAD-13b** (blue curve).

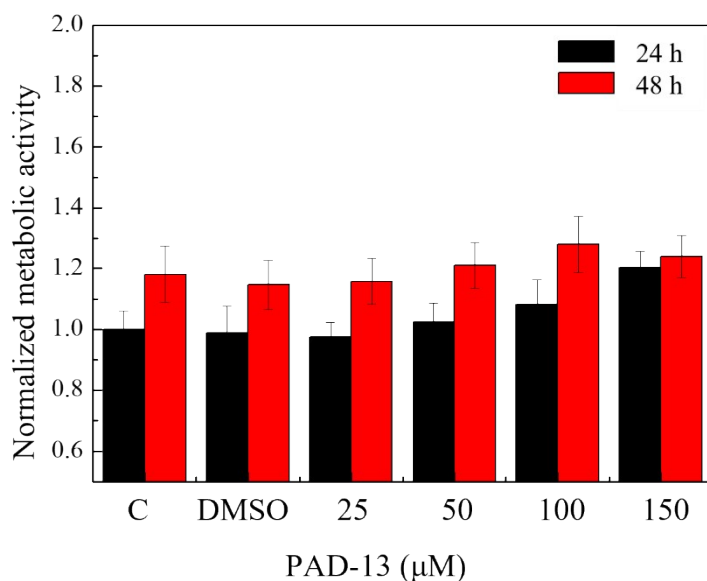

**Figure S11.** Cytocompatibility tests of **PAD-13** prepared at 25, 50, 100, and 150  $\mu\text{M}$  toward mouse embryonic fibroblasts (MEFs). All MEF cultures contain 1% DMSO. C represents a controlled study without **PAD-13** and DMSO. The metabolic activity of MEFs was determined using the alamarBlue assay after 24 h and 48 h incubation.

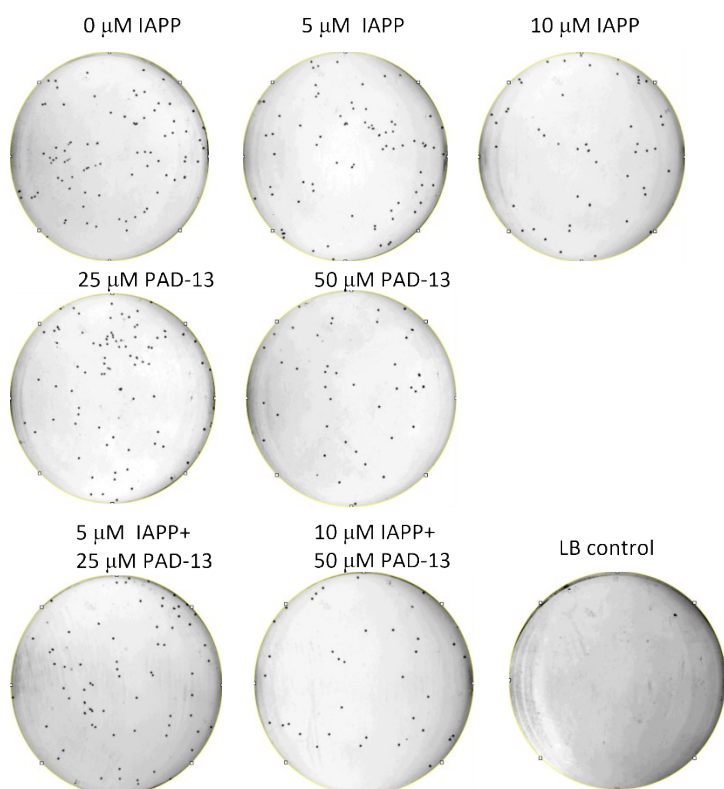

**Figure S12.** Representative images of colony formation assay.

## Experimental methods

**Peptide synthesis and purification.** The synthesis of IAPP and its analogs was carried out using 9-fluorenylmethoxycarbonyl (Fmoc) chemistry at a scale of 0.05 mmole with the assistance of the Liberty Lite microwave peptide synthesizer (CEM Corporation, USA). A low loading Rink Amide ProTide Resin (CEM Corporation, 0.18 mmole/g) was utilized to provide an amidated C-terminus after peptide cleavage. In each synthesis cycle, the carboxylic group of the Fmoc-protected amino acid was activated using diisopropylcarbodiimide. The Fmoc group was removed using a solution of 10% piperazine (w/v) in a mixture of ethanol and N-methyl pyrrolidone (10:90). To facilitate the synthesis, Fmoc-protected pseudoproline dipeptide derivatives were incorporated at positions 8-9 and 27-28. Double coupling was employed for  $\beta$ -branched residues, the following residue, Arg, and all pseudoproline dipeptide derivatives to enhance the yield of synthesis. Histidine coupling was carried out at 50°C by default to minimize racemization. For the synthesis of K1Nle-IAPP, the Lys residue was replaced by the unnatural amino acid, Fmoc-L-Nle-OH (CAS. 77284-32-3). Another unnatural amino acid, Fmoc-Cit-OH (CAS.133174-15-9), was substituted for Arg to generate R11Cit-IAPP. Upon completion of the synthesis, the peptides were cleaved from the resin using standard trifluoroacetic acid (TFA) methods. Scavengers, including water, triisopropylsilane (TIS), and 3,6-dioxa-1,8-octanedithiol (DODT), were employed during the cleavage step (TFA/H<sub>2</sub>O/TIS/DODT= 92.5: 2.5: 2.5: 2.5). To increase peptide solubility, crude peptides were partially treated with 20% acetic acid (v/v) and subjected to freeze-drying in multiple cycles. Subsequently, the crude peptides were dissolved in a 50% acetic acid solution (1 mg/mL) and mixed with I<sub>2</sub> in methanol to form the disulfide bond between Cys-2 and Cys-7. To remove residual scavengers, the crude peptides were initially treated with hexafluoro-2-propanol (HFIP) and lyophilized. Purification was then performed using reverse-phase high-performance liquid chromatography with a Proto 300 C18 semi-preparative column and a two-solution gradient. Solution A consisted of 100% H<sub>2</sub>O and 0.045% HCl (v/v), while solution B comprised 80% acetonitrile, 20% H<sub>2</sub>O, and 0.045% HCl. The collected fractions were pooled and subsequently lyophilized.

The confirmation of peptide molecular weights was conducted using matrix-assisted laser



desorption ionization-time of flight mass spectrometry with an ultrafleXtreme™ device (Bruker, USA). The expected and actual  $[M+H]^+$  values for IAPP were 3904.3 and 3904.0, respectively. For K1Nle-IAPP, the respective  $[M+H]^+$  values were 3889.3 and 3889.2. For R11Cit-IAPP, the respective  $[M+H]^+$  values were 3905.3 and 3905.3.

**Thioflavin-T (ThT) assays.** To prepare the protein solution, approximately 100  $\mu\text{g}$  of protein powder was treated with 100  $\mu\text{L}$  of hexafluoro-2-propanol (HFIP) for 5-6 hours at room temperature and then lyophilized. The resulting peptide powder was dissolved in 300  $\mu\text{L}$  of 10 mM Tris buffer pH 7.4 and subjected to centrifugation at 15,000 rpm for 10 minutes to remove any preformed aggregates. The supernatant was carefully transferred to another microtube, and a 10  $\mu\text{L}$  aliquot was taken to determine the peptide concentration using a BCA protein assay kit (Thermo Fisher Scientific, USA) with bovine serum albumin as the standard. The remaining supernatant was adjusted to a concentration of 30  $\mu\text{M}$  and 15  $\mu\text{M}$  of ThT was added. PAD-13 prepared in DMSO was added according to experimental need. The concentration of DMSO was fixed at 1%. For seeding experiments, preformed IAPP amyloid fibrils were generated by incubating the IAPP solution in microtubes for three days with shaking at 500 rpm. ThT assays were conducted at 25°C using a sealed 384-well nonbinding surface microplate (Corning 3575, USA) without any additional agitation. The measurements were performed using a SpectraMax M2 multimode microplate reader (Molecular Devices, USA) or a Hidex Sense multimode microplate reader (Hidex, Finland) with excitation at 430 nm and emission at 485 nm. Data points were collected every hour, and the average fluorescence with standard error of the mean was plotted against time using triplicate wells.

**Transmission electron microscope (TEM).** TEM images were recorded at the instrumentation center of the National Taiwan University utilizing a Hitachi model H-7100 transmission electron microscope (Japan) operating at an accelerating voltage of 120 kV. Five microliters of the peptide solution recovered following the ThT assay, were deposited onto a carbon-coated Formvar 300 mesh copper grid and allowed to sit for 1 minute. Subsequently, the sample was negatively stained by incubating it with 2% uranyl acetate for an additional 1 minute.

**Fourier transform infrared spectroscopy (FTIR).** Infrared spectra were obtained using FTIR with attenuated total reflectance (ATR, Bruker Tensor 27) technique at a

resolution of  $1\text{ cm}^{-1}$ . Germanium was used as the internal reflection element (IRE). To prepare the samples, each solution, prepared at a concentration of  $30\ \mu\text{M}$  in  $10\ \text{mM}$  Tris buffer pH 7.4 with and without **PAD-13**, was incubated in microtubes with continuous shaking to allow the formation of amyloid fibrils. The fibril solutions were then subjected to centrifugation at  $15,000\ \text{rpm}$  for 30 minutes to remove the buffer. The resulting fibril pellets were washed twice with distilled deionized water and dissolved in  $20\ \mu\text{L}$  DDI water. For FTIR-ATR analysis,  $5\ \mu\text{L}$  of the washed fibril sample was spotted onto the IRE crystal and allowed to evaporate under a gentle flow of nitrogen gas ( $\text{N}_2$ ) to remove excess water. Spectra were recorded by accumulating 64 scans, and a background spectrum was subtracted to account for any instrumental noise or interference.

**Congo Red (CR) binding study.** A stock solution ( $1\ \text{mM}$ ) of CR in ethanol was prepared. The working CR solution of 1% was applied with the protein solution. UV absorbance was measured in the spectral range of  $450\text{--}650\ \text{nm}$  using a SpectraMax M2 multimode microplate reader.

**Gel electrophoresis.** To analyze the remaining soluble peptide components obtained from the ThT assay, gel electrophoresis was performed, and the peptides were visualized using silver staining. The samples were first filtered through a  $0.22\text{-}\mu\text{m}$  syringe filter to remove any large aggregates. Subsequently, the filtered samples were mixed with 4X SDS sample dye. The peptide samples were then loaded onto a 13.5% Tris-tricine SDS-polyacrylamide gel electrophoresis (SDS-PAGE) gel.

**Circular dichroism (CD).** CD experiments were performed using a J-715 circular dichroism spectrometer (JASCO, USA). The protein preparation for CD experiments followed the same protocol as the ThT assays, but PAD-13 was prepared in acetonitrile to avoid interference. Aliquots of  $600\ \mu\text{L}$  of peptide solutions were incubated in microtubes within a ThermoMixer, with 60 seconds of agitation at  $500\ \text{rpm}$  every 45 minutes at  $25\ ^\circ\text{C}$ . At defined time points, samples were individually transferred to a  $1\ \text{mm}$  path-length quartz cell for spectral measurements. CD spectra were recorded in the wavelength range of  $200\text{--}250\ \text{nm}$  with  $1\ \text{nm}$  intervals at  $25\ ^\circ\text{C}$ . The data were obtained by averaging ten scans and corrected based on the background spectrum. To estimate the  $\beta$ -sheet component of the peptides, the online software BeStSel was employed.

**Electrospray ionization-mass spectrometry (ESI-MS).** The experiments were

conducted on a Waters Synapt G2 HDMS instrument with a LockSpray ESI source. IAPP (30  $\mu\text{M}$ ) and **PAD-13** (150  $\mu\text{M}$ ) were prepared in 10 mM Tris buffer at pH 7.4 and first incubated for 2 and 4 h before they were infused into the ESI source at a flow rate of 6  $\mu\text{L}/\text{min}$  by a syringe pump (KDS-100, KD Scientific). Data were collected and analyzed by using MassLynx 4.1.

**Cytocompatibility study.** Mouse embryonic fibroblasts (MEFs), harvested from C57BL/6N mice embryos, were used for the cytocompatibility study of **PAD-13**. MEFs were cultured in the DMEM supplemented with 10% bovine serum (FBS), 1% penicillin/streptomycin, and 1% HEPES under a humidified atmosphere of 5%  $\text{CO}_2$  and 37°C. MEFs (104 cells/well) were placed in the 96-well culture plate and cultured with DMSO or **PAD-13** at 37 °C under 5%  $\text{CO}_2$ . The metabolic activity of the MEFs was determined with alamarBlue assay according to the protocol. Briefly, alamarBlue solutions (10% in serum-contained DMEM) were added to the cell-seeding wells and reacted for 4 h at 37 °C. The alamarBlue solutions were transferred to another 96-well culture plate, and the emission intensity of the solutions at 590 nm was determined with an excitation of 530 nm using a microplate reader (Synergy H1) with subtracted background emission from as-prepared alamarBlue solutions.

**Antimicrobial test.** Fifty microliters of *Staphylococcus aureus* from an overnight culture were added to 950  $\mu\text{L}$  of Lysogeny broth (LB) and cultured for an additional 2.5 h. The bacterial concentration was calculated using the formula derived from the standard curve ( $y = 3 \times 10^9 x - 2 \times 10^8$ ), and a bacterial solution with a concentration of  $1 \times 10^3$  CFU/mL was prepared through serial dilution. Next, 360  $\mu\text{L}$  of the diluted bacterial solution was mixed with 40  $\mu\text{L}$  of test samples. The mixture was then incubated at 37 °C for 30 minutes. Subsequently, 100  $\mu\text{L}$  of the bacterial culture was spread onto a 10 cm LB Agar plate. After incubating for 19 h at 37°C, the colonies were recorded using the LAS-4000 imaging system and analyzed with ImageJ software. Each condition was repeated at least three times and normalized to the DMSO control group. The statistics was analyzed by one way-analysis of variance with Tukey's post test. \*  $P < 0.05$

**The preparation of piperine derivatives.** Piperine (**PP**), caffeic acid (**CA**), ferulic acid (**FA**), 3,4-(Methylenedioxy)cinnamic acid (**MD**), (2E,4E)-5-(3,4-dihydroxyphenyl) penta-2,4-dienoic acid (**PAD-2**), and all other reagents and chemicals for synthesis were

used as purchased without further purification. All nuclear magnetic resonance spectra were recorded on a Bruker AV-300 spectrometer and Bruker Avance III HD-600 MHz operating at 300 MHz and 600 MHz for  $^1\text{H}$  analysis and at 75 MHz and 150 MHz for  $^{13}\text{C}$  analysis, respectively. The chemical shifts are expressed in ppm and referenced to solvent peaks ( $\text{CDCl}_3$ :  $^1\text{H}$  7.26 ppm,  $^{13}\text{C}$  77.16 ppm;  $\text{CD}_3\text{OD}$ :  $^1\text{H}$  3.31 ppm,  $^{13}\text{C}$  49.00 ppm;  $d_6$ -DMSO:  $^1\text{H}$  2.50 ppm,  $^{13}\text{C}$  39.52 ppm;  $\text{D}_2\text{O}$ :  $^1\text{H}$  4.79 ppm). Coupling constants ( $J$ ) are reported in Hz. Splitting patterns are reported as follows: s (singlet), d (doublet), t (triplet), q (quartet), m (multiplet), and br (broad). IR spectra were recorded on a Perkin–Elmer Spectrum 100 FTIR spectrometer and data are reported in  $\text{cm}^{-1}$ . High-resolution mass spectrometry (HRMS) was performed with a Thermo Finnigan LCQ Advantage (ESI-MS). Low-resolution mass spectrometry (LRMS) was performed with a Thermo Finnigan LCQ Advantage (ESI-MS) and a JEOL JMS- 700 spectrometer (EI-MS). Melting points were recorded with Melting Point Apparatus MP-2D and those are uncorrected. UV/Vis absorptions and fluorescent emissions were carried out on a SpectraMax M2 microplate readers. All reactions were monitored by thin-layer chromatography analysis using Merck105554TLC Silica gel 60 F<sub>254</sub> 25 aluminum sheets 20 x 20 cm. Column chromatography was performed in a Chromatorex MB 70-40/75 (Fuji Silysia Chemicals Ltd.). Any reactions that required anhydrous conditions were conducted under argon. Anhydrous dichloromethane (DCM) was distilled from calcium hydride under nitrogen. Tetrahydrofuran (THF) and *N,N*-dimethylformamide (DMF) were dried with 3Å molecular sieves and stood overnight before use.

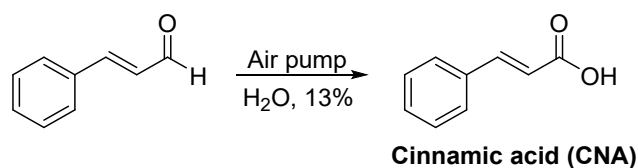

**Scheme S1.** Synthesis of cinnamic acid.

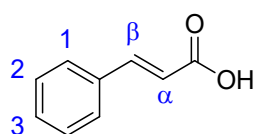

A solution of cinnamaldehyde (1.1 g, 8.3 mmol) in water was pumped with air at room temperature overnight. A pale solid precipitate was formed during the reaction. After completion of the reaction, 2M NaOH<sub>(aq)</sub> was added to the reaction mixture until the pH of the solution was basic, and the reaction mixture was subsequently washed with DCM. The water layer was separated and the pH value was adjusted to 1 with 1M HCl<sub>(aq)</sub>. Thereafter, the acidified aqueous layer was extracted with DCM twice. The combined organic layer was dried over MgSO<sub>4</sub>, filtered, and concentrated under reduced pressure to give compound **CNA** as a pale-yellow solid. (160.0 mg, 13%). Mp: 130°C; <sup>1</sup>H NMR (300 MHz, CDCl<sub>3</sub>, 295 K): δ = 6.47 (d, 1H, *J* = 15.9 Hz, H<sub>α</sub>), 7.40-7.43 (m, 3H, H<sub>2</sub>, H<sub>3</sub>), 7.55-7.58 (m, 2H, H<sub>1</sub>), 7.81 (d, 1H, *J* = 16.0 Hz, H<sub>β</sub>) ppm; <sup>13</sup>C NMR (75 MHz, CDCl<sub>3</sub>, 297 K): δ = 117.4, 128.5 (2C), 129.1 (2C), 130.9, 134.2, 147.3, 172.7 ppm; LRMS (EI) *m/z* calcd. for C<sub>9</sub>H<sub>8</sub>O<sub>2</sub> [M]<sup>+</sup>: 148.1; Found 148.1. The <sup>1</sup>H and <sup>13</sup>C NMR spectra were agreed with the reported literature<sup>1</sup>.

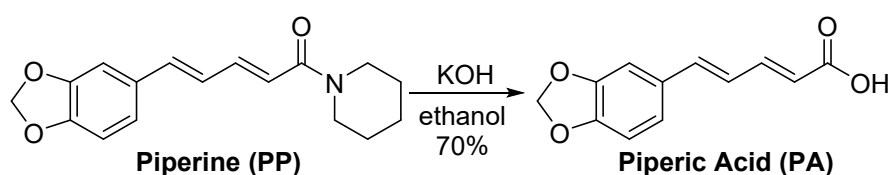

**Scheme S2.** Synthesis of piperic acid (PA).

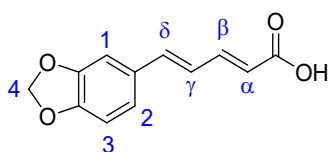

### Piperic Acid (PA)

Piperine (900.0 mg, 3.2 mmol) was dissolved in 8.0 mL EtOH containing 10 w.t.% of KOH and the reaction mixture was refluxed overnight. After completion of the reaction, the remaining residue was filtered and that was washed with EtOH to yield compound **PA** as a brown solid (500.0 mg, 70%). Mp: > 400°C; <sup>1</sup>H NMR (300 MHz, D<sub>2</sub>O, 295 K): δ = 5.94 (s, 2H, H<sub>4</sub>), 5.96 (d, 1H, *J*<sub>1</sub> = 15.2 Hz, H<sub>α</sub>), 6.78-6.85 (m, 3H, H<sub>7</sub>, H<sub>δ</sub>, H<sub>3</sub>), 6.95-6.98 (dd, 1H, *J*<sub>1</sub> = 8.1 Hz, *J*<sub>2</sub> = 1.6 Hz, H<sub>2</sub>), 7.05-7.13 (m, 2H, H<sub>1</sub>, H<sub>β</sub>) ppm; <sup>13</sup>C NMR (75 MHz, *d*<sub>6</sub>-DMSO with 10% D<sub>2</sub>O, 297 K): δ = 102.2, 106.6, 109.7, 123.2,

127.4, 131.2, 132.2, 136.8, 139.8, 148.4, 148.9, 173.7 ppm; HRMS (ESI)  $m/z$  calcd. for  $C_{12}H_{11}O_4[M+H]^+$ : 219.0652; Found 219.0658. The  $^1H$  and  $^{13}C$  NMR spectra were agreed with the reported literature<sup>2,3</sup>.

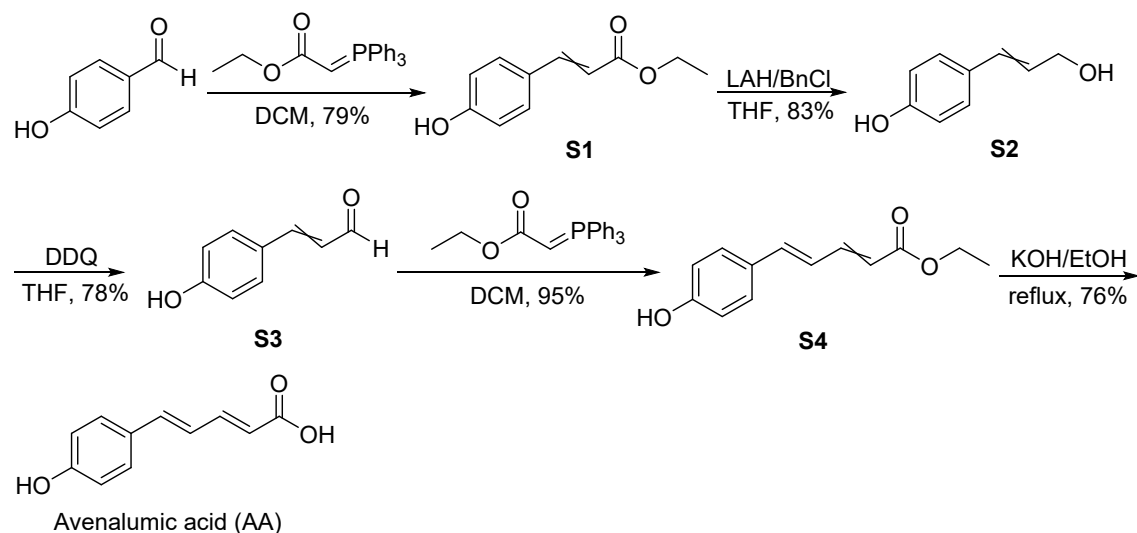

**Scheme S3.** Synthesis of avenalumatic acid (AA).

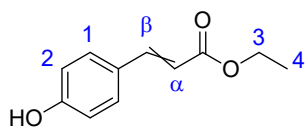

**(E)-ethyl 3-(4-hydroxyphenyl)acrylate (S1)**

To a solution of 4-hydroxybenzaldehyde (5.0 g, 40.9 mmol) in dry DCM (40.0 mL) was added ethyl 2-(triphenylphosphoranylidene)acetate (21.4 g, 61.4 mmol). The reaction mixture was stirred at room temperature for overnight. After the completion of the reaction, the reaction mixture was concentrated under reduced pressure and the crude residue was dissolved in hexane containing 10 w.t.% of ether. The white precipitate was removed by filtration. The filtrate was concentrated under reduced pressure and purified by column chromatography to yield ester **S1** (6.20g, 79%, *E/Z* ratio = 6:1) as a white solid.  $R_f$  = 0.55 (n-Hexane: EtOAc = 2:1v/v).  $^1H$  NMR (300 MHz,  $CDCl_3$ , 297 K):  $\delta$  = 1.34 (t, 3H,  $J$  = 14.2 Hz,  $H_4$ ), 4.24-4.31 (q, 2H,  $J_1$  = 21.4 Hz,  $H_3$ ), 5.82 (d, 1H,  $J$  = 12.7 Hz,  $H_{\alpha}$ ), 6.29 (d, 1H,  $J$  = 16.0 Hz,  $H_{\omega}$ ), 6.84-6.90 (m, 2H,  $H_2$ ), 7.38-7.41 (d, 2H,  $J$  = 8.6 Hz,  $H_1$ ), 7.64 (d, 1H,  $J$  = 15.9 Hz,  $H_{\beta}$ ) ppm;  $^{13}C$  NMR (75 MHz,  $CDCl_3$ , 297 K):  $\delta$  = 14.4, 61.0, 115.2, 116.1 (2C), 126.7, 130.2 (2C), 145.4, 158.7, 168.7 ppm. The  $^1H$  and  $^{13}C$

NMR spectra were agreed with reported literature<sup>4</sup>.

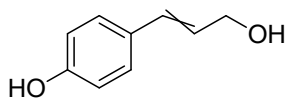

### **(E)-4-(3-hydroxyprop-1-en-1-yl)phenol (S2)**

To a solution of lithium aluminum hydride (148.0 mg, 3.9 mmol) in dry THF (5.0 mL) was slowly added a dry THF (5.0 mL) solution containing BnCl (493.7 mg, 3.9 mmol) at 0°C. The resulting mixture was stirred for 15 min, and then a solution of compound **S1** (500.0 mg, 2.6 mmol) in dry THF (2.5 mL) was added dropwise to the reaction at 0°C. The reaction mixture was stirred at room temperature for 1.5 h. After completion of the reaction, it was carefully quenched by the addition of water and the solution mixture was extracted with EtOAc. The organic layer was dried over MgSO<sub>4</sub>, filtered, and concentrated under reduced pressure to obtain crude product as a yellow oil (385 mg, 83%). *R<sub>f</sub>* = 0.29 (n-Hexane: EtOAc = 1:1 v/v). The crude product was directly used in the next step without further purification.

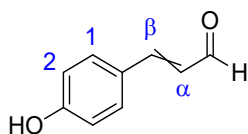

### **(E)-3-(4-hydroxyphenyl)acrylaldehyde (S3)**

To a solution of crude **S2** (200.0 mg, 1.3 mmol) in dry THF (13.0 mL) was added DDQ (360.9 mg, 1.6 mmol) under an ice bath and then the reaction mixture was stirred at room temperature for overnight. After the completion of the reaction, the reaction mixture was concentrated under reduced pressure and directly purified by column chromatography to yield aldehyde **S3** (153 mg, 78%, *E/Z* ratio = 10:1) as a light orange solid. *R<sub>f</sub>* = 0.41 (n-Hexane: EtOAc = 1:1 v/v). <sup>1</sup>H NMR (300 MHz, CD<sub>3</sub>OD, 297 K): δ = 5.91-6.99 (dd, 1H, *J*<sub>1</sub> = 16.1 Hz, *J*<sub>2</sub> = 5.5 Hz, H<sub>α'</sub>), 6.57-6.65 (dd, 1H, *J*<sub>1</sub> = 15.8 Hz, *J*<sub>2</sub> = 7.8 Hz, H<sub>α</sub>), 6.73-6.76 (m, 2H, H<sub>2'</sub>), 6.82-6.87 (m, 2H, H<sub>2</sub>), 7.25-7.28 (m, 2H, H<sub>1'</sub>), 7.52-7.61 (m, 3H, H<sub>1</sub>, H<sub>β</sub>), 9.55 (d, 1H, *J* = 7.9 Hz, CHO) ppm; <sup>13</sup>C NMR (75 MHz, CD<sub>3</sub>OD, 297 K): δ = 117.0 (2C), 126.4, 127.1, 132.0 (2C), 155.9, 162.3, 192.2 ppm. The <sup>1</sup>H and <sup>13</sup>C NMR spectra were agreed with reported literature<sup>5</sup>.

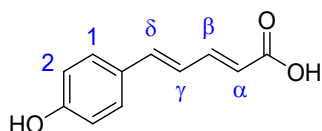

### Avenalumic acid (AA)

To a solution of compound **S3** (100.0 mg, 0.7 mmol) in dry DCM (7.0 mL) was added ethyl 2-(triphenylphosphoranylidene)acetate (352.7 mg, 1.0 mmol) and the reaction mixture was stirred at room temperature for overnight. After completion of the reaction, the reaction mixture was concentrated under reduced pressure and the crude residue was dissolved in hexane containing 10 w.t.% of ether. The white precipitate was removed by filtration. The filtrate was concentrated and then purified by column chromatography to yield ester **S4** (140.0 mg, 95%) as a light-yellow solid.  $R_f = 0.54$  (n-Hexane: EtOAc = 1:1v/v). Then, compound **S4** (140.0 mg, 0.6 mmol) was dissolved in EtOH (30.0 mL) containing 10 w.t.% of KOH and the reaction mixture was refluxed for 14 hr. After cooling to room temperature, EtOH was removed under reduced pressure. Then, water was added to the crude residue and washed with DCM. The aqueous layer was separated and the pH value was adjusted to 1 by adding 1M HCl<sub>(aq)</sub>. After the addition of 1 M HCl<sub>(aq)</sub>, the remaining solution mixture was extracted with EtOAc twice. The combined organic layer was dried over MgSO<sub>4</sub>, filtered, and concentrated under reduced pressure to yield **AA** (93.0 mg, 76%) as a white solid. Mp: 223°C; <sup>1</sup>H NMR (300 MHz, CD<sub>3</sub>OD, 297 K):  $\delta = 5.92$  (d, 1H,  $J = 15.1$  Hz, H <sub>$\alpha$</sub> ), 6.75-6.92 (m, 4H, H <sub>$\gamma$</sub> , H <sub>$\delta$</sub> , H<sub>2</sub>), 7.37-7.46 (m, 3H, H<sub>1</sub>, H <sub>$\beta$</sub> ) ppm; <sup>13</sup>C NMR (75 MHz, CD<sub>3</sub>OD, 297 K):  $\delta = 116.7$  (2C), 120.4, 124.4, 129.2, 130.0 (2C), 142.2, 147.5, 159.9, 170.9 ppm; LRMS (EI)  $m/z$  calcd. for C<sub>11</sub>H<sub>10</sub>O<sub>3</sub> [M]<sup>+</sup>: 190.1; Found 190.1. The <sup>1</sup>H and <sup>13</sup>C NMR spectra were agreed with the reported literature<sup>6</sup>.

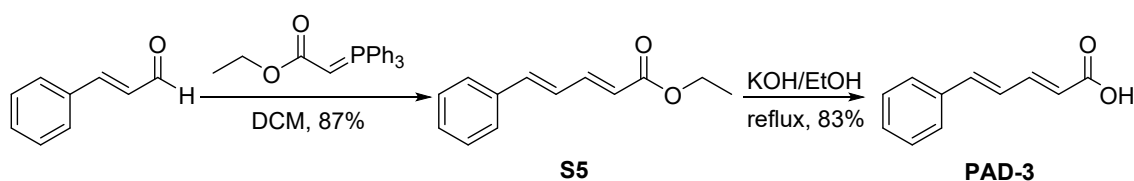

**Scheme S4.** Synthesis of PAD-3.



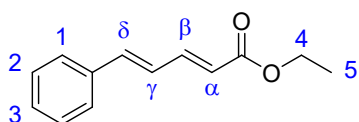

**(2E,4E)-ethyl 5-phenylpenta-2,4-dienoate (S5)**

To a solution of (*E*)-cinnamaldehyde (1.0 g, 7.5 mmol) in DCM (20.0 mL) was added ethyl 2-(triphenylphosphoranylidene)acetate (2.8 g, 7.9 mmol) and then the reaction mixture was stirred at room temperature for overnight. After the completion of the reaction, the solvent was removed under reduced pressure and the crude residue was dissolved in hexane containing 10 w.t.% of ether. The white precipitate was removed and the filtrate was concentrated under reduced pressure and purified by column chromatography to yield ester **S1** (1.3 g, 87%) as a colorless oil.  $R_f = 0.42$  (n-Hexane: EtOAc = 9:1 v/v).  $^1\text{H}$  NMR (300 MHz,  $\text{CDCl}_3$ , 296 K):  $\delta = 1.31$  (t, 3H,  $J = 14.3$  Hz,  $\text{H}_5$ ), 4.24 (q, 2H,  $J_1 = 21.4$  Hz,  $\text{H}_4$ ), 6.00 (d, 1H,  $J = 15.3$  Hz,  $\text{H}_\alpha$ ), 6.87-6.90 (m, 2H,  $\text{H}_\gamma$ ,  $\text{H}_\delta$ ), 7.30-7.49 (m, 6H,  $\text{H}_\beta$ ,  $\text{H}_1$ ,  $\text{H}_2$ ,  $\text{H}_3$ ) ppm;  $^{13}\text{C}$  NMR (75 MHz,  $\text{CDCl}_3$ , 297 K):  $\delta = 14.5$ , 60.5, 121.5, 126.4, 127.3 (2C), 128.9 (2C), 129.2, 136.2, 140.5, 144.7, 167.2 ppm. The  $^1\text{H}$  and  $^{13}\text{C}$  NMR spectra were agreed with reported literature<sup>7</sup>.

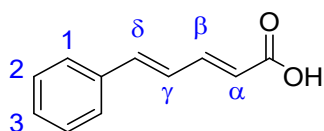

**(2E,4E)-5-phenylpenta-2,4-dienoic acid (PAD-3)**

Compound **S5** (640.0 mg, 3.5 mmol) was dissolved in 30.0 mL EtOH containing 10 w.t.% of KOH and the reaction mixture was refluxed for 14 hr. After cooling to room temperature, the reaction mixture was concentrated under reduced pressure. The concentrated residue was diluted with water and washed with DCM. The aqueous layer was separated and the pH value was adjusted to 1 by adding 1M  $\text{HCl}_{(\text{aq})}$ . After the addition of 1 M  $\text{HCl}_{(\text{aq})}$ , a white precipitate was formed and then it was isolated by filtration. The filter cake was air-dried to yield **PAD-3** (502.0 mg, 83%) as a white solid. Mp: 170°C;  $^1\text{H}$  NMR (300 MHz,  $\text{CDCl}_3$ , 297 K):  $\delta = 6.01$  (d, 1H,  $J = 15.2$  Hz,  $\text{H}_\alpha$ ), 6.86-6.99 (m, 2H,  $\text{H}_\gamma$ ,  $\text{H}_\delta$ ), 7.30-7.40 (m, 3H,  $\text{H}_2$ ,  $\text{H}_3$ ), 7.47-7.60 (m, 3H,  $\text{H}_1$ ,  $\text{H}_\beta$ ) ppm;  $^{13}\text{C}$  NMR (75 MHz,  $\text{CDCl}_3$ , 297 K):  $\delta = 120.4$ , 126.1, 127.5 (2C), 129.0 (2C), 129.5, 135.9, 141.8, 147.1, 172.5 ppm; LRMS (EI)  $m/z$  calcd. for  $\text{C}_{11}\text{H}_{10}\text{O}_2$  [ $\text{M}$ ]<sup>+</sup>: 174.1; Found 174.1. The  $^1\text{H}$  and

$^{13}\text{C}$  NMR spectra were agreed with the reported literature<sup>8</sup>.

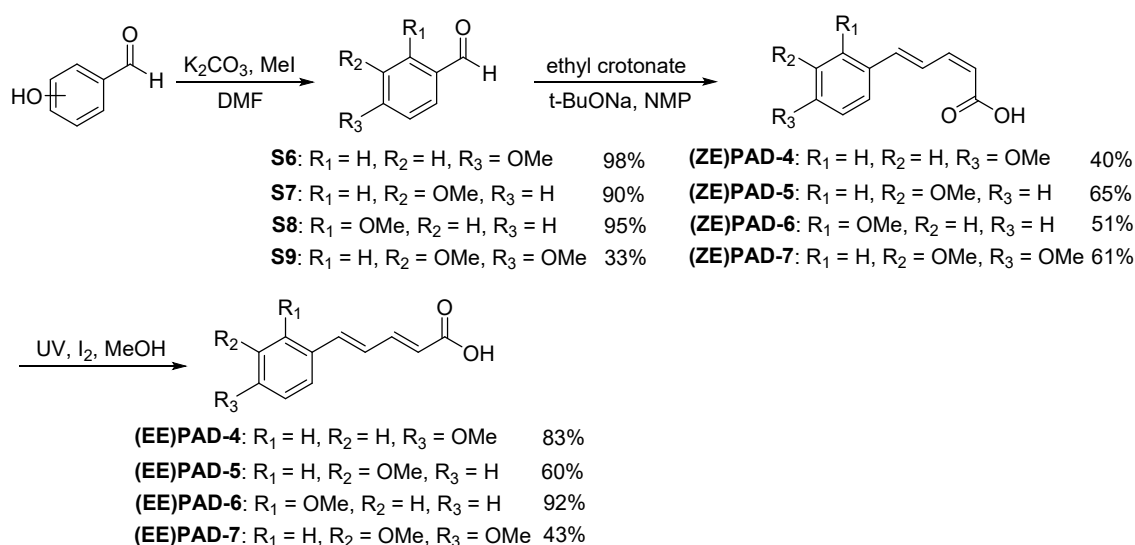

**Scheme S6.** Synthesis of (ZE)PAD-4-7 and (EE)PAD-4-7.

### General procedure A for the synthesis of S6 to S9

To a solution of hydroxybenzaldehyde (1.0 eq) and potassium carbonate (3.0 eq) in dry DMF (15–20 mL) was added methyl iodide (2.0 eq; 3.0 eq for compound **S9**) under an ice bath. The reaction mixture was stirred at room temperature for overnight. After completion of the reaction, it was diluted with EtOAc and the reaction mixture was extracted with brine. The organic layer was dried over  $\text{MgSO}_4$  and concentrated under reduced pressure. The crude residues were purified by column chromatography to yield the desired products.

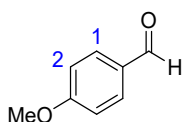

### 4-methoxybenzaldehyde (**S6**)

Compound **S6** (1.1 g, 98%) as a colorless oil was prepared from 4-hydroxybenzaldehyde (1.0 g, 8.2 mmol) according to the general procedure **A** described above.  $R_f = 0.47$  (n-Hexane: EtOAc = 2:1v/v).  $^1\text{H}$  NMR (300 MHz,  $\text{CDCl}_3$ , 296 K):  $\delta = 3.89$  (s, 3H,  $\text{OCH}_3$ ), 6.98-7.02 (m, 2H,  $\text{H}_2$ ), 7.81-7.86 (m, 2H,  $\text{H}_1$ ), 9.88 (s, 1H, CHO)

ppm;  $^{13}\text{C}$  NMR (75 MHz,  $\text{CDCl}_3$ , 297 K):  $\delta = 55.7, 114.4$  (2C), 130.1, 132.1 (2C), 164.7, 190.9 ppm. The  $^1\text{H}$  and  $^{13}\text{C}$  NMR spectra were agreed with reported literature<sup>9</sup>.

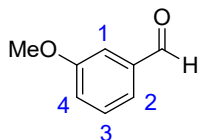

### 3-methoxybenzaldehyde (S7)

Compound **S7** (2.0 g, 90%) as a colorless oil was prepared from 3-hydroxybenzaldehyde (2.0 g, 16.4 mmol) according to the general procedure **A** described above.  $R_f = 0.55$  (n-Hexane: EtOAc = 2:1 v/v).  $^1\text{H}$  NMR (300 MHz,  $\text{CDCl}_3$ , 297 K):  $\delta = 3.86$  (s, 3H,  $\text{OCH}_3$ ), 7.16-7.20 (m, 1H,  $\text{H}_4$ ), 7.38-7.46 (m, 3H,  $\text{H}_1, \text{H}_2, \text{H}_3$ ), 9.97 (s, 1H, CHO) ppm;  $^{13}\text{C}$  NMR (75 MHz,  $\text{CDCl}_3$ , 297 K):  $\delta = 55.6, 112.2, 121.7, 123.7, 130.2, 137.9, 160.3, 192.3$  ppm. The  $^1\text{H}$  and  $^{13}\text{C}$  NMR spectra were agreed with reported literature<sup>10</sup>.

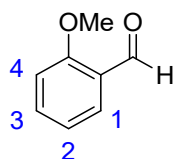

### 2-methoxybenzaldehyde (S8)

Compound **S8** (2.1 g, 95%) as a colorless oil was prepared from 2-hydroxybenzaldehyde (2.0 g, 16.4 mmol) according to the general procedure **A** described above.  $R_f = 0.50$  (n-Hexane: EtOAc = 2:1 v/v).  $^1\text{H}$  NMR (300 MHz,  $\text{CDCl}_3$ , 297 K):  $\delta = 3.93$  (s, 3H,  $\text{OCH}_3$ ), 6.97-7.05 (m, 2H,  $\text{H}_2, \text{H}_4$ ), 7.52-7.58 (m, 1H,  $\text{H}_3$ ), 7.81-7.84 (dd, 1H,  $J_1 = 7.6$  Hz,  $J_2 = 1.7$  Hz,  $\text{H}_1$ ), 10.47 (s, 1H, CHO) ppm;  $^{13}\text{C}$  NMR (75 MHz,  $\text{CDCl}_3$ , 297 K):  $\delta = 55.7, 111.7, 120.8, 124.9, 128.7, 136.1, 161.9, 189.9$  ppm. The  $^1\text{H}$  and  $^{13}\text{C}$  NMR spectra were agreed with reported literature<sup>11</sup>.

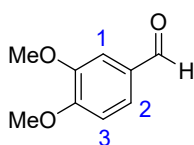

### 3,4-dimethoxybenzaldehyde (S9)

Compound **S9** (800.0 mg, 33%) as a white solid was prepared from 3,4-dihydroxybenzaldehyde (2.0 g, 14.5 mmol) according to the general procedure **A** described above.  $R_f = 0.27$  (n-Hexane: EtOAc = 2:1 v/v).  $^1\text{H}$  NMR (300 MHz,  $\text{CDCl}_3$ , 297 K):  $\delta = 3.94$  (s, 3H,  $\text{OCH}_3$ ), 3.96 (s, 3H,  $\text{OCH}_3$ ), 6.97 (d, 2H,  $J = 8.2$  Hz,  $\text{H}_3$ ), 7.40-7.47 (m, 2H,  $\text{H}_1$ ,  $\text{H}_2$ ), 9.85 (s, 1H, CHO) ppm;  $^{13}\text{C}$  NMR (75 MHz,  $\text{CDCl}_3$ , 297 K):  $\delta = 56.1$ , 56.3, 109.1, 110.5, 127.0, 130.3, 149.8, 154.6, 191.0 ppm. The  $^1\text{H}$  and  $^{13}\text{C}$  NMR spectra were agreed with reported literature<sup>12</sup>.

### General procedure B for the synthesis of (ZE)PAD-4 to (ZE)PAD-7

To a solution of methoxybenzaldehyde (1 eq, compound **S6** to **S9**) and ethyl crotonate (1.3 eq) in NMP (5–10 mL) was added sodium *tert*-butoxide (1.2 eq) under an ice bath. The reaction mixture was stirred at room temperature for overnight. After completion of the reaction, the reaction mixture was diluted with saturated  $\text{NaHCO}_3$  (aq) and was extracted with DCM. The aqueous layer was separated and the pH value was adjusted to 1 with 1M  $\text{HCl}$  (aq). Thereafter, the solution mixture was extracted with EtOAc three times. The combined organic layer was dried over  $\text{MgSO}_4$ , filtered, and concentrated under reduced pressure. The crude product was purified by column chromatography to yield desired products.

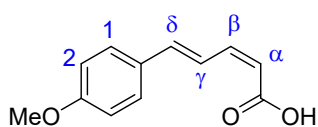

### (2Z,4E)-5-(4-methoxyphenyl)penta-2,4-dienoic acid ((ZE)PAD-4)

To a solution of 4-methoxybenzaldehyde (400.0 mg, 2.9 mmol) and *tert*-butoxide (396.0 mg, 3.5 mmol) in NMP (8 mL) was added ethyl crotonate (0.5 mL, 3.9 mmol), and the reaction mixture was stirred at room temperature for 18 h. The mixture was subsequently extracted with 1M  $\text{HCl}$  (aq) and  $\text{Et}_2\text{O}$ , and the  $\text{Et}_2\text{O}$  layer was then washed with saturated  $\text{NaHCO}_3$  (aq). The organic layer was dried over  $\text{MgSO}_4$  and the solvent was removed under reduced pressure. The crude product was purified by column chromatography to afford **(ZE)PAD-4** (241.0 mg, 40%) as a pale-yellow solid. Mp:

126°C;  $R_f = 0.30$  (n-Hexane: EtOAc = 2:1v/v).  $^1\text{H NMR}$  (300 MHz,  $\text{CDCl}_3$ , 297 K):  $\delta = 3.84$  (s, 3H,  $\text{OCH}_3$ ), 5.70 (d, 1H,  $J = 11.07$  Hz,  $\text{H}_\alpha$ ), 6.82 (d, 1H,  $J = 10.86$  Hz,  $\text{H}_\gamma$ ), 6.87 (d, 1H,  $J = 5.67$  Hz,  $\text{H}_\beta$ ), 6.90 (d, 2H,  $J = 8.79$  Hz,  $\text{H}_2$ ), 7.50 (d, 2H,  $J = 8.76$  Hz,  $\text{H}_1$ ), 7.99 (ddd, 1H,  $J = 0.66$  Hz, 11.37 Hz, 15.36 Hz,  $\text{H}_\delta$ ) ppm;  $^{13}\text{C NMR}$  (75 MHz,  $\text{CDCl}_3$ , 297 K):  $\delta = 55.5, 114.4, 115.2, 123.0, 129.1, 129.3, 142.4, 147.7, 160.7$  ppm; IR (KBr,  $\text{cm}^{-1}$ ): 2922, 2848, 1691, 1614, 1587, 1509, 1447, 1249, 1230, 1173; HRMS (ESI)  $m/z$  calcd. for  $\text{C}_{12}\text{H}_{13}\text{O}_3$  ( $[\text{M}+\text{H}]^+$ ): 205.0865; Found 205.0865.

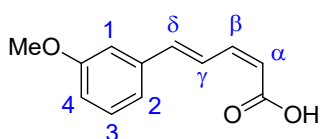

**(2Z,4E)-5-(3-methoxyphenyl)penta-2,4-dienoic acid ((ZE)PAD-5)**

Compound **(ZE)PAD-5** (490.0 mg, 65%) as a yellow solid was prepared from compound **S12** (500.0 mg, 3.7 mmol) and ethyl crotonate (0.6 mL, 4.8 mmol) according to the general procedure **B** described above. Mp: 97°C;  $R_f = 0.20$  (n-Hexane: EtOAc = 2:1v/v).  $^1\text{H NMR}$  (300 MHz,  $\text{CDCl}_3$ , 297 K):  $\delta = 3.84$  (s, 3H,  $\text{OCH}_3$ ), 5.77 (d, 1H,  $J = 11.3$  Hz,  $\text{H}_\alpha$ ), 6.82-6.90 (m, 3H,  $\text{H}_\beta, \text{H}_\delta, \text{H}_3$ ), 7.04-7.06 (m, 1H,  $\text{H}_4$ ), 7.13-7.16 (m, 1H,  $\text{H}_2$ ), 7.26-7.32 (m, 1H,  $\text{H}_1$ ), 8.04-8.13 (ddd, 1H,  $J = 1.0$  Hz,  $J = 11.6$  Hz,  $J = 15.6$  Hz,  $\text{H}_\gamma$ ) ppm;  $^{13}\text{C NMR}$  (150 MHz,  $\text{CDCl}_3$ , 302 K):  $\delta = 55.3, 112.8, 115.0, 116.7, 120.3, 125.1, 129.7, 137.5, 142.3, 146.9, 159.9, 171.7$  ppm; IR (KBr,  $\text{cm}^{-1}$ ): 2968, 2940, 2837, 2746, 2571, 1692, 1618, 1605, 1588, 1493, 1453, 1437, 1319, 1265, 1242, 1152, 1043, 1003, 962, 915, 824, 779, 770, 705, 678; LRMS (EI)  $m/z$  calcd. for  $\text{C}_{12}\text{H}_{12}\text{O}_3$   $[\text{M}]^+$ : 204.1; Found 204.1.

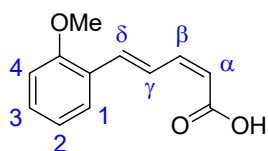

**(2Z,4E)-5-(2-methoxyphenyl)penta-2,4-dienoic acid ((ZE)PAD-6)**

Compound **(ZE)PAD-6** (260.0 mg, 51%) as a white solid was prepared from compound **S13** (340.0 mg, 2.5 mmol) and ethyl crotonate (0.4 mL, 3.3 mmol) according

to the general procedure **B** described above. Mp: 143°C;  $R_f$  = 0.23 (n-Hexane: EtOAc = 2:1 v/v).  $^1\text{H}$  NMR (300 MHz,  $\text{CDCl}_3$ , 297 K):  $\delta$  = 3.88 (s, 3H,  $\text{OCH}_3$ ), 5.72 (d, 1H,  $J$  = 11.3 Hz,  $\text{H}_\alpha$ ), 6.85-7.00 (m, 3H,  $\text{H}_\gamma$ ,  $\text{H}_\delta$ ,  $\text{H}_4$ ), 7.25-7.33 (m, 2H,  $\text{H}_2$ ,  $\text{H}_3$ ), 7.63-7.66 (dd, 1H,  $J_1$  = 7.7 Hz,  $J_2$  = 1.6 Hz,  $\text{H}_1$ ), 8.07-8.16 (ddd, 1H,  $J_1$  = 15.8 Hz,  $J_2$  = 11.4 Hz,  $J_3$  = 1.0 Hz,  $\text{H}_\beta$ ) ppm;  $^{13}\text{C}$  NMR (75 MHz,  $\text{CDCl}_3$ , 297 K):  $\delta$  = 55.7, 111.1, 115.9, 120.9 (2C), 125.3 (2C), 127.7, 130.6, 137.3, 148.1, 157.6 ppm; IR (KBr,  $\text{cm}^{-1}$ ): 2946, 2741, 2588, 1693, 1666, 1604, 1590, 1570, 1484, 1470, 1446, 1434, 1325, 1294, 1244, 1225, 1175, 1160, 1114, 1025, 1003, 957, 906, 824, 778, 757, 695; LRMS (EI)  $m/z$  calcd. for  $\text{C}_{12}\text{H}_{12}\text{O}_3$   $[\text{M}]^+$ : 204.1; Found 204.1.

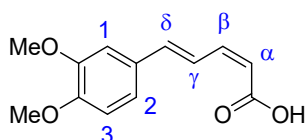

#### **(2Z,4E)-5-(3,4-dimethoxyphenyl)penta-2,4-dienoic acid ((ZE)PAD-7)**

Compound **(ZE)PAD-7** (257.0 mg, 61%) as a yellow solid was prepared from compound **S14** (300.0 mg, 1.8 mmol) and ethyl crotonate (0.3 mL, 2.3 mmol) according to the general procedure **B** described above. Mp: 151°C;  $R_f$  = 0.08 (n-Hexane: EtOAc = 2:1 v/v).  $^1\text{H}$  NMR (300 MHz,  $\text{CDCl}_3$ , 297 K):  $\delta$  = 3.91 (s, 3H,  $\text{OCH}_3$ ), 3.93 (s, 3H,  $\text{OCH}_3$ ), 5.70 (d, 1H,  $J$  = 11.2 Hz,  $\text{H}_\alpha$ ), 6.80-6.87 (m, 3H,  $\text{H}_\gamma$ ,  $\text{H}_\delta$ ,  $\text{H}_3$ ), 7.05-7.11 (m, 3H,  $\text{H}_1$ ,  $\text{H}_2$ ), 7.91-8.00 (ddd, 1H,  $J_1$  =  $J_2$  = 15.9 Hz,  $J_3$  = 1.1 Hz,  $\text{H}_\beta$ ) ppm;  $^{13}\text{C}$  NMR (75 MHz,  $\text{CDCl}_3$ , 297 K):  $\delta$  = 55.1 (2C), 109.8, 111.2, 115.4, 121.8, 123.2, 129.4, 142.8, 147.7, 149.3, 150.5, 172.2 ppm; IR (KBr,  $\text{cm}^{-1}$ ) 2962, 2926, 2837, 2745, 2562, 1782, 1688, 1668, 1613, 1586, 1516, 1437, 1348, 1262, 1236, 1217, 998, 821, 798, 764, 739; LRMS (EI)  $m/z$  calcd. for  $\text{C}_{13}\text{H}_{14}\text{O}_4$   $[\text{M}]^+$ : 234.1; Found 234.1.

#### **General procedure C for the synthesis of (EE)PAD-4 to (EE)PAD-7**

To a solution of **(EZ)PAD-4** to **(EZ)PAD-7** in MeOH (10.0 mL) was added iodine (0.01 eq). The reaction mixture was placed in a UV photosynthesizer with a 254 nm light source and stirred for 2 h. The reaction mixture was concentrated under reduced pressure and purified by column chromatography or recrystallized with hexane.

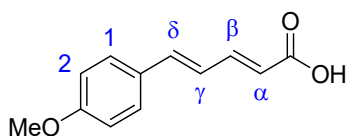

**(2*E*,4*E*)-5-(4-methoxyphenyl)penta-2,4-dienoic acid ((*EE*)PAD-4)**

Compound (***EE***)PAD-4 (100.0 mg, 83%) as a white solid was prepared from compound (***ZE***)PAD-4 (120.0 mg, 0.6 mmol) and iodine (1.5 mg) according to the general procedure C described above.  $R_f = 0.13$  (n-Hexane: EtOAc = 2:1 v/v). Mp: 189°C;  $^1\text{H}$  NMR (300 MHz,  $d_6$ -DMSO, 297 K):  $\delta = 3.77$  (s, 3H, OCH<sub>3</sub>), 5.94 (d, 1H,  $J = 15.1$  Hz, H <sub>$\alpha$</sub> ), 6.90-7.02 (m, 4H, H <sub>$\gamma$</sub> , H <sub>$\delta$</sub> , H<sub>2</sub>), 7.27-7.36 (ddd, 1H,  $J_1 = 15.2$  Hz,  $J_2 = 8.3$  Hz,  $J_3 = 1.9$  Hz, H <sub>$\beta$</sub> ), 7.49-7.52 (d, 2H,  $J = 8.8$  Hz, H<sub>1</sub>) ppm;  $^{13}\text{C}$  NMR (75 MHz, CDCl<sub>3</sub>, 297 K):  $\delta = 55.3$ , 114.4 (2C), 120.9, 124.4, 128.7, 128.8 (2C), 139.8, 144.8, 160.0, 167.8 ppm; LRMS (EI)  $m/z$  calcd. for C<sub>12</sub>H<sub>12</sub>O<sub>3</sub> [M]<sup>+</sup>: 204.1; Found 204.1. The  $^1\text{H}$  and  $^{13}\text{C}$  NMR spectra were agreed with reported literature<sup>13</sup>.

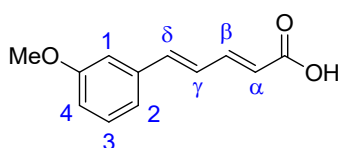

**(2*E*,4*E*)-5-(3-methoxyphenyl)penta-2,4-dienoic acid ((*EE*)PAD-5)**

Compound (***EE***)PAD-5 (30.0 mg, 60%) as a white solid was prepared from compound (***ZE***)PAD-5 (50.0 mg, 0.3 mmol) and iodine (0.6 mg) according to the general procedure C described above.  $R_f = 0.13$  (n-Hexane: EtOAc = 2:1 v/v). Mp: 133°C;  $^1\text{H}$  NMR (300 MHz, CDCl<sub>3</sub>, 297 K):  $\delta = 3.84$  (s, 3H, OCH<sub>3</sub>), 6.01 (d, 1H,  $J = 15.2$  Hz, H <sub>$\alpha$</sub> ), 6.83-6.96 (m, 3H, H <sub>$\gamma$</sub> , H <sub>$\delta$</sub> , H<sub>4</sub>), 6.99-7.00 (m, 1H, H<sub>3</sub>), 7.06-7.09 (m, 1H, H<sub>2</sub>), 7.28-7.31 (d, 1H,  $J = 2.2$  Hz, H<sub>1</sub>), 7.50-7.58 (ddd, 1H,  $J_1 = 15.3$  Hz,  $J_2 = 8.3$  Hz,  $J_3 = 2.2$  Hz, H <sub>$\beta$</sub> ) ppm;  $^{13}\text{C}$  NMR (150 MHz, CDCl<sub>3</sub>, 302 K):  $\delta = 55.3$ , 112.4, 115.1, 120.1, 120.4, 126.3, 129.8, 137.2, 141.5, 146.8, 159.9, 172.2 ppm; LRMS (EI)  $m/z$  calcd. for C<sub>12</sub>H<sub>12</sub>O<sub>3</sub> [M]<sup>+</sup>: 204.1; Found 204.1. The  $^1\text{H}$  and  $^{13}\text{C}$  NMR spectra were agreed with reported literature<sup>13</sup>.

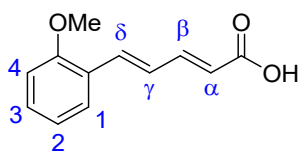

**(2E,4E)-5-(2-methoxyphenyl)penta-2,4-dienoic acid ((EE)PAD-6)**

Compound **(EE)PAD-6** (120.0 mg, 92%) as a white solid was prepared from compound **(ZE)PAD-6** (130.0 mg, 0.6 mmol) and iodine (1.6 mg) according to the general procedure **C** described above. Mp: 181°C;  $R_f$  = 0.18 (n-Hexane: EtOAc = 2:1 v/v).  $^1\text{H NMR}$  (300 MHz,  $\text{CDCl}_3$ , 297 K):  $\delta$  = 3.89 (s, 3H,  $\text{OCH}_3$ ), 5.97 (d, 1H,  $J$  = 15.3 Hz,  $\text{H}_\alpha$ ), 6.89-7.01 (m, 3H,  $\text{H}_\gamma$ ,  $\text{H}_\delta$ ,  $\text{H}_4$ ), 7.27-7.31 (m, 2H,  $\text{H}_2$ ,  $\text{H}_3$ ), 7.49-7.61 (m, 2H,  $\text{H}_\beta$ ,  $\text{H}_1$ ) ppm;  $^{13}\text{C NMR}$  (75 MHz,  $\text{CDCl}_3$ , 297 K):  $\delta$  = 55.7, 111.2, 119.6, 120.9, 125.0, 126.7, 127.7, 130.6, 137.0, 148.2, 157.8, 172.2 ppm; IR (KBr,  $\text{cm}^{-1}$ ): 3000, 2960, 2835, 2540, 1671, 1612, 1593, 1514, 1487, 1417, 1310, 1277, 1243, 1149, 1027, 1003, 748; LRMS (EI)  $m/z$  calcd. for  $\text{C}_{12}\text{H}_{12}\text{O}_3$   $[\text{M}]^+$ : 204.1; Found 204.1.

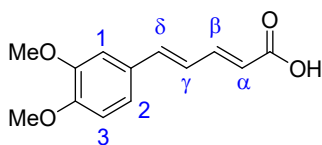

**(2E,4E)-5-(3,4-dimethoxyphenyl)penta-2,4-dienoic acid ((EE)PAD-7)**

Compound **(EE)PAD-7** (60.0 mg, 43%) as a yellow solid was prepared from compound **(ZE)PAD-7** (140.0 mg, 0.6 mmol) and iodine (1.7 mg) according to the general procedure **C** described above. Mp: 201°C;  $R_f$  = 0.05 (n-Hexane: EtOAc = 2:1 v/v).  $^1\text{H NMR}$  (300 MHz,  $\text{CDCl}_3$ , 297 K):  $\delta$  = 3.91 (s, 3H,  $\text{OCH}_3$ ), 3.93 (s, 3H,  $\text{OCH}_3$ ), 5.95 (d, 1H,  $J$  = 15.2 Hz,  $\text{H}_\alpha$ ), 6.74-6.92 (m, 3H,  $\text{H}_\gamma$ ,  $\text{H}_\delta$ ,  $\text{H}_3$ ), 7.01-7.06 (m, 2H,  $\text{H}_1$ ,  $\text{H}_2$ ), 7.49-7.57 (dd,  $J_1$  = 15.2 Hz,  $J_2$  = 10.6 Hz,  $\text{H}_\beta$ ) ppm;  $^{13}\text{C NMR}$  (75 MHz,  $\text{CDCl}_3$ , 297 K):  $\delta$  = 56.1, 56.1, 109.3, 111.3, 119.1, 121.7, 124.2, 129.1, 141.7, 147.4, 149.4, 150.5, 171.9 ppm; IR (KBr,  $\text{cm}^{-1}$ ): 2997, 2957, 2932, 2834, 2531, 1674, 1607, 1589, 1513, 1463, 1423, 1321, 1258, 1198, 1138, 1023, 1010, 872, 806, 760, 704; HRMS (EI)  $m/z$  calcd. for  $\text{C}_{13}\text{H}_{14}\text{O}_4$   $[\text{M}]^+$ : 234.1; Found 234.1.



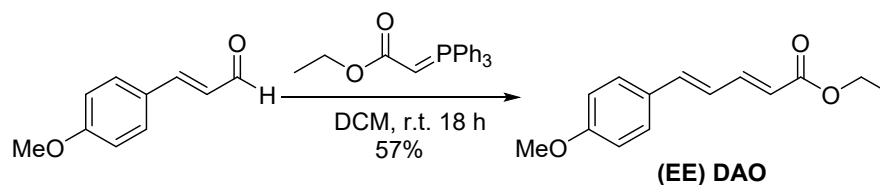

**Scheme S6.** Synthesis of (EE) DAO.

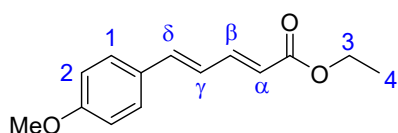

**(2E,4E)-ethyl 5-(4-methoxyphenyl)penta-2,4-dienoate ((EE) DAO)**

To a solution of (*E*)-3-(4-methoxyphenyl)acrylaldehyde (200 mg, 1.2 mmol) in dry DCM (12.5 mL) was added carbethoxymethylene)triphenylphosphorane (644 mg, 1.9 mmol). The reaction mixture was stirred at room temperature for 18 hr. After the completion of the reaction, the solvent was removed under reduced pressure and the residue was purified by column chromatography to give **(EE) DAO** (164 mg, 57%) as white solid.  $R_f = 0.37$  (n-Hexane:EtOAc = 8:1 v/v). Mp: 65°C;  $^1\text{H NMR}$  (300 MHz,  $\text{CDCl}_3$ , 297 K):  $\delta = 1.31$  (t, 3H,  $J = 7.08$  Hz,  $\text{H}_4$ ), 3.82 (s, 3H,  $\text{OCH}_3$ ), 4.22 (q, 2H,  $J = 7.98$  Hz,  $\text{H}_3$ ), 5.93 (d, 1H,  $J = 15.21$  Hz,  $\text{H}_\alpha$ ), 6.69-6.90 (m, 4H,  $\text{H}_\gamma$ ,  $\text{H}_\delta$ ,  $\text{H}_2$ ), 7.39-7.47 (m, 3H,  $\text{H}_\beta$ ,  $\text{H}_1$ ) ppm;  $^{13}\text{C NMR}$  (75 MHz,  $\text{CDCl}_3$ , 297 K):  $\delta = 14.5, 55.5, 60.4, 114.4, 120.2, 124.3, 128.8, 129.0, 140.2, 145.1, 160.5, 167.4$  ppm; IR (KBr,  $\text{cm}^{-1}$ ): 2923, 2848, 2334, 1704, 1623, 1600, 1311, 1260, 1232, 1135, 1026, 998; HRMS (ESI)  $m/z$  calcd. for  $\text{C}_{14}\text{H}_{17}\text{O}_3$  ( $[\text{M}+\text{H}]^+$ ): 233.1178; Found 233.1178.

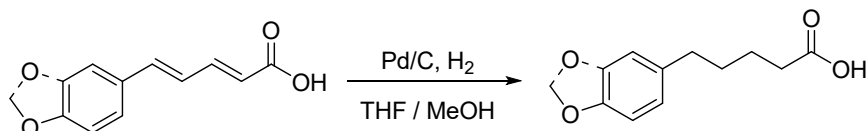

overnight. Pd/C was removed by vacuum filtration and the filtrate was concentrated under reduced pressure. The crude residues were purified by column chromatography.

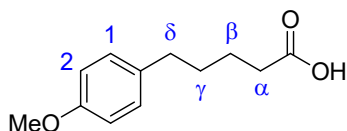

#### 5-(4-methoxyphenyl)pentanoic acid (PAD-8)

Compound **PAD-8** (47.0 mg, 46%) as a white solid was prepared from compound **(EE)PAD-4** (100.0 mg, 0.5 mmol) according to the general procedure **D** described above. Mp: 113°C;  $R_f$  = 0.14 (n-Hexane: EtOAc = 2:1 v/v).  $^1\text{H}$  NMR (300 MHz,  $\text{CDCl}_3$ , 297 K):  $\delta$  = 1.64-1.67 (m, 4H,  $\text{H}_\beta$ ,  $\text{H}_\gamma$ ), 2.37 (t, 2H,  $J$  = 14.0 Hz,  $\text{H}_\delta$ ), 2.58 (t, 2H,  $J$  = 13.8 Hz,  $\text{H}_\alpha$ ), 3.79 (s, 3H,  $\text{OCH}_3$ ), 6.81-6.84 (m, 2H,  $\text{H}_2$ ), 7.07-7.10 (m, 2H,  $\text{H}_1$ ) ppm;  $^{13}\text{C}$  NMR (75 MHz,  $\text{CDCl}_3$ , 298 K):  $\delta$  = 24.4, 31.1, 33.9, 34.7, 55.4, 113.9, 129.4, 134.2, 157.9, 179.5 ppm; LRMS (EI)  $m/z$  calcd. for  $\text{C}_{12}\text{H}_{16}\text{O}_3$   $[\text{M}]^+$ : 208.1; Found 208.1. The  $^1\text{H}$  and  $^{13}\text{C}$  NMR spectra were agreed with reported literature<sup>14</sup>.

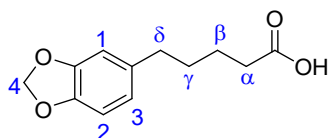

#### 5-(benzo[*d*][1,3]dioxol-5-yl)pentanoic acid (PAD-9)

Compound **PAD-9** (130.0 mg, 81%) as a white solid was prepared from compound **PA** (157.0 mg, 0.7 mmol) according to the general procedure **D** described above.  $R_f$  = 0.26 (n-Hexane: EtOAc = 2:1 v/v).  $^1\text{H}$  NMR (300 MHz,  $\text{CD}_3\text{OD}$ , 297 K):  $\delta$  = 1.59-1.62 (m, 4H,  $\text{H}_\beta$ ,  $\text{H}_\gamma$ ), 2.17 (t, 2H,  $J$  = 14.4 Hz,  $\text{H}_\delta$ ), 2.54 (t, 2H,  $J$  = 14.2 Hz,  $\text{H}_\alpha$ ), 5.86 (s, 2H,  $\text{H}_4$ ), 6.61-6.69 (m, 3H,  $\text{H}_1$ ,  $\text{H}_2$ ,  $\text{H}_3$ ) ppm;  $^{13}\text{C}$  NMR (75 MHz,  $\text{CD}_3\text{OD}$ , 298 K):  $\delta$  = 27.3, 33.1, 36.5, 39.1, 101.9, 108.8, 109.8, 122.2, 137.9, 146.9, 148.9, 182.9 ppm; LRMS (EI)  $m/z$ :  $[\text{M}]^+$  calcd. for  $\text{C}_{12}\text{H}_{14}\text{O}_4$  222.1; Found 222.1. The  $^1\text{H}$  and  $^{13}\text{C}$  NMR spectra were agreed with reported literature<sup>15</sup>.

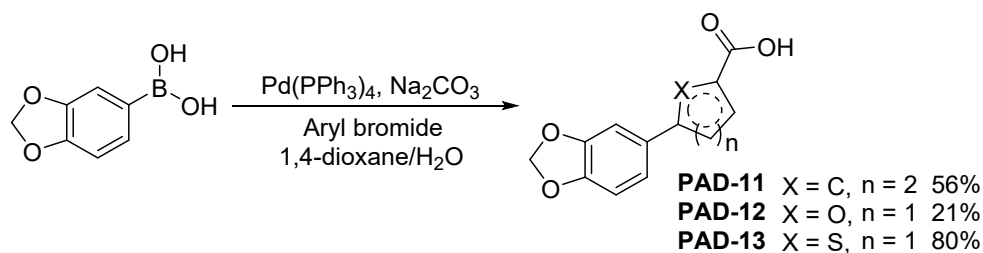

**Scheme S8.** Synthesis of PAD-11 to PAD-13

### General procedure E for the synthesis of PAD-11 to PAD-13

A solution mixture of 1,4-dioxane and water (1:1) was degassed by using argon. Boronic acid (1 eq, 1.2 mmol), aryl bromide (1 eq, 1.2 mmol), Pd(PPh<sub>3</sub>)<sub>4</sub> (2 mol%) and sodium carbonate (7 eq) were dissolved in degassed solvent (12.0 mL) and then the reaction mixture was refluxed for overnight. After the completion of the reaction, it was cooled to room temperature, diluted with brine and washed with DCM. The aqueous layer was separated and the pH value was adjusted to 1 with 1M HCl<sub>(aq)</sub>. The precipitate was removed by filtration and the filtrate was concentrated under reduced pressure to yield the crude product, or the acidified aqueous layer was extracted with additional EtOAc (the organic layer was dried over anhydrous MgSO<sub>4</sub>, filtered, and concentrated under reduced pressure). The crude product was purified by column chromatography or recrystallized with a water/EtOH solution mixture.

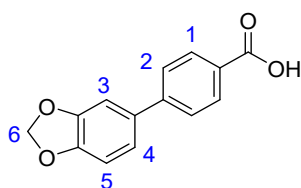

#### 4-(benzo[d][1,3]dioxol-5-yl)benzoic acid (PAD-11)

Compound **PAD-11** was obtained as a white solid (162.0 mg, 56%). Mp = 278°C; R<sub>f</sub> = 0.20 (n-Hexane: EtOAc = 1:9 v/v). <sup>1</sup>H NMR (300 MHz, d<sub>6</sub>-DMSO, 295 K): δ = 6.08 (s, 2H, H<sub>6</sub>), 7.03 (d, 1H, J = 8.1 Hz, H<sub>5</sub>), 7.22-7.25 (dd, 1H, J<sub>1</sub> = 8.1 Hz, J<sub>2</sub> = 1.8 Hz, H<sub>4</sub>), 7.32 (d, 1H, J = 1.8 Hz, H<sub>3</sub>), 7.72 (d, 2H, J = 8.4 Hz, H<sub>2</sub>), 7.96 (d, 2H, J = 8.6 Hz, H<sub>1</sub>) ppm; <sup>13</sup>C NMR (75 MHz, d<sub>6</sub>-DMSO, 295 K): δ = 101.5, 107.4, 109.0, 121.1, 126.7, 129.4,

130.1, 133.4, 144.2, 147.7, 148.3, 167.5 ppm; LRMS (EI)  $m/z$ :  $[M]^+$ calcd. for  $C_{14}H_{10}O_4$  242.1; Found 242.1. The  $^1H$  and  $^{13}C$  NMR spectra were with reported literature<sup>16</sup>.

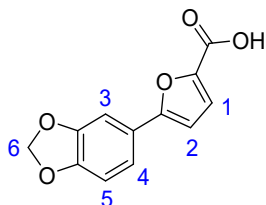

### 5-(benzo[d][1,3]dioxol-5-yl)furan-2-carboxylic acid (PAD-12)

Compound **PAD-12** was obtained as a beige solid (58.0 mg, 21%). Mp: 198–202°C;  $R_f$  = 0.20 (n-Hexane: EtOAc 1:9 v/v).  $^1H$  NMR (300 MHz,  $d_6$ -DMSO, 295 K):  $\delta$  = 6.09 (s, 2H,  $H_6$ ), 7.01-7.04 (m, 2H,  $H_5$ ,  $H_2$ ), 7.27 (d, 1H,  $J$  = 3.6 Hz,  $H_1$ ), 7.31-7.34 (dd, 1H,  $J_1$  = 8.1 Hz,  $J_2$  = 1.7 Hz,  $H_4$ ), 7.36 (d, 1H,  $J$  = 1.7 Hz,  $H_3$ ) ppm;  $^{13}C$  NMR (75 MHz,  $d_6$ -DMSO, 298 K):  $\delta$  = 101.5, 104.8, 106.9, 108.9, 118.7, 119.9, 123.5, 143.6, 148.0 (2C), 156.2, 159.3 ppm; IR (KBr,  $cm^{-1}$ ): 3109, 3002, 2912, 2682, 1681, 1585, 1497, 1473, 1333, 1317, 1232, 1164, 1037, 1023, 934, 862, 810, 792, 756; LRMS (EI)  $m/z$ :  $[M]^+$ calcd. for  $C_{12}H_8O_5$  232.0; Found 232.0.

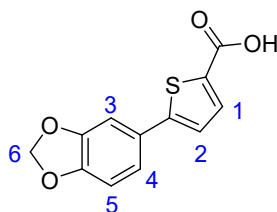

### 5-(benzo[d][1,3]dioxol-5-yl)thiophene-2-carboxylic acid (PAD-13)

Compound **PAD-13** was obtained as a light brown solid (238 mg, 80%). Mp = 243°C;  $R_f$  = 0.20 (n-Hexane: EtOAc 1:9 v/v).  $^1H$  NMR (300 MHz,  $d_6$ -DMSO, 295 K):  $\delta$  = 6.08 (s, 2H,  $H_6$ ), 6.99 (d, 1H,  $J$  = 8.1 Hz,  $H_5$ ), 7.21-7.24 (dd, 1H,  $J_1$  = 8.1 Hz,  $J_2$  = 1.9 Hz,  $H_4$ ), 7.35 (d, 1H,  $J$  = 1.8 Hz,  $H_3$ ), 7.46 (d, 1H,  $J$  = 4.0 Hz,  $H_2$ ), 7.66 (d, 1H,  $J$  = 3.9 Hz,  $H_1$ ) ppm;  $^{13}C$  NMR (75 MHz,  $d_6$ -DMSO, 296 K):  $\delta$  = 101.6, 106.3, 108.9, 120.1, 123.9, 127.1, 132.3, 134.3, 147.9, 148.2, 149.8, 162.8 ppm; LRMS (EI)  $m/z$ :  $[M]^+$ calcd. for  $C_{12}H_8O_4S$  248.0; Found 248.0. The  $^1H$  and  $^{13}C$  NMR spectra were agreed with reported literature<sup>16</sup>.

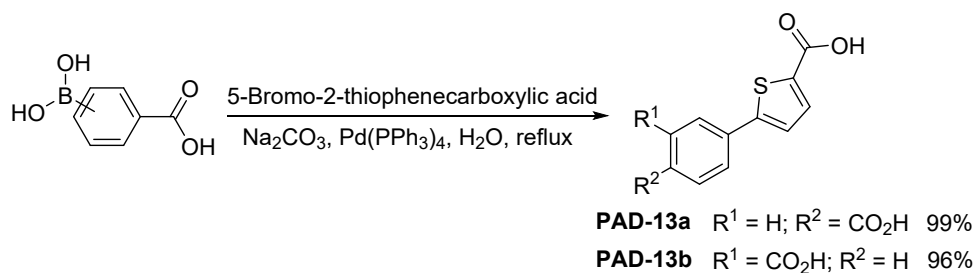

**Scheme S9.** Synthesis of PAD-13a and PAD-13b

### General procedure F for synthesis of PAD-13a and PAD-13b

5-Bromothiophene-2-carboxylic acid (1.0 equiv.), carboxyphenylboronic acid (1.1 equiv.), Na<sub>2</sub>CO<sub>3</sub> (4.5 equiv.) and Pd(PPh<sub>3</sub>)<sub>4</sub> (3 mol%) were mixed in degassed H<sub>2</sub>O. The final concentration of the reaction is 0.08 M. The reaction mixture was heated to reflux for 6 h. After that, the mixture was cooled down to room temperature. The reaction mixture was washed with DCM until the color of aqueous layer became colorless. Thereafter, the pH value of aqueous layer was adjusted with concentrated HCl to 1 under an ice bath to form precipitate. The precipitate was filtered under reduced pressure to give desired PAD-13 derivatives.

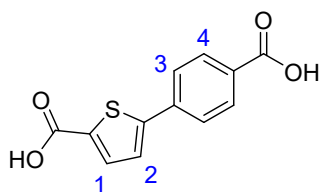

### 5-(4-carboxyphenyl)thiophene-2-carboxylic acid (PAD-13a)

Compound **PAD-13a** was obtained as a white solid (238 mg, 99 %). Mp > 300 °C. <sup>1</sup>H NMR (300 MHz, *d*<sub>6</sub>-DMSO, 308 K): δ = 7.66 (d, 1H, *J* = 3.90 Hz, H<sub>1</sub>), 7.73 (d, 1H, *J* = 3.93 Hz, H<sub>2</sub>), 7.84 (d, 2H, *J* = 8.46 Hz, H<sub>3</sub>), 7.98 (d, 2H, *J* = 6.27 Hz, H<sub>4</sub>) ppm; <sup>13</sup>C NMR (75 MHz, *d*<sub>6</sub>-DMSO, 308 K): δ = 126.3, 126.5, 127.6, 130.5, 130.7, 131.0, 134.9, 135.0, 137.1, 148.7, 163.2, 167.3 ppm; IR (KBr, cm<sup>-1</sup>): 3000 (br), 1683, 1600, 1510, 1289, 1113, 928; HRMS (ESI) *m/z* calcd. for C<sub>12</sub>H<sub>8</sub>O<sub>4</sub>S ([M+H]<sup>+</sup>): 249.0222; Found: 249.0221. The <sup>1</sup>H and <sup>13</sup>C NMR spectra were agreed with reported literature<sup>17</sup>.

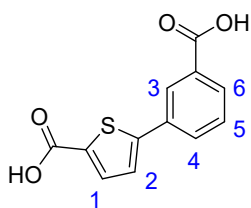

### 5-(3-carboxyphenyl)thiophene-2-carboxylic acid (PAD-13b)

Compound **PAD-13b** was further purified by washing with methanol and was afforded as a white solid (229 mg, 96 %). Mp = 296 °C.  $^1\text{H}$  NMR (300 MHz,  $d_6$ -DMSO, 312 K):  $\delta$  = 7.59 (t, 1H,  $J$  = 7.80 Hz, H<sub>5</sub>), 7.64 (d, 1H,  $J$  = 3.93 Hz, H<sub>1</sub>), 7.73 (d, 1H,  $J$  = 3.93 Hz, H<sub>2</sub>), 7.93 (d, 1H,  $J$  = 7.83 Hz, H<sub>4</sub>), 7.98 (d, 1H,  $J$  = 7.83 Hz, H<sub>6</sub>), 8.18 (s, 1H, H<sub>3</sub>) ppm;  $^{13}\text{C}$  NMR (75 MHz,  $d_6$ -DMSO, 313 K):  $\delta$  = 125.6, 126.4, 129.7, 130.0, 130.3, 132.0, 133.3, 134.0, 134.7, 148.7, 162.9, 167.0 ppm; IR (KBr,  $\text{cm}^{-1}$ ): 3000 (br), 1687, 1428, 1304, 1122, 931; HRMS (ESI)  $m/z$  calcd. for  $\text{C}_{12}\text{H}_8\text{O}_4\text{S}$  ( $[\text{M}-\text{H}]^-$ ): 247.0065; Found: 247.0066.

## References

1. Kim, S. M.; Kim, Y. S.; Kim, D. W.; Yang, J. W., Transition metal-free, NaOtBu-O<sub>2</sub>-mediated one-pot cascade oxidation of allylic alcohols to  $\alpha,\beta$ -unsaturated carboxylic acids. *Green Chem.* **2012**, *14*, 2996-2998.
2. Qu, H.; Yu, X.; Zhi, X.; Lv, M.; Xu, H., Natural-product-based insecticidal agents 14. Semisynthesis and insecticidal activity of new piperine-based hydrazone derivatives against *Mythimna separata* Walker in vivo. *Bioorg. Med. Chem. Lett.* **2013**, *23*, 5552-5557.
3. Ribeiro, T. S.; Freire-de-Lima, L.; Previato, J. O.; Mendonça-Previato, L.; Heise, N.; Freire de Lima, M. E., Toxic effects of natural piperine and its derivatives on epimastigotes and amastigotes of *Trypanosoma cruzi*. *Bioorg. Med. Chem. Lett.* **2004**, *14*, 3555-3558.
4. Sathish Kumar, B.; Singh, A.; Kumar, A.; Singh, J.; Hasanain, M.; Singh, A.; Masood, N.; Yadav, D. K.; Konwar, R.; Mitra, K.; Sarkar, J.; Luqman, S.; Pal, A.; Khan, F.; Chanda, D.; Negi, A. S., Synthesis of neolignans as microtubule stabilisers. *Bioorg. Med. Chem.* **2014**, *22*, 1342-1354.
5. Do, V.-M.; Tran, C.-L.; Duong, T.-H.; Phan, H.-V.-T.; Nguyen, H.-H.; Nguyen, T.-P.; Sichaem, J., Chemical constituents of the leaves of *Polyscias fruticosa*. *Chem. Nat. Compd.* **2021**, *57* (6), 1125-1127.
6. Li, Y.; Dai, F.; Jin, X. L.; Ma, M. M.; Wang, Y. H.; Ren, X. R.; Zhou, B., An effective strategy to develop active cinnamic acid-directed antioxidants based on elongating the conjugated chains. *Food Chem.* **2014**, *158*, 41-47.
7. West, T. H.; Daniels, D. S. B.; Slawin, A. M. Z.; Smith, A. D., An isothioureacatalyzed asymmetric [2,3]-rearrangement of allylic ammonium ylides. *J. Am. Chem. Soc.* **2014**, *136*, 4476-4479.
8. Mohite, A. R.; Bhat, R. G., A practical and convenient protocol for the synthesis of (E)- $\alpha,\beta$ -unsaturated acids. *Org. Lett.* **2013**, *15* (17), 4564-4567.
9. Sun, H.-y.; Hua, Q.; Guo, F.-f.; Wang, Z.-y.; Huang, W.-x., Selective aerobic oxidation of alcohols by using manganese oxide nanoparticles as an efficient heterogeneous catalyst. *Adv. Synth. Catal.* **2012**, *354*, 569-573.
10. Leduc, A. B.; Jamison, T. F., Continuous flow oxidation of alcohols and aldehydes utilizing bleach and catalytic tetrabutylammonium bromide. *Org. Process Res. Dev.* **2011**, *16*, 1082-1089.
11. Zhang, G.; Wang, Y.; Wen, X.; Ding, C.; Li, Y., Dual-functional click-triazole: a metal chelator and immobilization linker for the construction of a heterogeneous palladiumcatalyst and its application for the aerobic oxidation of alcohols. *Chem. Commun.* **2012**, *48*, 2979-2981.

12. Korsager, S.; Taaning, R. H.; Lindhardt, A. T.; Skrydstrup, T., Reductive carbonylation of aryl halides employing a two-chamber reactor: A protocol for the synthesis of aryl aldehydes including <sup>13</sup>C- and D-isotope labeling. *J. Org. Chem.* **2013**, *78*, 6112-6120.
13. Al-Huniti, M. H.; Perez, M. A.; Garr, M. K.; Croatt, M. P., Palladium-catalyzed chemoselective protodecarboxylation of polyenoic Acids. *Org. Lett.* **2018**, *20*, 7375-7379.
14. Borjesson, M.; Moragas, T.; Martin, R., Ni-catalyzed carboxylation of unactivated alkyl chlorides with CO<sub>2</sub>. *J. Am. Chem. Soc.* **2016**, *138*, 7504-7507.
15. Motiwala, H. F.; Vekariya, R. H.; Aube, J., Intramolecular friedel–crafts acylation reaction promoted by 1,1,1,3,3,3-hexafluoro-2-propanol. *Org. Lett.* **2015**, *17*, 5484-5487.
16. Schoffmann, A.; Wimmer, L.; Goldmann, D.; Khom, S.; Hintersteiner, J.; Baburin, I.; Schwarz, T.; Hintersteiner, M.; Pakfeifer, P.; Oufir, M.; Hamburger, M.; Erker, T.; Ecker, G. F.; Mihovilovic, M. D.; Hering, S., Efficient modulation of  $\gamma$ -aminobutyric acid type A receptors by piperine derivatives. *J. Med. Chem.* **2014**, *57*, 5602-5619.
17. Racanè, L.; Tralić-Kulenović, V.; Boykin, D. W.; Karminski-Zamola, G., Synthesis of new cyano-substituted bis-benzothiazolyl arylfurans and arylthiophenes. *Molecules* **2003**, *8* (3), 342-348.



# <sup>1</sup>H and <sup>13</sup>C NMR Spectra

191105-CNA

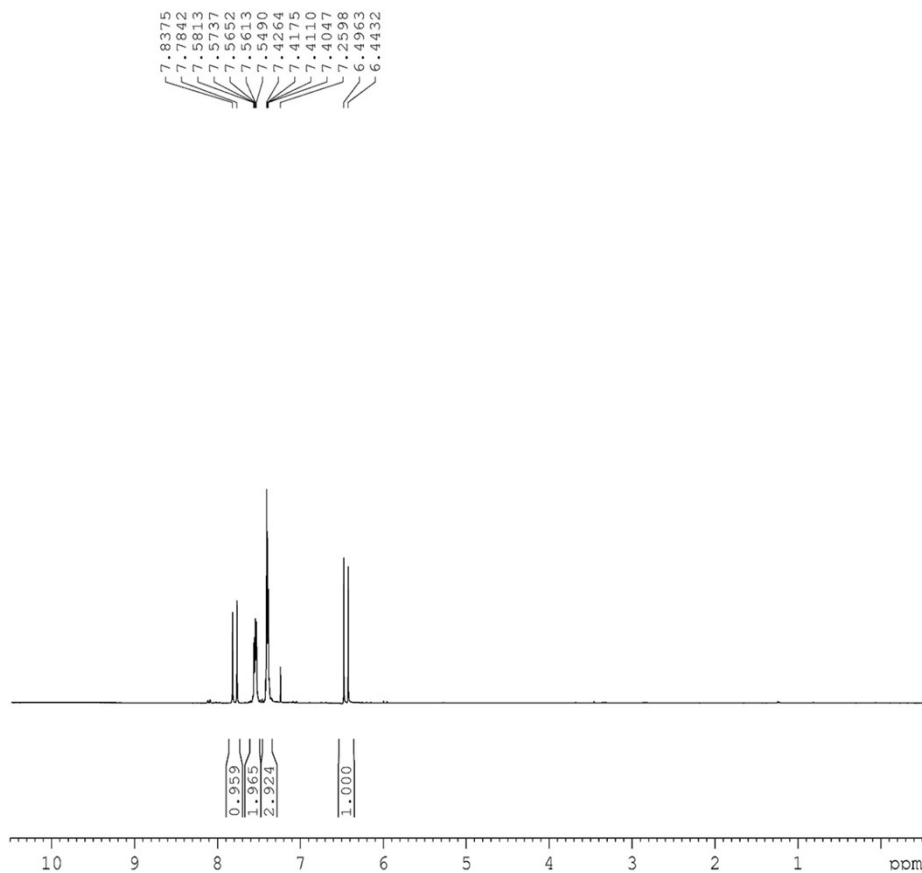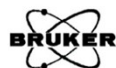

```

NAME      191105-CNA
EXPNO     1
PROCNO    1
Date_     20191105
Time      14.19
INSTRUM   spect
PROBHD    5 mm PABBO BB-
PULPROG   zg30
TD        32768
SOLVENT   CDCl3
NS        16
DS        0
SWH       6009.615 Hz
FIDRES    0.183399 Hz
AQ        2.7263477 se
RG        219.17
DW        83.200 us
DE        12.63 us
TE        296.6 K
D1        2.0000000 se
TD0       1
    
```

```

===== CHANNEL f1 =====
SFO1     300.1318008 MHz
NUC1     1H
P1       14.00 us
SI       16384
SF       300.1300072 MHz
WDW      EM
SSB      0
LB       0.00 Hz
GB       0
PC       1.00
    
```

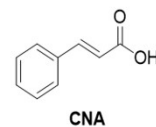

191105-CNA-13C

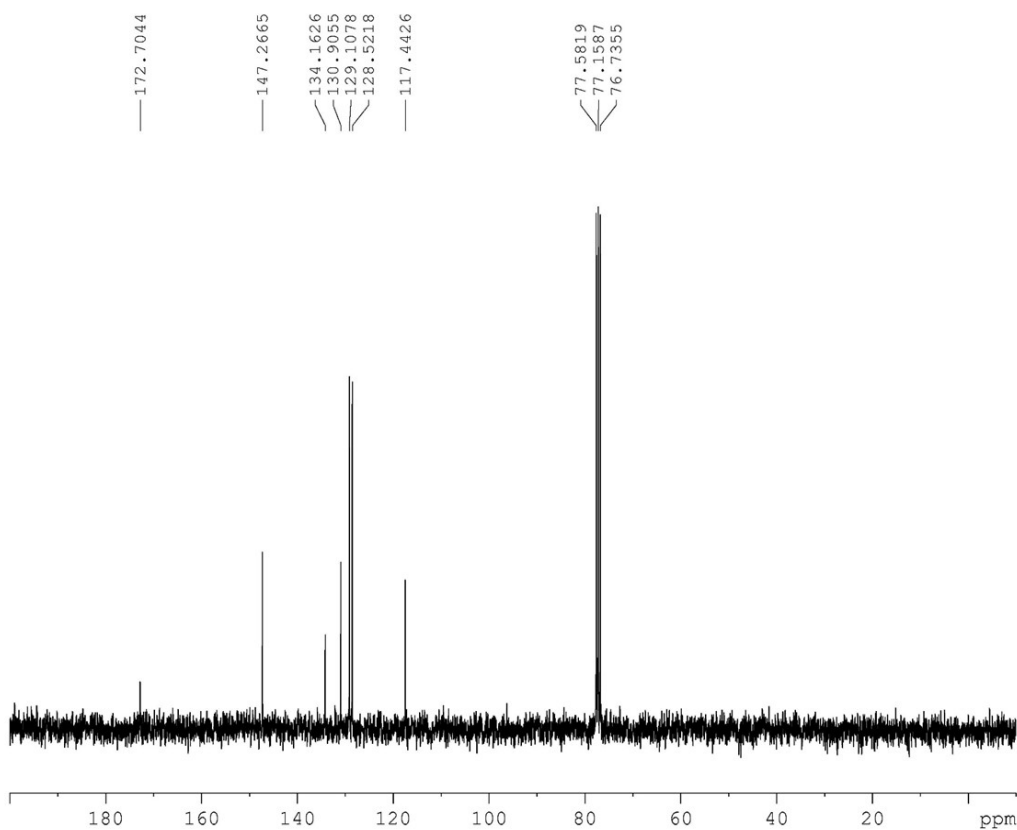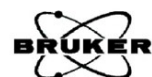

```

NAME      191105-CNA
EXPNO     2
PROCNO    1
Date_     20191105
Time      14.21
INSTRUM   spect
PROBHD    5 mm PABBO BB-
PULPROG   zgpg30
TD        32768
SOLVENT   CDCl3
NS        33
DS        0
SWH       18028.846 Hz
FIDRES    0.550197 Hz
AQ        0.9088159 sec
RG        219.17
DW        27.733 usec
DE        6.50 usec
TE        296.6 K
D1        2.0000000 sec
TD0       1
    
```

```

===== CHANNEL f1 =====
SFO1     75.4756726 MHz
NUC1     13C
P1       10.00 usec
SI       32768
SF       75.4677399 MHz
WDW      EM
SSB      0
LB       2.00 Hz
GB       0
PC       1.00
    
```

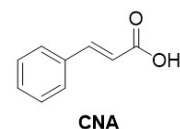

190104\_314107-brown

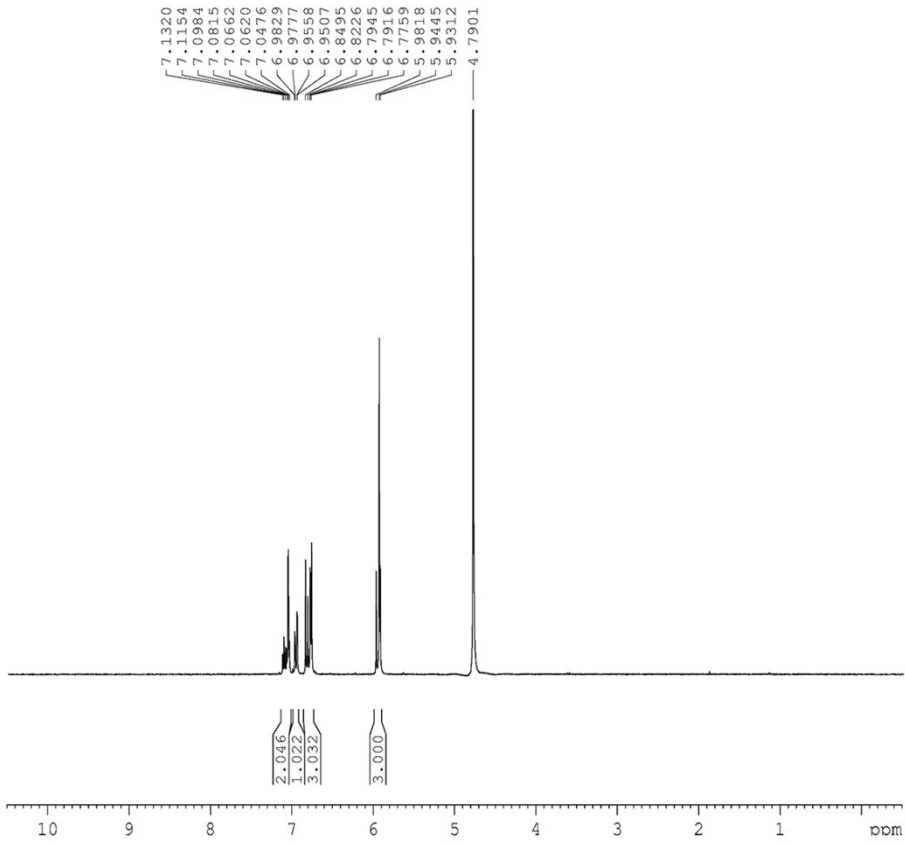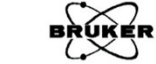

```

NAME 190104_314107-bro
EXPNO 1901 1
PROCNO NAME 1901 1
Date_ 20190104
Time 12.51
INSTRUM spect
PROBHD 5 mm PABBO BB-
PULPROG zg30
TD 32768
SOLVENT D2O
NS 16
DS 0
SWH 6009.615 Hz
FIDRES 0.183399 Hz
AQ 2.7263477 se
RG 219.17
DW 83.200 us
DE 12.53 us
TE 294.9 K
D1 2.00000000 se
TD0 1
  
```

```

===== CHANNEL f1 =====
SFO1 300.1318008 MH
NUC1 1H
P1 14.50 us
SI 16384
SF 300.1299730 MH
WDW EM
SSB 0
LB 0.00 Hz
GB 0
PC 1.00
  
```

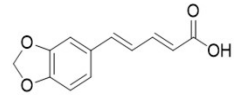

191230-PA-DMSO+D2O-13C

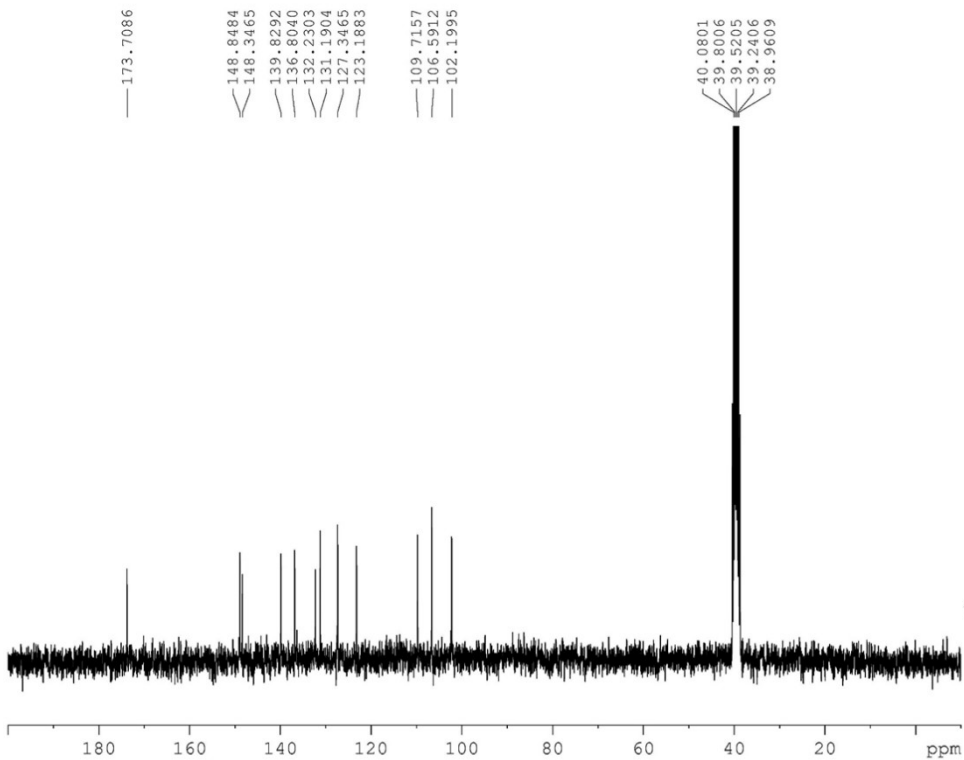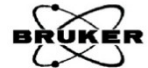

```

NAME 191230-PA-DMSO+D
EXPNO 2
PROCNO 1
Date_ 20191230
Time 17.42
INSTRUM spect
PROBHD 5 mm PABBO BB-
PULPROG zgpg30
TD 32768
SOLVENT DMSO
NS 384
DS 0
SWH 18028.846 Hz
FIDRES 0.550197 Hz
AQ 0.9088159 sec
RG 219.17
DW 27.733 usec
DE 6.50 usec
TE 297.6 K
D1 2.00000000 sec
D11 0.03000000 sec
TD0 1
  
```

```

===== CHANNEL f1 =====
SFO1 75.4756726 MHz
NUC1 13C
P1 10.00 usec
SI 32768
SF 75.4676937 MHz
WDW EM
SSB 0
LB 2.00 Hz
GB 0
PC 1.00
  
```

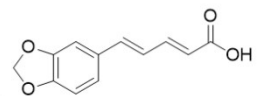

191105-314130

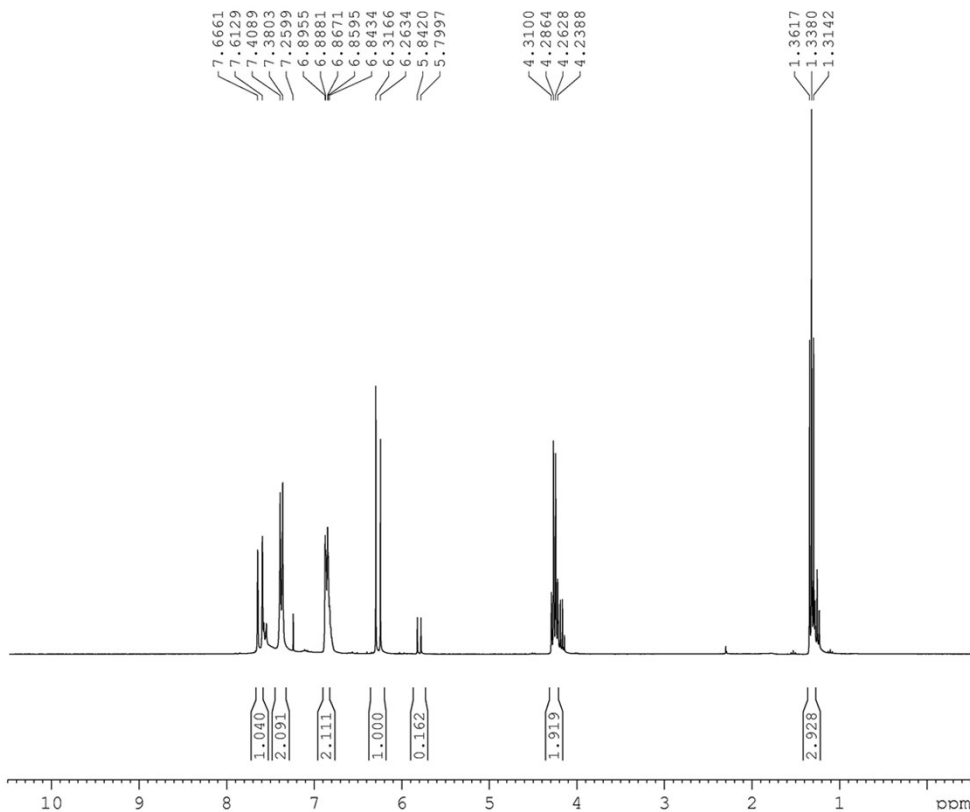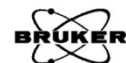

NAME 191105-314130  
 EXPNO 1  
 PROCNO NAME 191 1  
 Date\_ 20191105  
 Time 14.11  
 INSTRUM spect  
 PROBHD 5 mm PABBO BB-  
 PULPROG zg30  
 TD 32768  
 SOLVENT CDCl3  
 NS 16  
 DS 0  
 SWH 6009.615 Hz  
 FIDRES 0.183399 Hz  
 AQ 2.7263477 se  
 RG 121.85  
 DW 83.200 us  
 DE 12.63 us  
 TE 296.5 K  
 D1 2.0000000 se  
 TDO 1

===== CHANNEL f1 =====  
 SFO1 300.1318008 MH:  
 NUC1 1H  
 P1 14.00 us  
 SI 16384  
 SF 300.1300072 MH:  
 WDW EM  
 SSB 0  
 LB 0.00 Hz  
 GB 0  
 PC 1.00

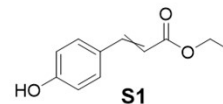

191105-314130-13C

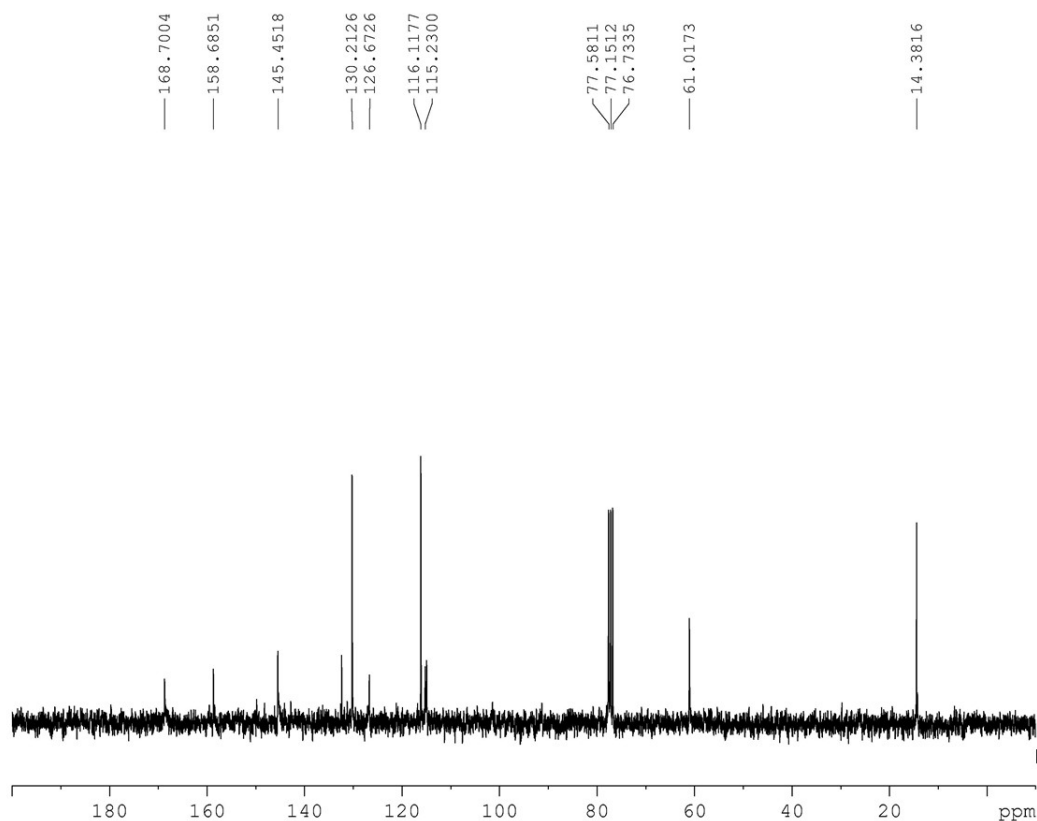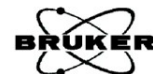

NAME 191105-314130  
 EXPNO 2  
 PROCNO 1  
 Date\_ 20191105  
 Time 14.12  
 INSTRUM spect  
 PROBHD 5 mm PABBO BB-  
 PULPROG zgpg30  
 TD 32768  
 SOLVENT CDCl3  
 NS 33  
 DS 0  
 SWH 18028.846 Hz  
 FIDRES 0.550197 Hz  
 AQ 0.9088159 sec  
 RG 219.17  
 DW 27.733 usec  
 DE 6.50 usec  
 TE 296.5 K  
 D1 2.0000000 sec  
 TDO 1

===== CHANNEL f1 =====  
 SFO1 75.4756726 MHz  
 NUC1 13C  
 P1 10.00 usec  
 SI 32768  
 SF 75.4677424 MHz  
 WDW EM  
 SSB 0  
 LB 2.00 Hz  
 GB 0  
 PC 1.00

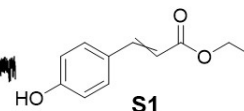

191105-314134

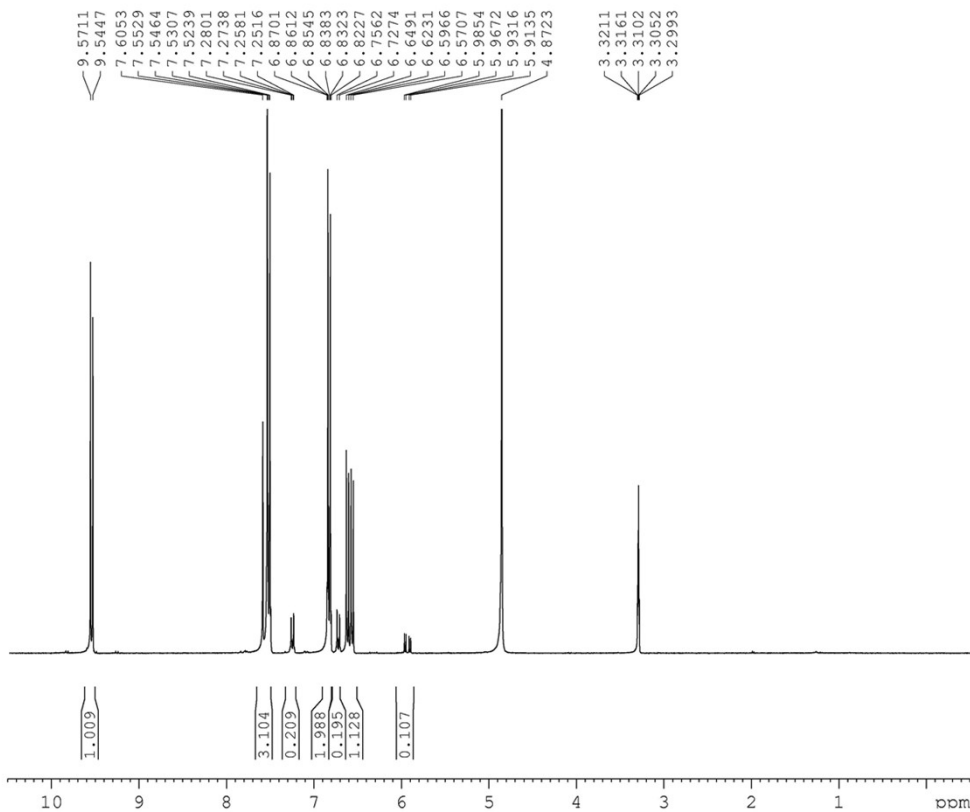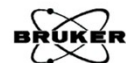

NAME 191105-314134  
 EXPNO 1  
 PROCNO NAME 191 1  
 Date\_ 20191105  
 Time 14.56  
 INSTRUM spect  
 PROBHD 5 mm PABBO BB-  
 PULPROG zg30  
 TD 32768  
 SOLVENT MeOD  
 NS 16  
 DS 0  
 SWH 6009.615 Hz  
 FIDRES 0.183399 Hz  
 AQ 2.7263477 se  
 RG 219.17  
 DW 83.200 us  
 DE 12.63 us  
 TE 296.7 K  
 D1 2.0000000 se  
 TDO 1

===== CHANNEL f1 =====  
 SFO1 300.1318008 MH  
 NUC1 1H  
 P1 14.00 us  
 SI 16384  
 SF 300.1300057 MH  
 WDW EM  
 SSB 0  
 LB 0.00 Hz  
 GB 0  
 PC 1.00

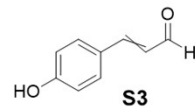

191105-314134-13C

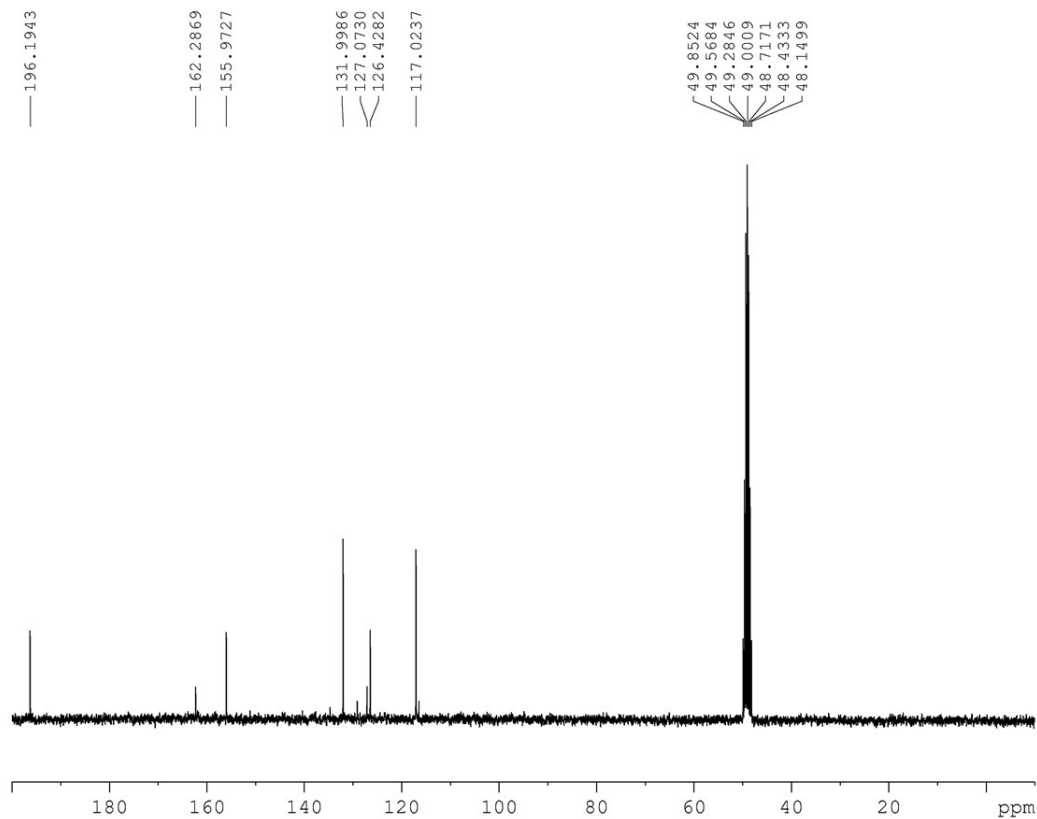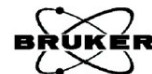

NAME 191105-314134  
 EXPNO 3  
 PROCNO 1  
 Date\_ 20191105  
 Time 15.05  
 INSTRUM spect  
 PROBHD 5 mm PABBO BB-  
 PULPROG zgpg30  
 TD 32768  
 SOLVENT MeOD  
 NS 129  
 DS 0  
 SWH 18028.846 Hz  
 FIDRES 0.550197 Hz  
 AQ 0.9088159 sec  
 RG 219.17  
 DW 27.733 usec  
 DE 6.50 usec  
 TE 297.2 K  
 D1 2.0000000 sec  
 TDO 1

===== CHANNEL f1 =====  
 SFO1 75.4756726 MHz  
 NUC1 13C  
 P1 10.00 usec  
 SI 32768  
 SF 75.4676440 MHz  
 WDW EM  
 SSB 0  
 LB 2.00 Hz  
 GB 0  
 PC 1.00

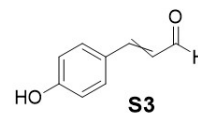

191105-AA

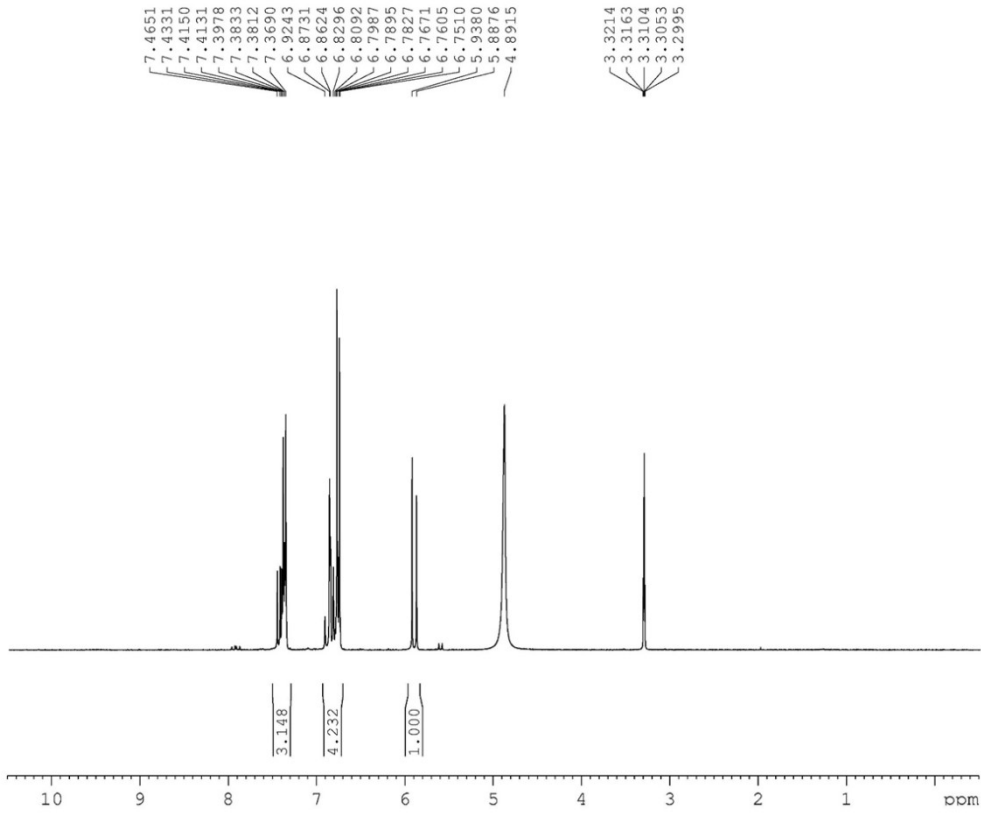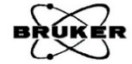

NAME 191105-AA  
EXPNO 1  
PROCNO 1  
Date\_ 20191105  
Time 15.18  
INSTRUM spect  
PROBHD 5 mm PABBO BB-  
PULPROG zg30  
TD 32768  
SOLVENT MeOD  
NS 16  
DS 0  
SWH 6009.615 Hz  
FIDRES 0.183399 Hz  
AQ 2.7263477 se  
RG 219.17  
DW 83.200 us  
DE 12.63 us  
TE 296.9 K  
D1 2.00000000 se  
TD0 1

===== CHANNEL f1 =====  
SFO1 300.1318008 MH  
NUC1 1H  
P1 14.00 us  
SI 16384  
SF 300.1300053 MH  
WDW EM  
SSB 0  
LB 0.00 Hz  
GB 0  
PC 1.00

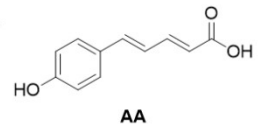

191105-AA-13C

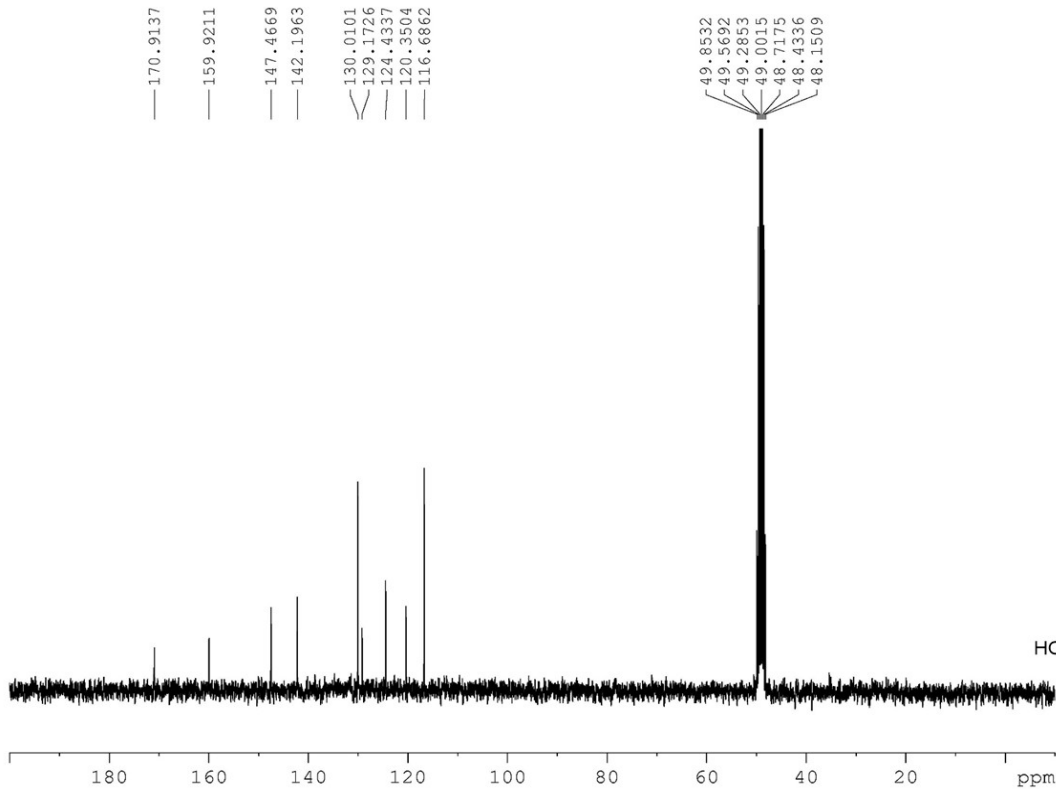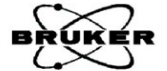

NAME 191105-AA  
EXPNO 2  
PROCNO 1  
Date\_ 20191105  
Time 15.20  
INSTRUM spect  
PROBHD 5 mm PABBO BB-  
PULPROG zgpg30  
TD 32768  
SOLVENT MeOD  
NS 129  
DS 0  
SWH 18028.846 Hz  
FIDRES 0.550197 Hz  
AQ 0.9088159 sec  
RG 219.17  
DW 27.733 usec  
DE 6.50 usec  
TE 296.8 K  
D1 2.00000000 sec  
TD0 1

===== CHANNEL f1 =====  
SFO1 75.4756726 MHz  
NUC1 13C  
P1 10.00 usec  
SI 32768  
SF 75.4676433 MHz  
WDW EM  
SSB 0  
LB 2.00 Hz  
GB 0  
PC 1.00

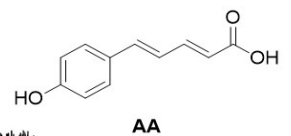

191109-318324

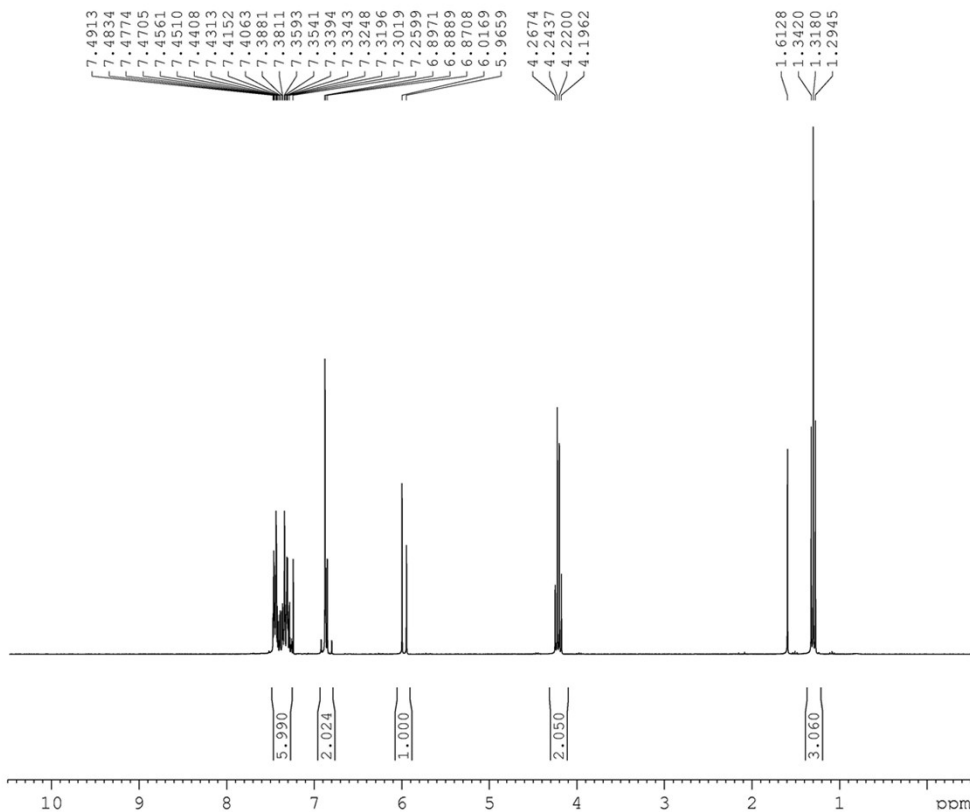

NAME 191109-318324  
EXPNO 1  
PROCNO NAME 191 1  
Date\_ 20191109  
Time 16.42  
INSTRUM spect  
PROBHD 5 mm PABBO BB-  
PULPROG zg30  
TD 32768  
SOLVENT CDCl3  
NS 16  
DS 0  
SWH 6009.615 Hz  
FIDRES 0.183399 Hz  
AQ 2.7263477 se  
RG 219.17  
DW 83.200 us  
DE 12.63 us  
TE 296.4 K  
D1 2.00000000 se  
TD0 1

==== CHANNEL f1 =====  
SFO1 300.1318008 MH  
NUC1 1H  
P1 14.00 us  
SI 16384  
SF 300.1300072 MH  
WDW EM  
SSB 0  
LB 0.00 Hz  
GB 0  
PC 1.00

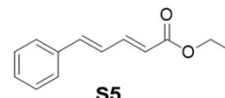

191109-318324-13C

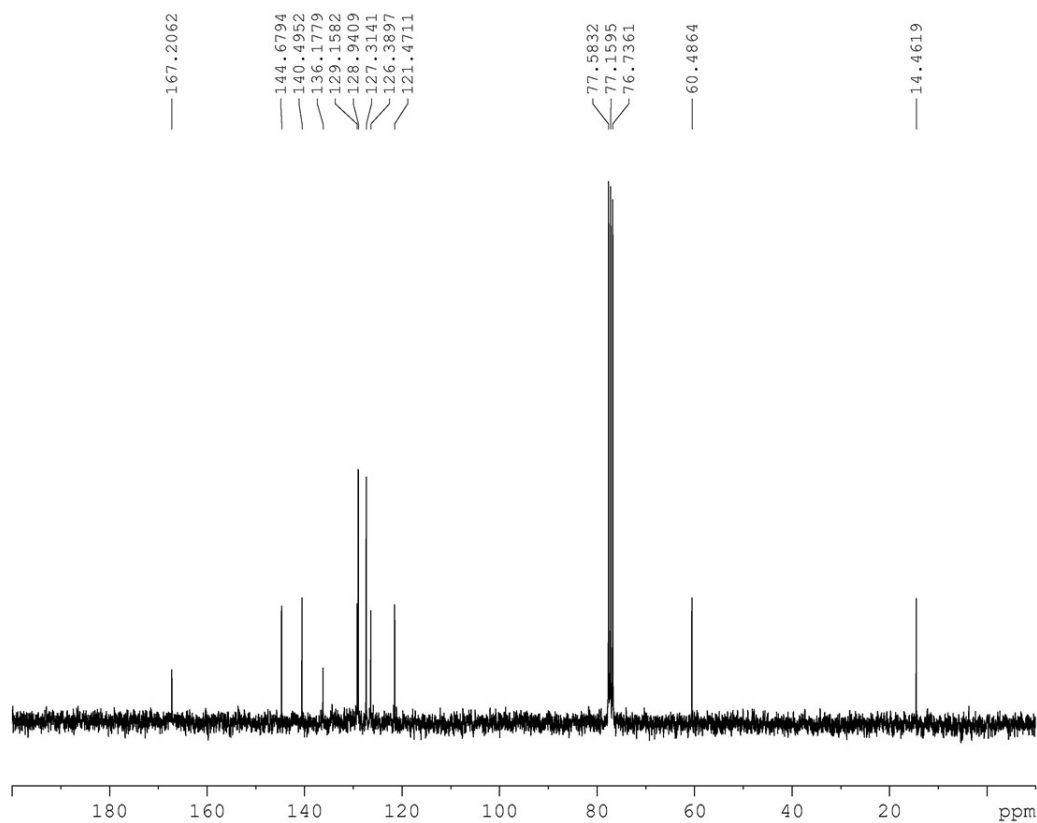

NAME 191109-318324  
EXPNO 2  
PROCNO 13C  
Date\_ 20191109  
Time 16.47  
INSTRUM spect  
PROBHD 5 mm PABBO BB-  
PULPROG zgpg30  
TD 32768  
SOLVENT CDCl3  
NS 128  
DS 0  
SWH 18028.846 Hz  
FIDRES 0.550197 Hz  
AQ 0.9088159 sec  
RG 219.17  
DW 27.733 usec  
DE 6.50 usec  
TE 296.8 K  
D1 2.00000000 sec  
D11 0.03000000 sec  
TD0 1

==== CHANNEL f1 =====  
SFO1 75.4756726 MHz  
NUC1 13C  
P1 10.00 usec  
SI 32768  
SF 75.4677393 MHz  
WDW EM  
SSB 0  
LB 2.00 Hz  
GB 0  
PC 1.00

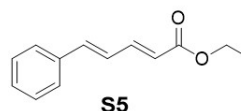

191113-314191

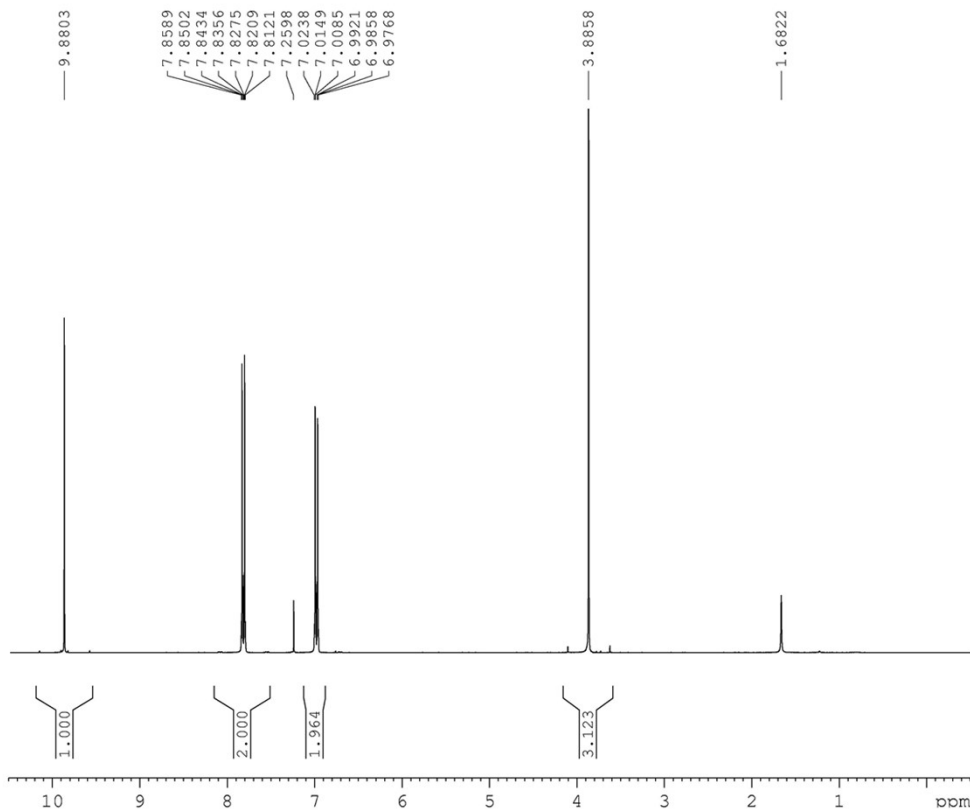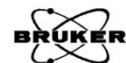

NAME 191113-314191  
EXPNO 1  
PROCNO NAME 191 1  
Date\_ 20191113  
Time 18.23  
INSTRUM spect  
PROBHD 5 mm PABBO BB-  
PULPROG zg30  
TD 32768  
SOLVENT CDCl3  
NS 16  
DS 0  
SWH 6009.615 Hz  
FIDRES 0.183399 Hz  
AQ 2.7263477 se  
RG 219.17  
DW 83.200 us  
DE 12.63 us  
TE 295.8 K  
D1 2.0000000 se  
TD0 1

===== CHANNEL f1 =====  
SFO1 300.1318008 MH  
NUC1 1H  
P1 14.00 us  
SI 16384  
SF 300.1300072 MH  
WDW EM  
SSB 0  
LB 0.00 Hz  
GB 0  
PC 1.00

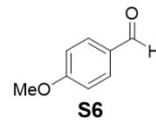

191113-314191-13C

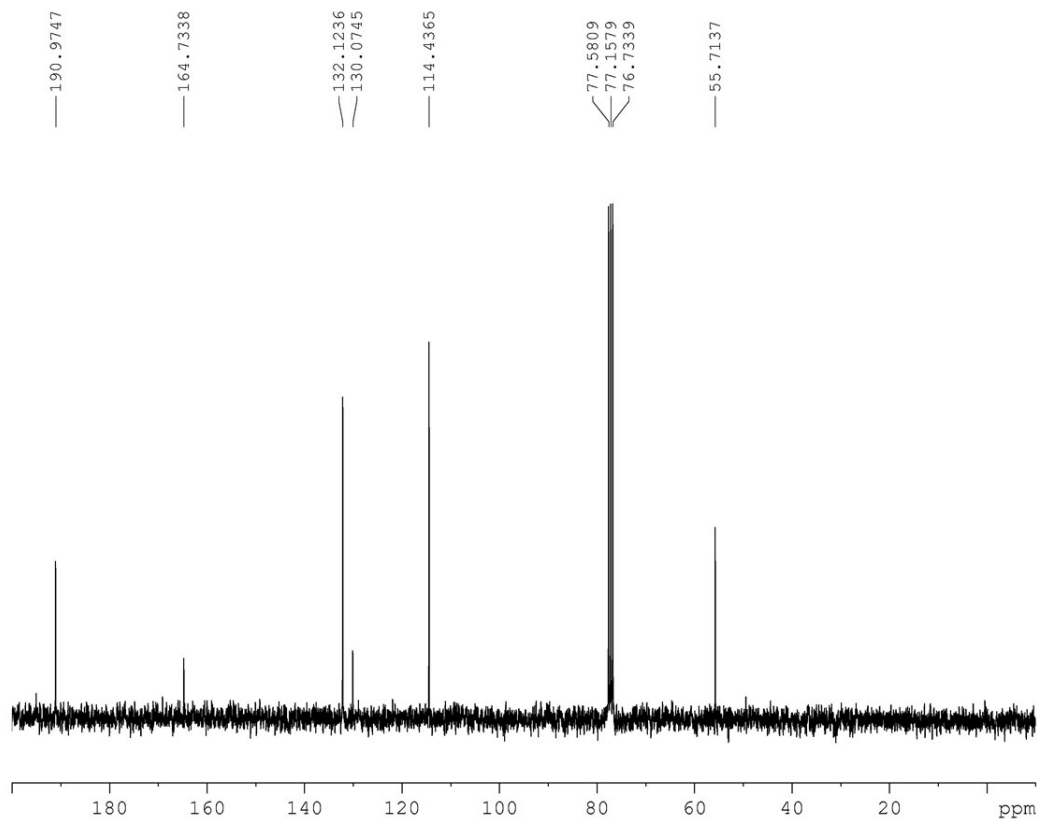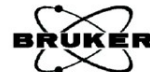

NAME 191113-314191  
EXPNO 2  
PROCNO 1  
Date\_ 20191113  
Time 18.27  
INSTRUM spect  
PROBHD 5 mm PABBO BB-  
PULPROG zgpg30  
TD 32768  
SOLVENT CDCl3  
NS 64  
DS 0  
SWH 18028.846 Hz  
FIDRES 0.550197 Hz  
AQ 0.9088159 sec  
RG 219.17  
DW 27.733 usec  
DE 6.50 usec  
TE 296.1 K  
D1 2.0000000 sec  
D11 0.03000000 sec  
TD0 1

===== CHANNEL f1 =====  
SFO1 75.4756726 MHz  
NUC1 13C  
P1 10.00 usec  
SI 32768  
SF 75.4677403 MHz  
WDW EM  
SSB 0  
LB 2.00 Hz  
GB 0  
PC 1.00

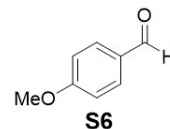

191107-314194

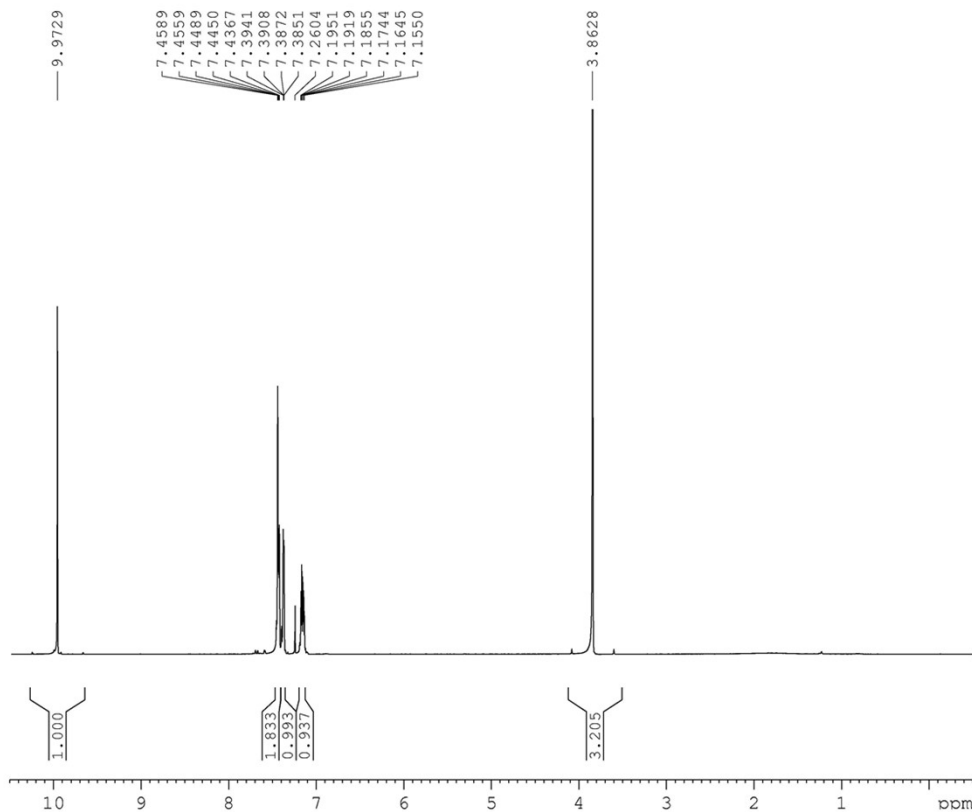

NAME 191107-314194  
 EXPNO 1  
 PROCNO NAME 191 1  
 Date\_ 20191107  
 Time 15.34  
 INSTRUM spect  
 PROBHD 5 mm PABBO BB-  
 PULPROG zg30  
 TD 32768  
 SOLVENT CDCl3  
 NS 16  
 DS 0  
 SWH 6009.615 Hz  
 FIDRES 0.183399 Hz  
 AQ 2.7263477 se  
 RG 219.17  
 DW 83.200 us  
 DE 12.63 us  
 TE 296.7 K  
 D1 2.00000000 se  
 TDO 1

===== CHANNEL f1 =====  
 SFO1 300.1318008 MH  
 NUC1 1H  
 P1 14.00 us  
 SI 16384  
 SF 300.1300067 MH  
 WDW EM  
 SSB 0  
 LB 0.00 Hz  
 GB 0  
 PC 1.00

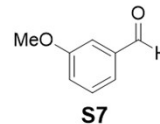

191107-314194-13C

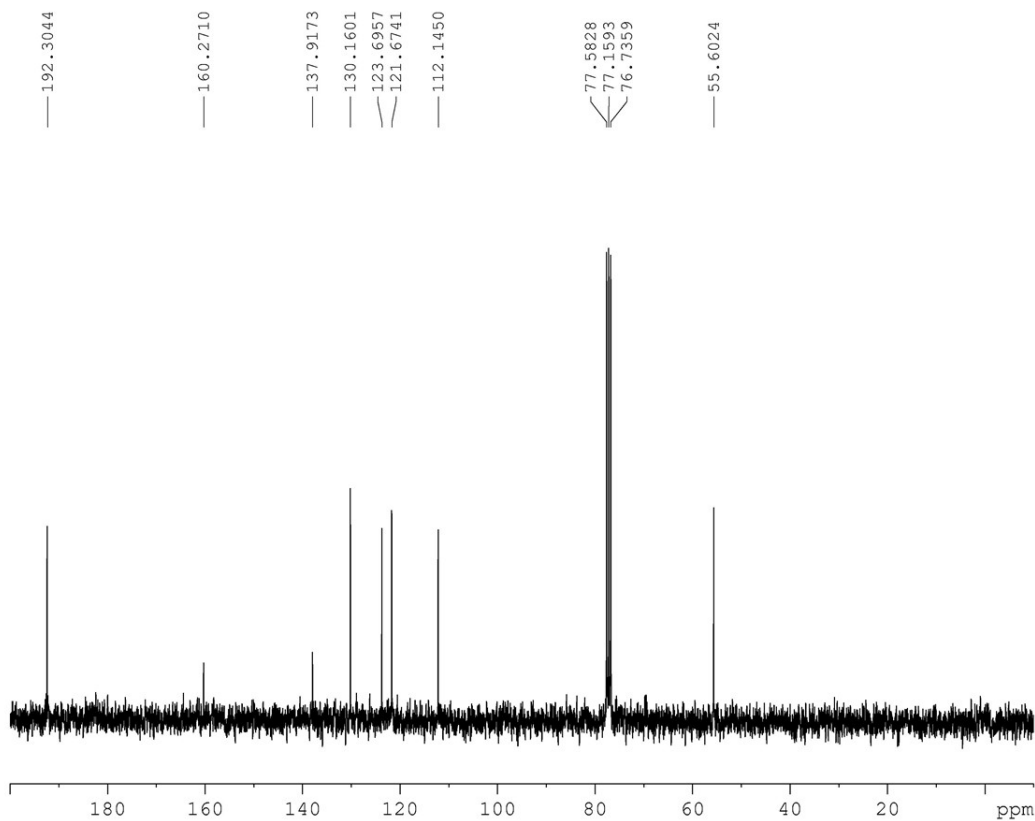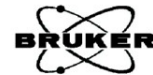

NAME 191107-314194  
 EXPNO 2  
 PROCNO 1  
 Date\_ 20191107  
 Time 15.36  
 INSTRUM spect  
 PROBHD 5 mm PABBO BB-  
 PULPROG zgpg30  
 TD 32768  
 SOLVENT CDCl3  
 NS 33  
 DS 0  
 SWH 18028.846 Hz  
 FIDRES 0.550197 Hz  
 AQ 0.9088159 sec  
 RG 219.17  
 DW 27.733 usec  
 DE 6.50 usec  
 TE 296.7 K  
 D1 2.00000000 sec  
 TDO 1

===== CHANNEL f1 =====  
 SFO1 75.4756726 MHz  
 NUC1 13C  
 P1 10.00 usec  
 SI 32768  
 SF 75.4677403 MHz  
 WDW EM  
 SSB 0  
 LB 2.00 Hz  
 GB 0  
 PC 1.00

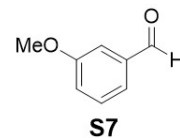



191107-314195

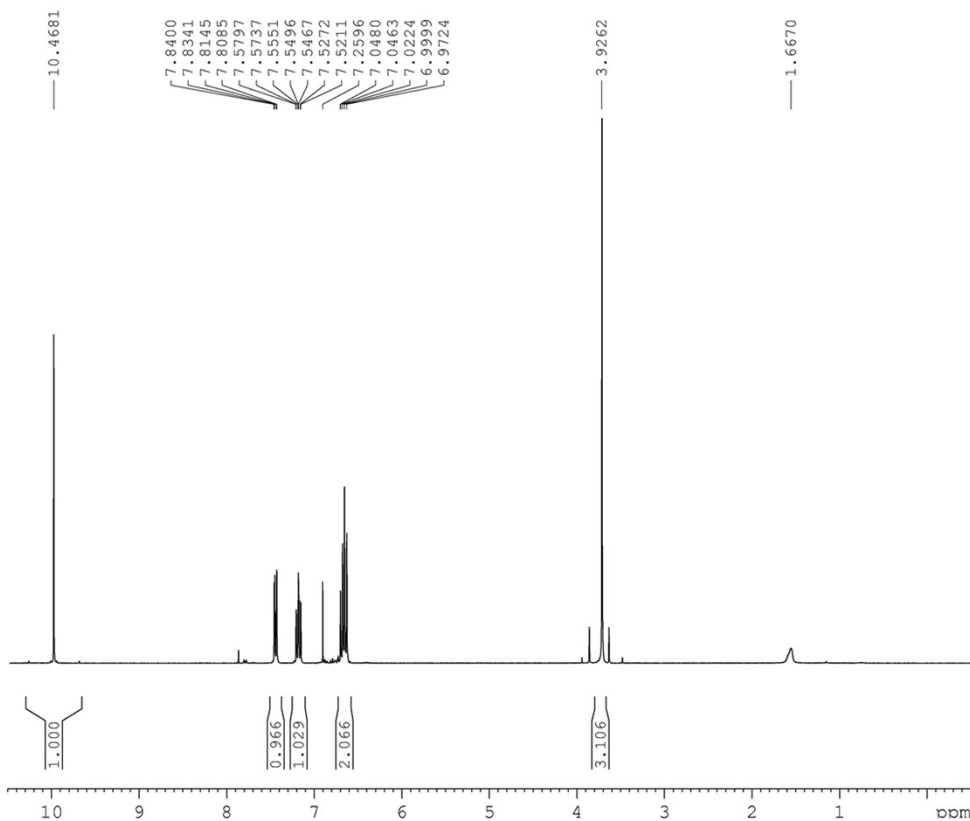

NAME 191107-314195  
 EXPNO 1  
 PROCNO NAME 191 1  
 Date\_ 20191107  
 Time 15.42  
 INSTRUM spect  
 PROBHD 5 mm PABBO BB-  
 PULPROG zg30  
 TD 32768  
 SOLVENT CDCl3  
 NS 16  
 DS 0  
 SWH 6009.615 Hz  
 FIDRES 0.183399 Hz  
 AQ 2.7263477 se  
 RG 219.17  
 DW 83.200 us  
 DE 12.63 us  
 TE 296.7 K  
 D1 2.0000000 se  
 TD0 1

===== CHANNEL f1 =====  
 SF01 300.1318008 MH  
 NUC1 1H  
 P1 14.00 us  
 SI 16384  
 SF 300.1300072 MH  
 WDW EM  
 SSB 0  
 LB 0.00 Hz  
 GB 0  
 PC 1.00

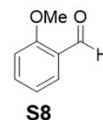

191107-314195-13C

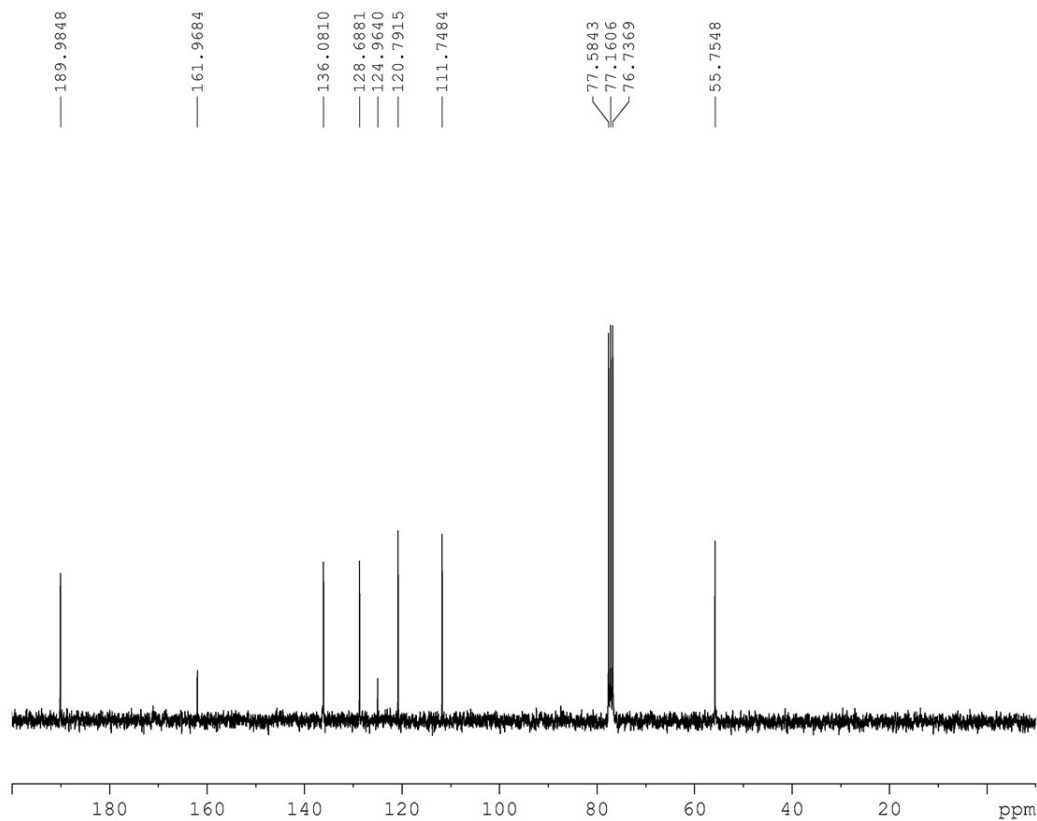

NAME 191107-314195  
 EXPNO 3  
 PROCNO 13C  
 Date\_ 20191107  
 Time 20.30  
 INSTRUM spect  
 PROBHD 5 mm PABBO BB-  
 PULPROG zgpg30  
 TD 32768  
 SOLVENT CDCl3  
 NS 128  
 DS 0  
 SWH 18028.846 Hz  
 FIDRES 0.550197 Hz  
 AQ 0.9088159 sec  
 RG 219.17  
 DW 27.733 usec  
 DE 6.50 usec  
 TE 296.7 K  
 D11 2.0000000 sec  
 D1 0.03000000 sec  
 TD0 1

===== CHANNEL f1 =====  
 SF01 75.4756726 MHz  
 NUC1 13C  
 P1 10.00 usec  
 SI 32768  
 SF 75.4677400 MHz  
 WDW EM  
 SSB 0  
 LB 2.00 Hz  
 GB 0  
 PC 1.00

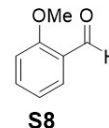

191104-314192

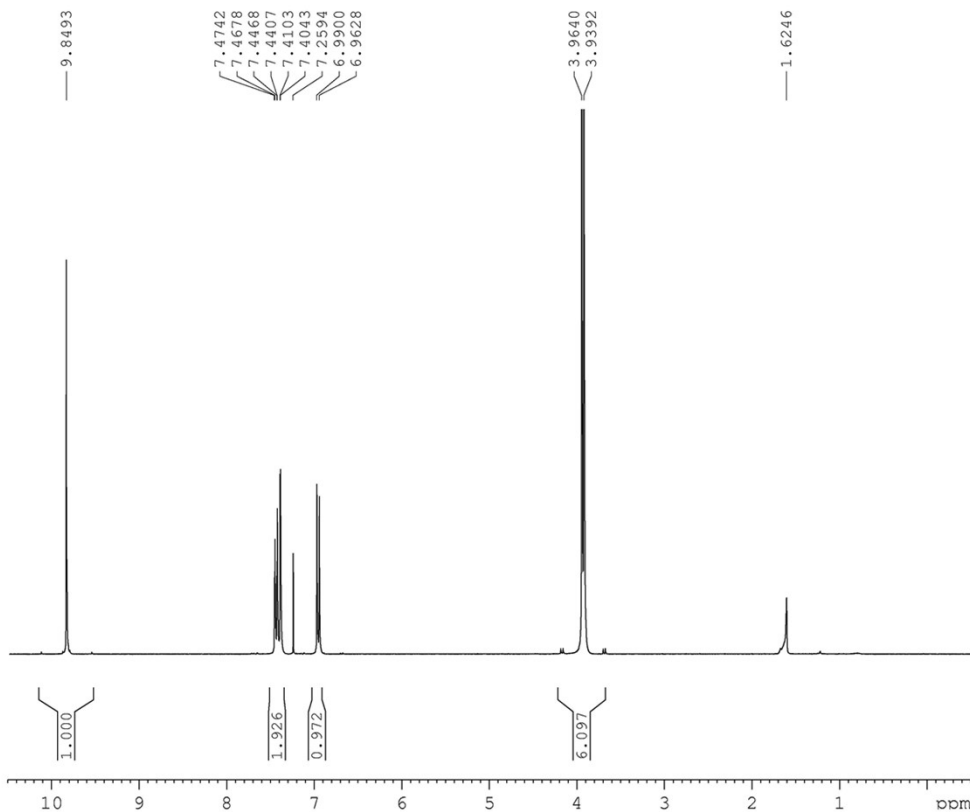

NAME 191104-314192  
 EXPNO 1  
 PROCNO NAME 191 1  
 Date\_ 20191104  
 Time 16.09  
 INSTRUM spect  
 PROBHD 5 mm PABBO BB-  
 PULPROG zg30  
 TD 32768  
 SOLVENT CDCl3  
 NS 16  
 DS 0  
 SWH 6009.615 Hz  
 FIDRES 0.183399 Hz  
 AQ 2.7263477 se  
 RG 219.17  
 DW 83.200 us  
 DE 12.63 us  
 TE 296.8 K  
 D1 2.00000000 se  
 TDO 1

===== CHANNEL f1 =====  
 SFO1 300.1318008 MH  
 NUC1 1H  
 P1 14.00 us  
 SI 16384  
 SF 300.1300072 MH  
 WDW EM  
 SSB 0  
 LB 0.00 Hz  
 GB 0  
 PC 1.00

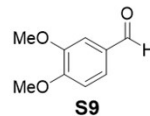

191104-314192-13C

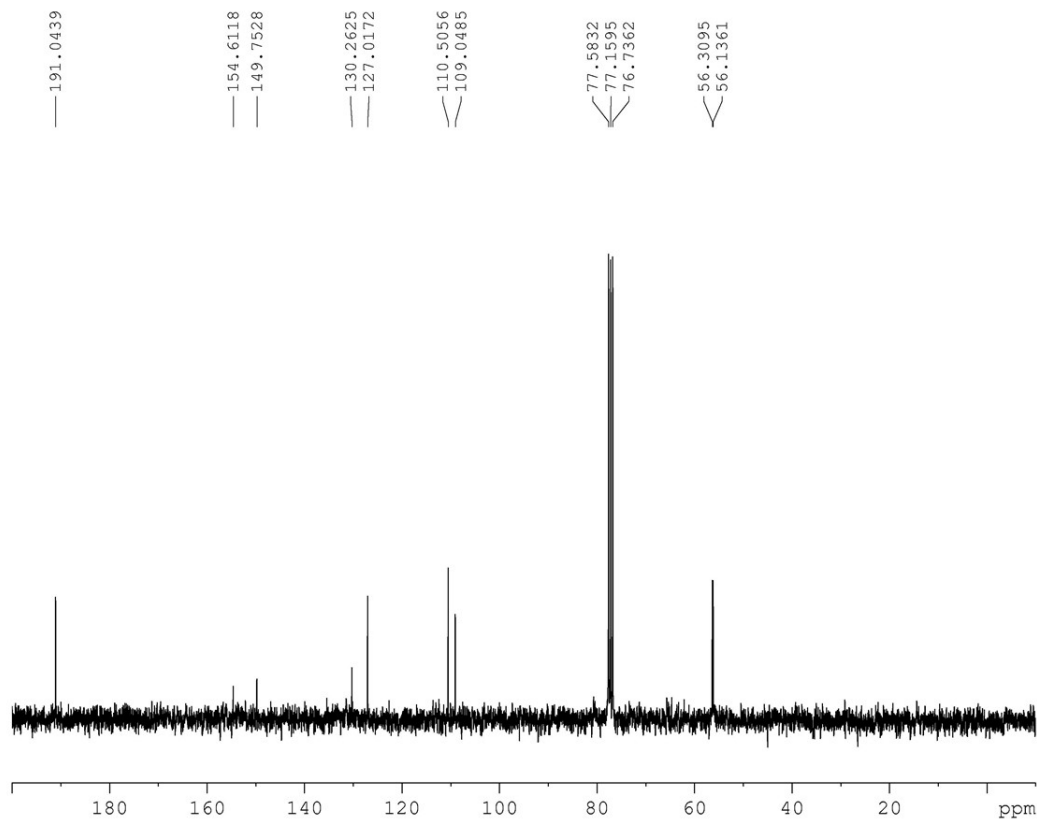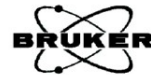

NAME 191104-314192  
 EXPNO 2  
 PROCNO 1  
 Date\_ 20191104  
 Time 16.10  
 INSTRUM spect  
 PROBHD 5 mm PABBO BB-  
 PULPROG zgpg30  
 TD 32768  
 SOLVENT CDCl3  
 NS 65  
 DS 9  
 SWH 18028.846 Hz  
 FIDRES 0.550197 Hz  
 AQ 0.9088159 sec  
 RG 219.17  
 DW 27.733 usec  
 DE 6.50 usec  
 TE 296.8 K  
 D1 2.00000000 sec  
 TDO 1

===== CHANNEL f1 =====  
 SFO1 75.4756726 MHz  
 NUC1 13C  
 P1 10.00 usec  
 SI 32768  
 SF 75.4677399 MHz  
 WDW EM  
 SSB 0  
 LB 2.00 Hz  
 GB 0  
 PC 1.00

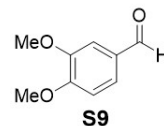

220303-06494

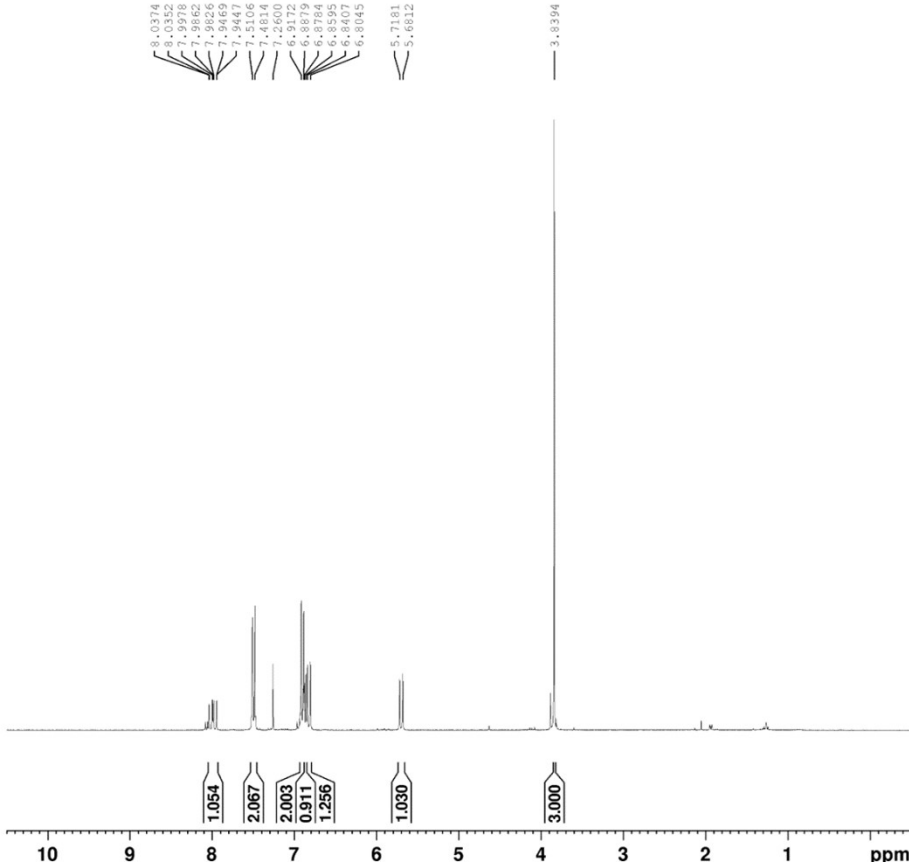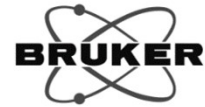

Current Data Parameters  
 NAME 220303-06494  
 EXPNO 1  
 PROCNO 1

F2 - Acquisition Parameters  
 Date\_ 20220303  
 Time 13.32  
 INSTRUM spect  
 PROBRD 5 mm PABBO BB-  
 PULPROG zg30  
 TD 32768  
 SOLVENT CDC13  
 NS 16  
 DS 0  
 SWH 6009.615 Hz  
 FIDRES 0.183399 Hz  
 AQ 2.7262976 sec  
 RG 219.17  
 DW 83.200 usec  
 DE 12.63 usec  
 TE 296.6 K  
 D1 2.00000000 sec  
 TD0 1

----- CHANNEL f1 -----  
 SFO1 300.1318008 MHz  
 NUC1 1H  
 P1 14.00 usec  
 PLW1 7.69999981 W

F2 - Processing parameters  
 SI 16384  
 SF 300.1300071 MHz  
 WDW EM  
 SSB 0  
 LB 0 Hz  
 GB 0  
 PC 1.00

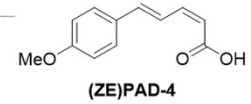

220303-06494-13C

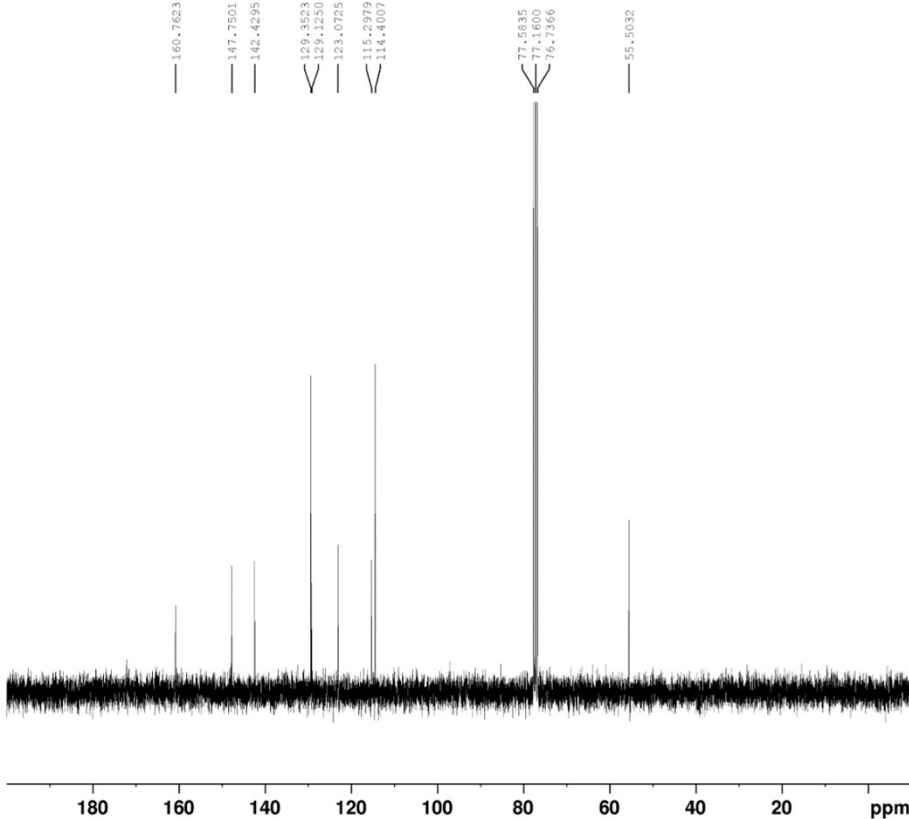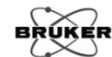

NAME 220303-06494  
 EXPNO 2  
 PROCNO 1  
 Date\_ 20220303  
 Time 13.37  
 INSTRUM spect  
 PROBRD 5 mm PABBO BB-  
 PULPROG zgpg30  
 TD 32768  
 SOLVENT CDC13  
 NS 128  
 DS 0  
 SWH 18028.846 Hz  
 FIDRES 0.550197 Hz  
 AQ 0.9087659 sec  
 RG 219.17  
 DW 27.733 usec  
 DE 6.50 usec  
 TE 297.0 K  
 D1 2.00000000 sec  
 D11 0.03000000 sec  
 TD0 1

----- CHANNEL f1 -----  
 SFO1 75.4756726 MHz  
 NUC1 13C  
 P1 10.00 usec  
 SI 32768  
 SF 75.4677388 MHz  
 WDW EM  
 SSB 0  
 LB 0.50 Hz  
 GB 0  
 PC 1.00

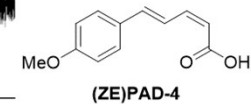

191008-EZ-CNA5

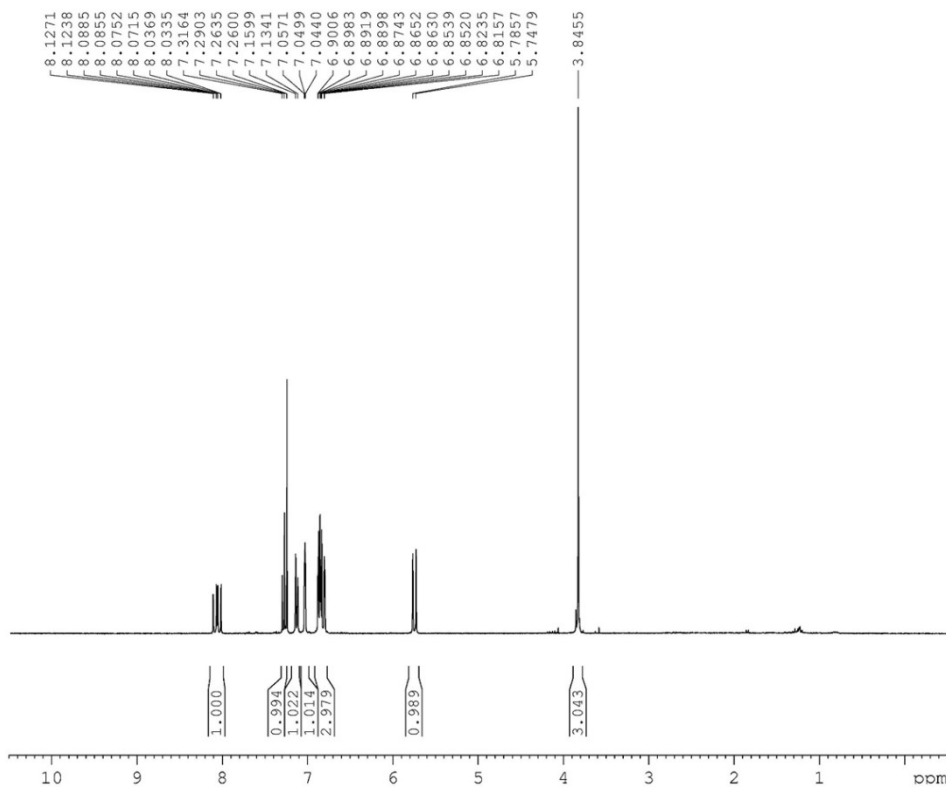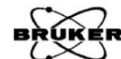

NAME 191008-EZ-CNA5  
 EXPNO 1910 1  
 PROCNO 1  
 Date\_ 20191008  
 Time 17.23  
 INSTRUM spect  
 PROBHD 5 mm PABBO BB-  
 PULPROG zg30  
 TD 32768  
 SOLVENT CDC13  
 NS 16  
 DS 0  
 SWH 6009.615 Hz  
 FIDRES 0.183399 Hz  
 AQ 2.7263477 se  
 RG 219.17  
 DW 83.200 us  
 DE 12.63 us  
 TE 296.9 K  
 D1 2.00000000 se  
 TD0 1

===== CHANNEL f1 =====  
 SFO1 300.1318008 MH  
 NUC1 1H  
 P1 14.00 us  
 SI 16384  
 SF 300.1300072 MH  
 WDW EM  
 SSB 0  
 LB 0.00 Hz  
 GB 0  
 PC 1.00

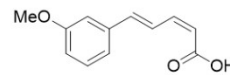

(Z)-PAD-5

13C of EZPAD5

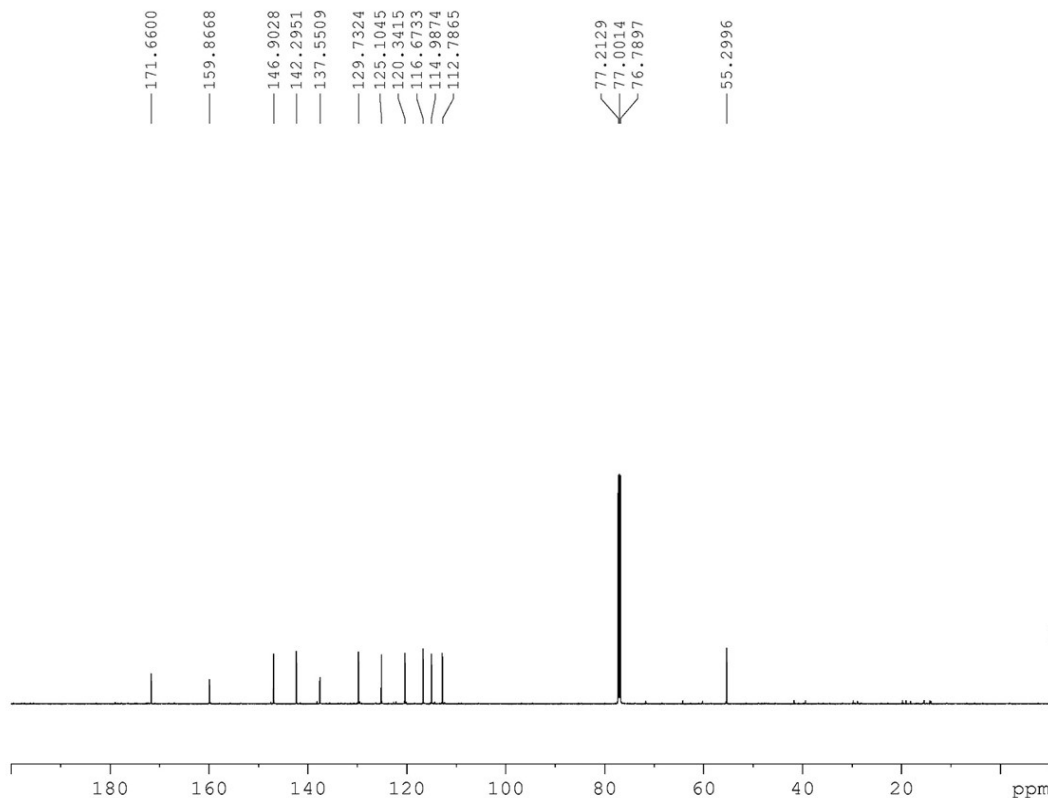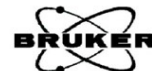

NAME 200706  
 EXPNO 16  
 PROCNO 1  
 Date\_ 20200709  
 Time 6.06  
 INSTRUM spect  
 PROBHD 5 mm PATBO BB-  
 PULPROG zgpg30  
 TD 65536  
 SOLVENT CDCl3  
 NS 3000  
 DS 0  
 SWH 36057.691 Hz  
 FIDRES 0.550197 Hz  
 AQ 0.9088159 sec  
 RG 2050  
 DW 13.867 usec  
 DE 6.50 usec  
 TE 301.6 K  
 D1 2.00000000 sec  
 D11 0.03000000 sec  
 TD0 1

===== CHANNEL f1 =====  
 SFO1 150.9287115 MHz  
 NUC1 13C  
 P1 12.00 usec  
 SI 32768  
 SF 150.9128706 MHz  
 WDW EM  
 SSB 0  
 LB 2.00 Hz  
 GB 0  
 PC 1.00

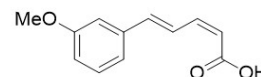

(Z)-PAD-5

190814-314183

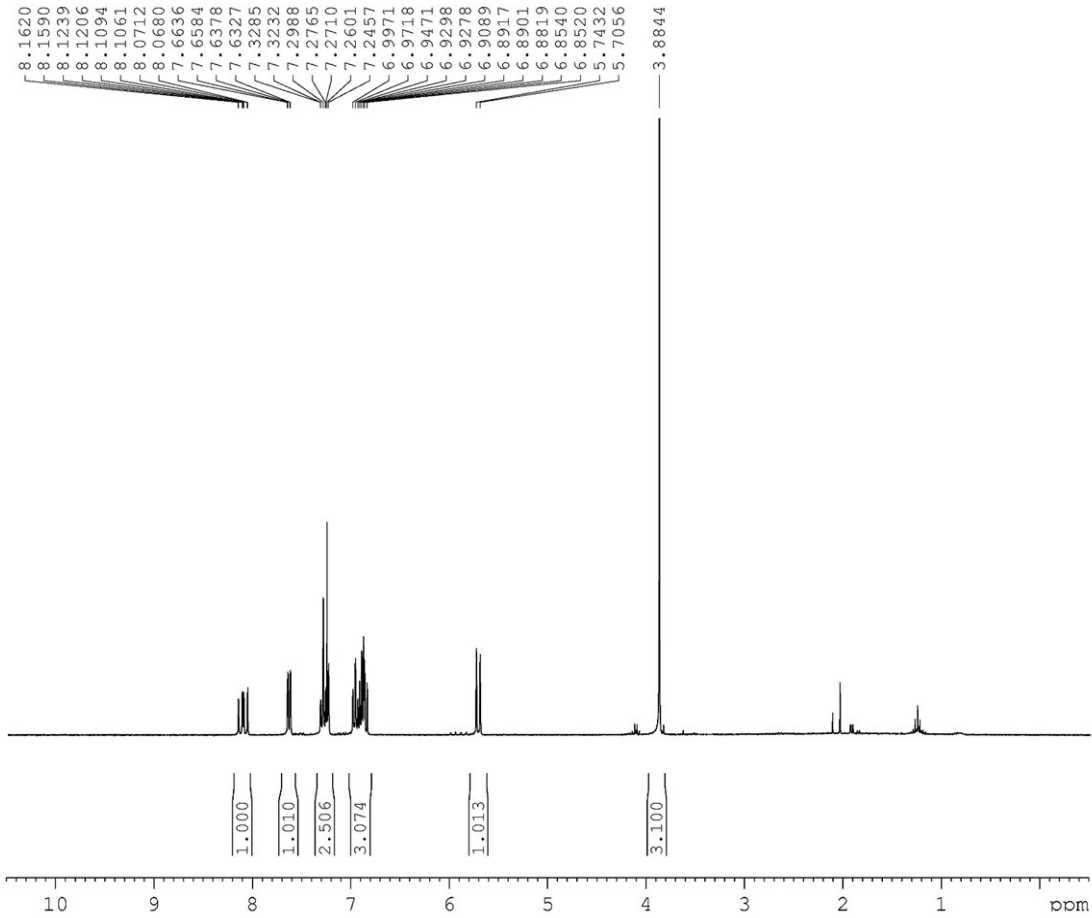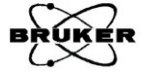

NAME 190814-314183  
EXPNO 1  
PROCNO NAME 190 1  
Date\_ 20190814  
Time 20.05  
INSTRUM spect  
PROBHD 5 mm PABBO BB-  
PULPROG zg30  
TD 32768  
SOLVENT CDCl3  
NS 16  
DS 0  
SWH 6009.615 Hz  
FIDRES 0.183399 Hz  
AQ 2.7263477 sec  
RG 219.17  
DW 83.200 usec  
DE 12.63 usec  
TE 296.9 K  
D1 2.0000000 sec  
TD0 1

===== CHANNEL f1 =====  
SFO1 300.1318008 MHz  
NUC1 1H  
P1 14.00 usec  
SI 16384  
SF 300.1300071 MHz  
WDW EM  
SSB 0  
LB 0.00 Hz  
GB 0  
PC 1.00

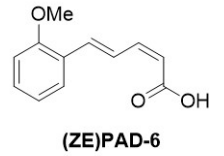

191104-ZECNA-6-13C

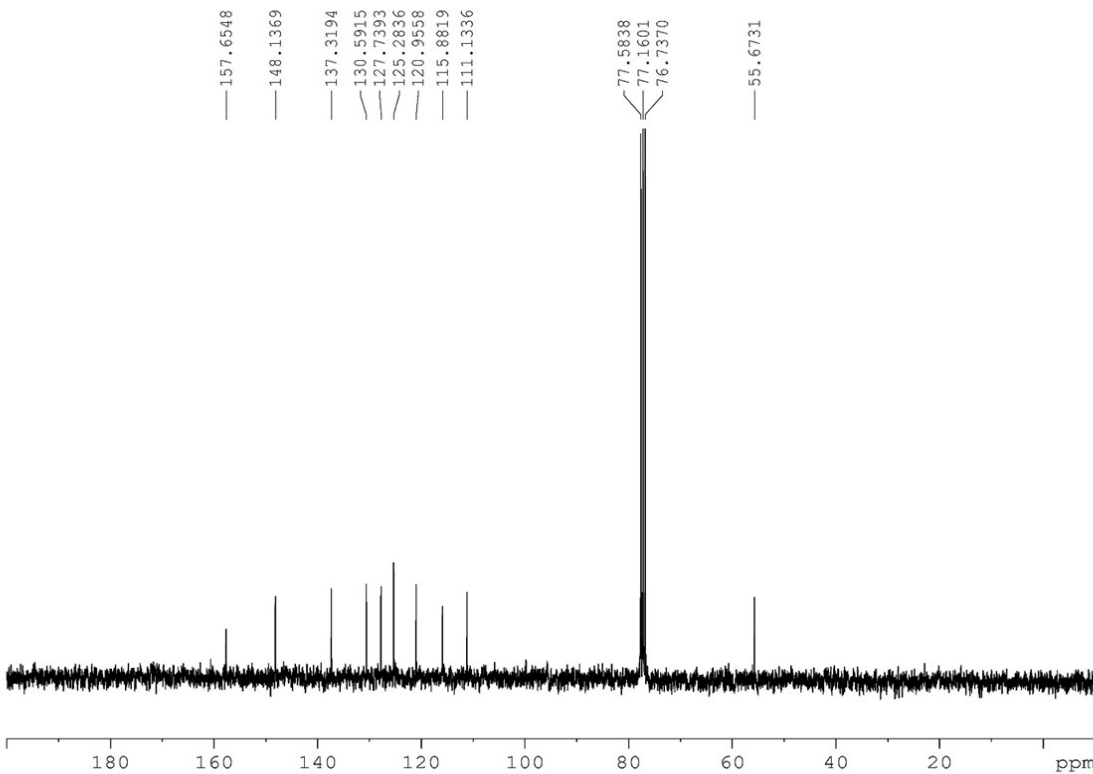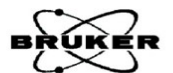

NAME 191104-ZECNA-6  
EXPNO 2  
PROCNO 1  
Date\_ 20191104  
Time 15.51  
INSTRUM spect  
PROBHD 5 mm PABBO BB-  
PULPROG zgpg30  
TD 32768  
SOLVENT CDCl3  
NS 129  
DS 0  
SWH 18028.846 Hz  
FIDRES 0.550197 Hz  
AQ 0.9088159 sec  
RG 219.17  
DW 27.733 usec  
DE 6.50 usec  
TE 297.1 K  
D1 2.0000000 sec  
TD0 1

===== CHANNEL f1 =====  
SFO1 75.4756726 MHz  
NUC1 13C  
P1 10.00 usec  
SI 32768  
SF 75.4677389 MHz  
WDW EM  
SSB 0  
LB 2.00 Hz  
GB 0  
PC 1.00

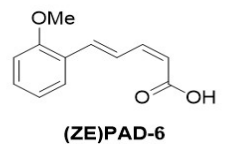

190905-314184-fullspec-13C

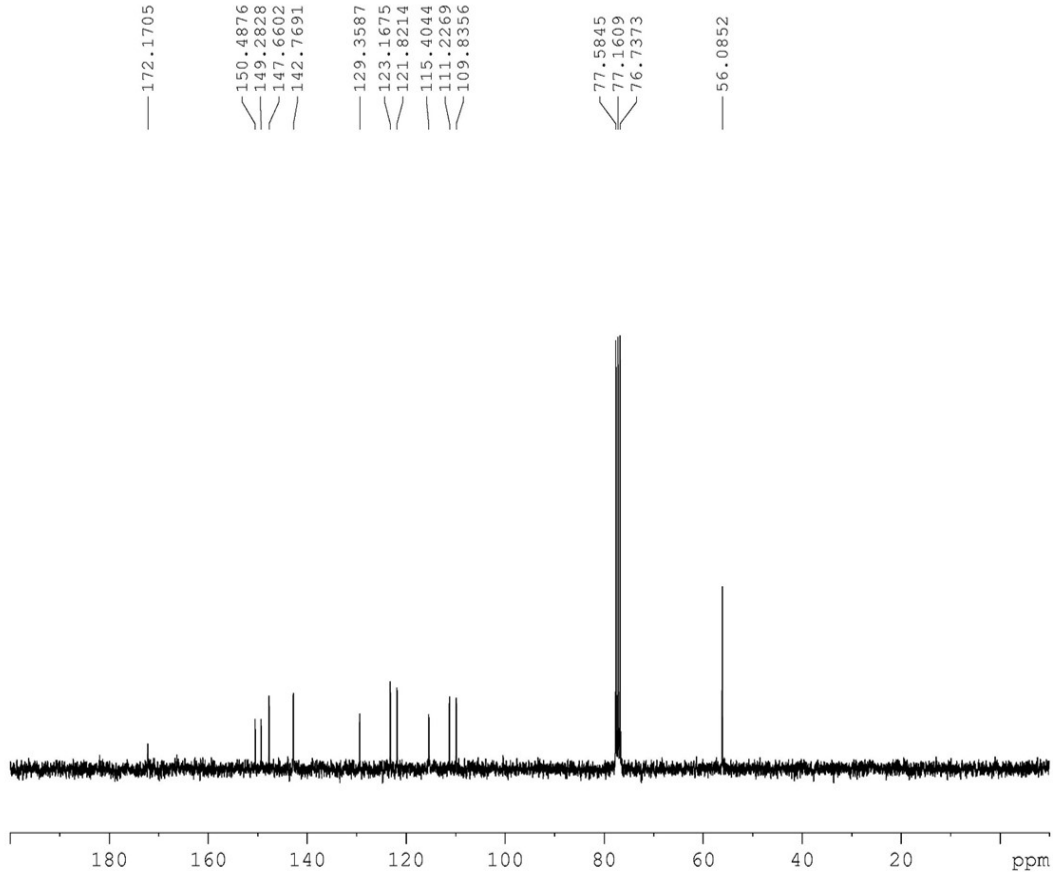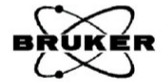

NAME 190905-314184-fullspe  
EXPNO 2  
PROCNO 1  
Date\_ 20190905  
Time 22.07  
INSTRUM spect  
PROBHD 5 mm PABBO BB-  
PULPROG zgpg30  
TD 32768  
SOLVENT CDCl3  
NS 161  
DS 0  
SWH 18028.846 Hz  
FIDRES 0.550197 Hz  
AQ 0.9088159 sec  
RG 219.17  
DW 27.733 usec  
DE 6.50 usec  
TE 296.8 K  
D1 2.00000000 sec  
TD0 1

===== CHANNEL f1 =====  
SFO1 75.4756726 MHz  
NUC1 13C  
P1 10.00 usec  
SI 32768  
SF 75.4677398 MHz  
WDW EM  
SSB 0  
LB 2.00 Hz  
GB 0  
PC 1.00

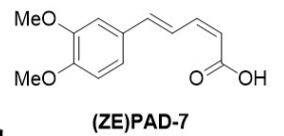

191125-EECNA4-DMSO

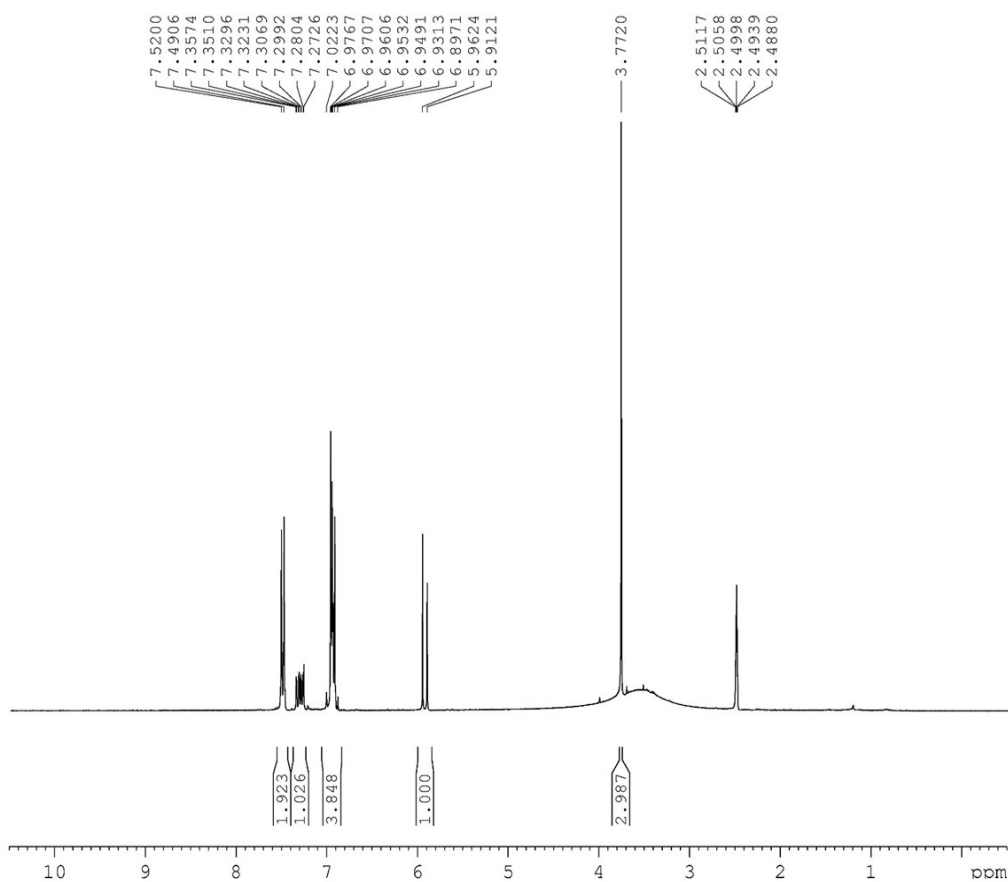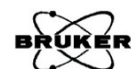

```

NAME      191125-EECNA4-DMSO
EXPNO    1
PROCNO   1
Date_    20191125
Time     19.27
INSTRUM spect
PROBHD   5 mm PABBO BB-
PULPROG zg30
TD       32768
SOLVENT  DMSO
NS       16
DS       0
SWH      6009.615 Hz
FIDRES   0.183399 Hz
AQ       2.7263477 sec
RG       171.09
DW       83.200 usec
DE       12.63 usec
TE       296.9 K
D1       2.00000000 sec
TD0      1
    
```

```

===== CHANNEL f1 =====
SFO1    300.1318008 MH:
NUC1     1H
P1      14.00 usec
SI      16384
SF      300.1300024 MH:
WDW     EM
SSB     0
LB      0.00 Hz
GB      0
PC      1.00
    
```

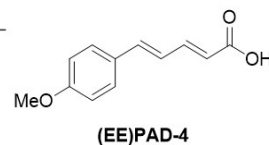

191125-EECNA4-DMSO-13C

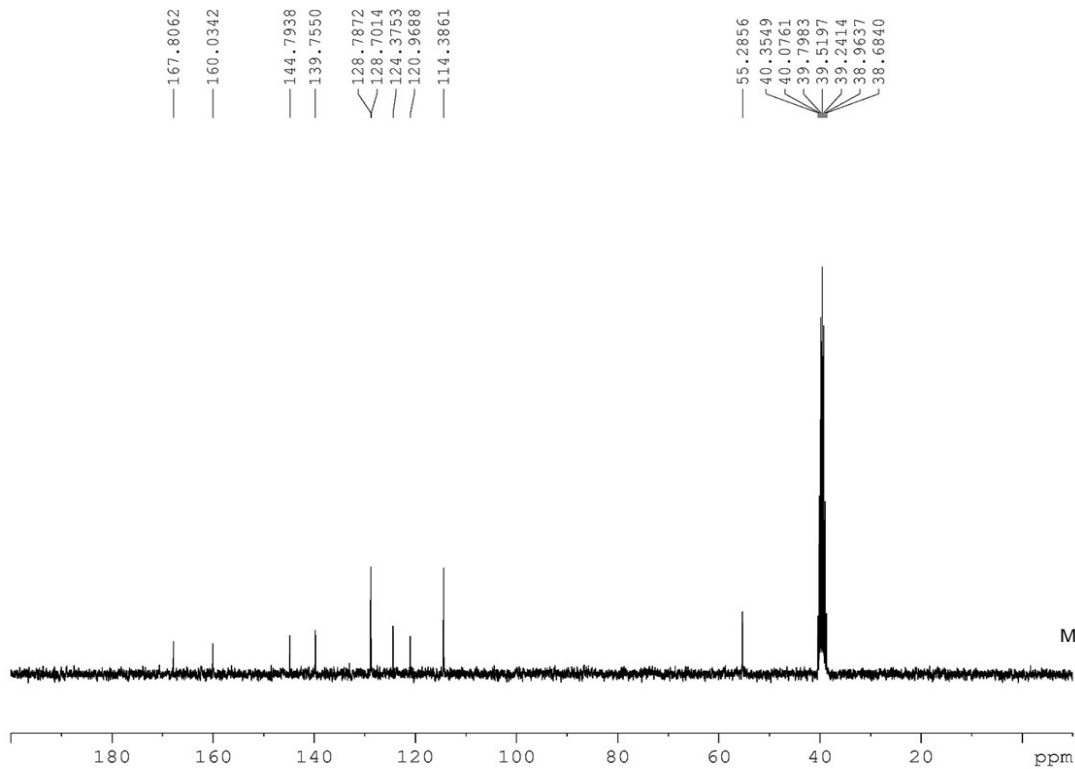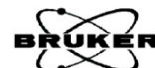

```

NAME      191125-EECNA4-DMSO
EXPNO    2
PROCNO   1
Date_    20191125
Time     19.29
INSTRUM spect
PROBHD   5 mm PABBO BB-
PULPROG zgpg30
TD       32768
SOLVENT  DMSO
NS       64
DS       0
SWH      18028.846 Hz
FIDRES   0.550197 Hz
AQ       0.9088159 sec
RG       219.17
DW       27.733 usec
DE       6.50 usec
TE       296.9 K
D1       2.00000000 sec
D11      0.03000000 sec
TD0      1
    
```

```

===== CHANNEL f1 =====
SFO1    75.4756726 MHz
NUC1     13C
P1      10.00 usec
SI      32768
SF      75.4677797 MHz
WDW     EM
SSB     0
LB      2.00 Hz
GB      0
PC      1.00
    
```

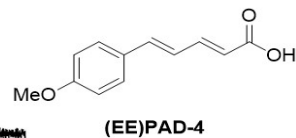

191008-EE-CNA5

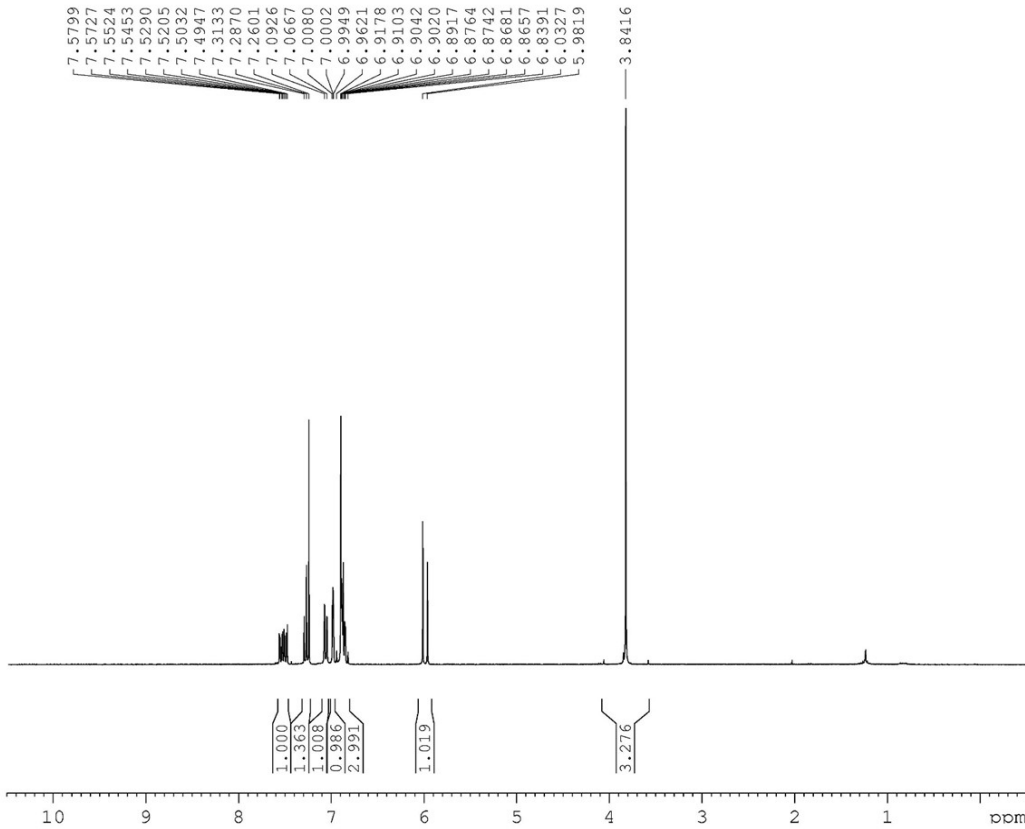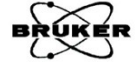

```

NAME      191008-EE-CNA5
EXPNO     1
PROCNO    1
Date_     20191008
Time      16.58
INSTRUM   spect
PROBHD    5 mm PABBO BB-
PULPROG   zg30
TD         32768
SOLVENT   CDCl3
NS         16
DS         0
SWH        6009.615 Hz
FIDRES     0.183399 Hz
AQ         2.7263477 sec
RG         219.17
DW         83.200 usec
DE         12.63 usec
TE         296.7 K
D1         2.00000000 sec
TD0        1

===== CHANNEL f1 =====
SFO1      300.1318008 MHz
NUC1       1H
P1         14.00 usec
SI         16384
SF         300.1300071 MHz
WDW        EM
SSB        0
LB         0.00 Hz
GB         0
PC         1.00
    
```

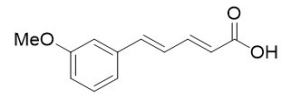

(EE)PAD-5

13C of EEPAD5

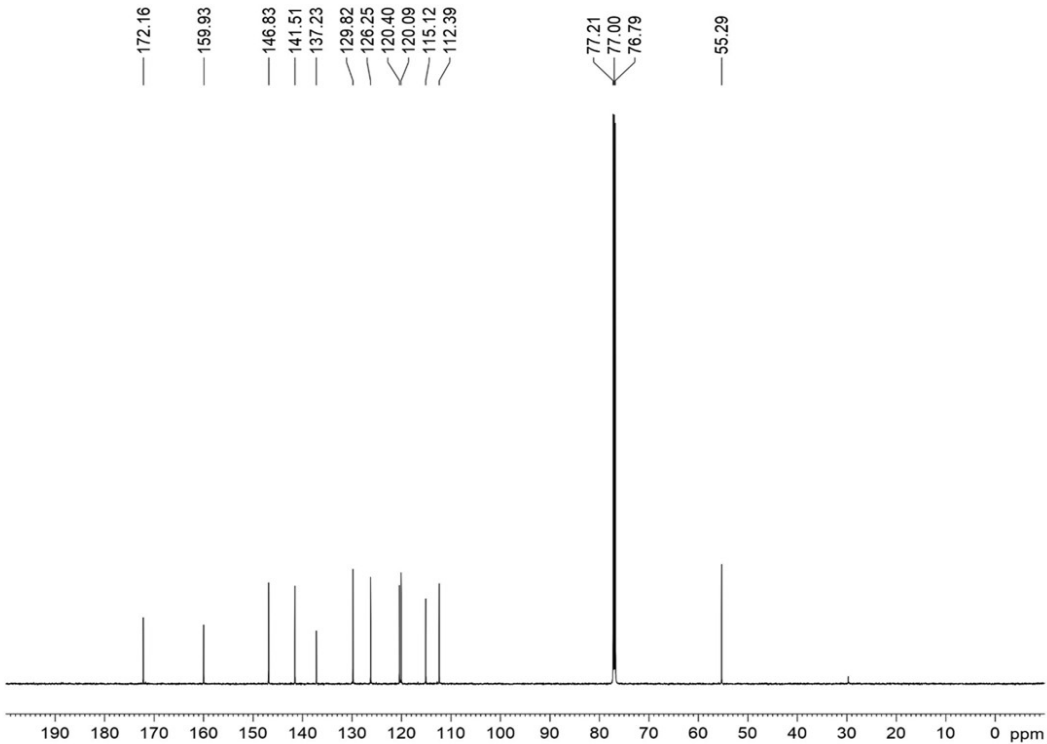

```

Current Data Parameters
NAME      2020060056
EXPNO     116
PROCNO    1

F2 - Acquisition Parameters
Date_     20200710
Time      6.03
INSTRUM   spect
PROBHD    5 mm PATBO BB-
PULPROG   zgpg30
TD         65536
SOLVENT   CDCl3
NS         2400
DS         0
SWH        36057.691 Hz
FIDRES     0.550197 Hz
AQ         0.9087659 sec
RG         2050
DW         13.867 usec
DE         6.50 usec
TE         302.2 K
D1         2.00000000 sec
D11        0.03000000 sec
TD0        1

===== CHANNEL f1 =====
SFO1      150.9287115 MHz
NUC1       13C
P1         12.00 usec
PLW1      40.20000076 W

===== CHANNEL f2 =====
SFO2      600.1724007 MHz
NUC2       1H
CPDPRG[2] waltz64
PCPD2     70.00 usec
PLW2      23.50000000 W
PLW12     1.08000004 W
PLW13     0.52875000 W

F2 - Processing parameters
SI         32768
SF         150.9128693 MHz
WDW        EM
SSB        0
LB         2.00 Hz
GB         0
PC         1.00
    
```

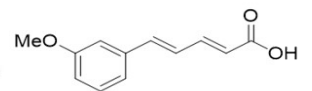

(EE)PAD-5



200818-EEPAD6-13C

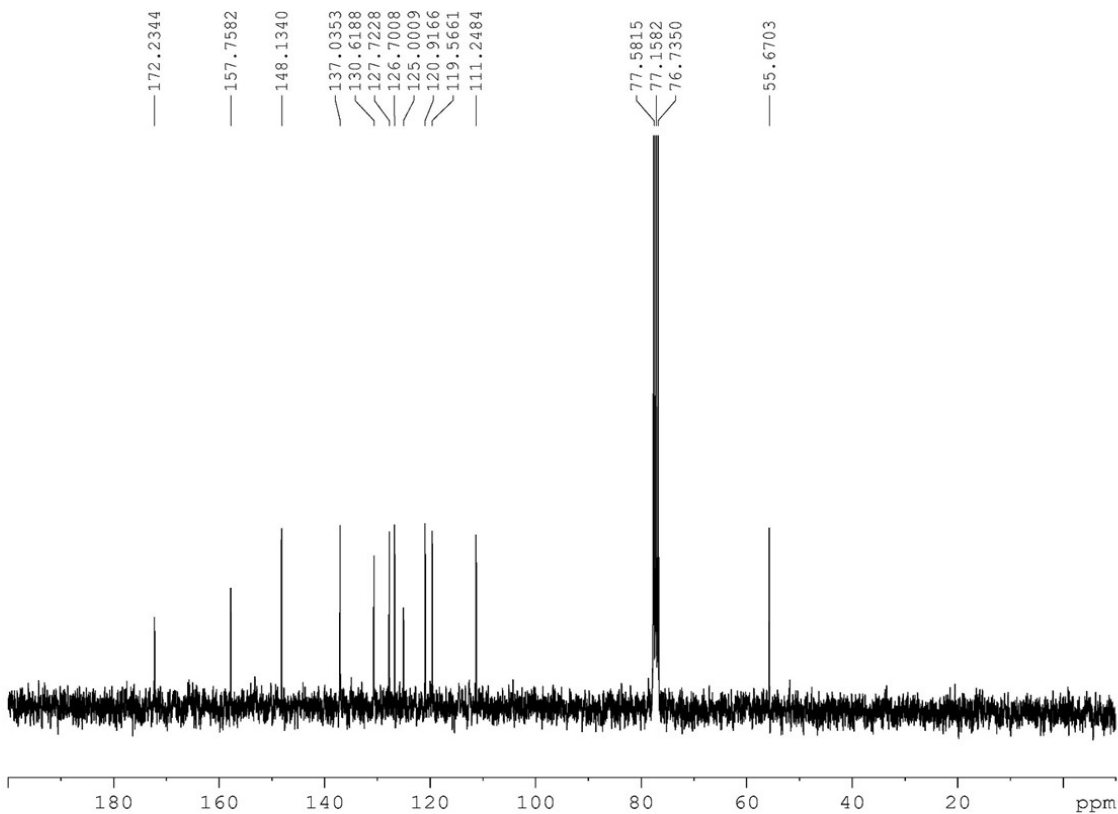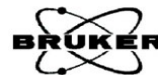

NAME 200818-EEPAD6  
EXPNO 2  
PROCNO 1  
Date\_ 20200818  
Time 15.31  
INSTRUM spect  
PROBHD 5 mm PABBO BB-  
PULPROG zgpg30  
TD 32768  
SOLVENT CDCl3  
NS 641  
DS 0  
SWH 18028.846 Hz  
FIDRES 0.550197 Hz  
AQ 0.9088159 sec  
RG 219.17  
DW 27.733 usec  
DE 6.50 usec  
TE 297.8 K  
D1 2.00000000 sec  
TD0 1

==== CHANNEL f1 =====  
SFO1 75.4756726 MHz  
NUC1 13C  
P1 10.00 usec  
SI 32768  
SF 75.4677382 MHz  
WDW EM  
SSB 0  
LB 2.00 Hz  
GB 0  
PC 1.00

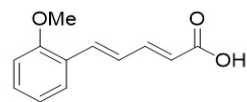

(EE)PAD-6

191104-EECNA-7

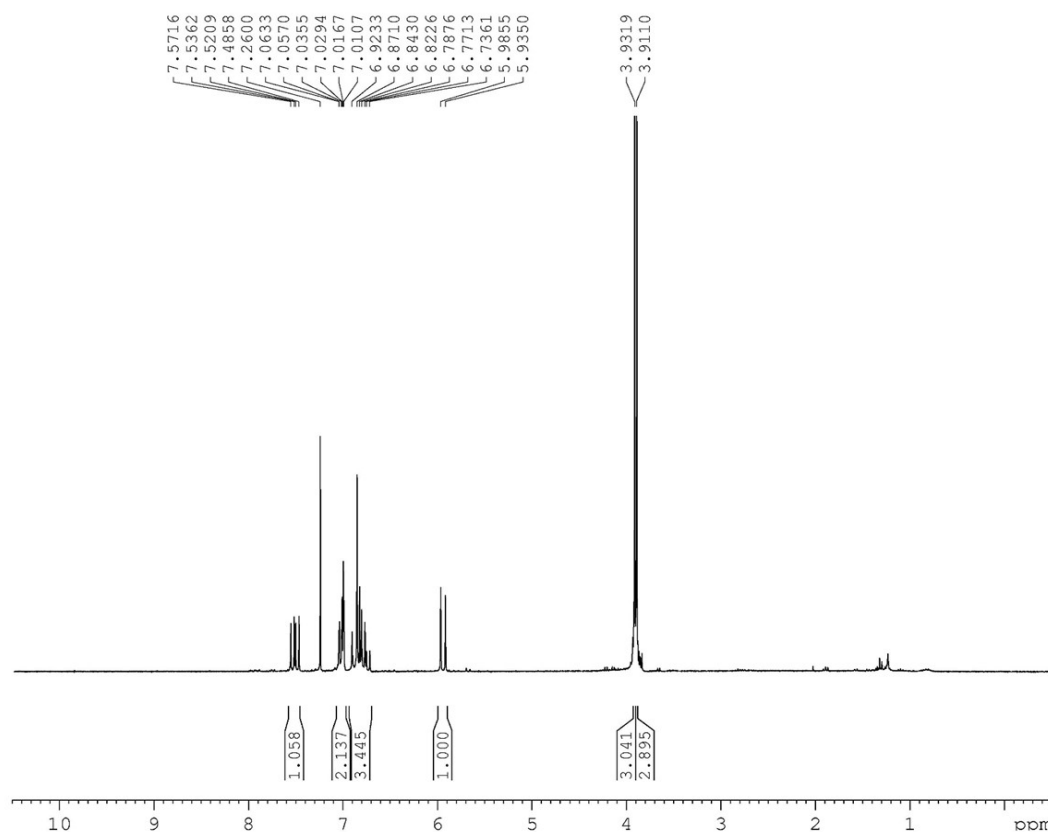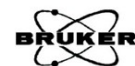

```

NAME      191104-EECNA-7
EXPNO    1
PROCNO   NAME 1911 1
Date_    20191104
Time     16.28
INSTRUM spect
PROBHD   5 mm PABBO BB-
PULPROG  zg30
TD       32768
SOLVENT  CDCl3
NS       16
DS       0
SWH      6009.615 Hz
FIDRES   0.183399 Hz
AQ       2.7263477 se
RG       219.17
DW       83.200 us
DE       12.63 us
TE       296.8 K
D1       2.00000000 se
TD0      1
    
```

```

===== CHANNEL f1 =====
SFO1    300.1318008 MH
NUC1     1H
P1      14.00 us
SI     16384
SF     300.1300072 MH
WDW     EM
SSB     0
LB      0.00 Hz
GB      0
PC      1.00
    
```

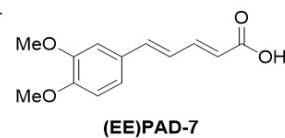

200818-EEPAD7-13C

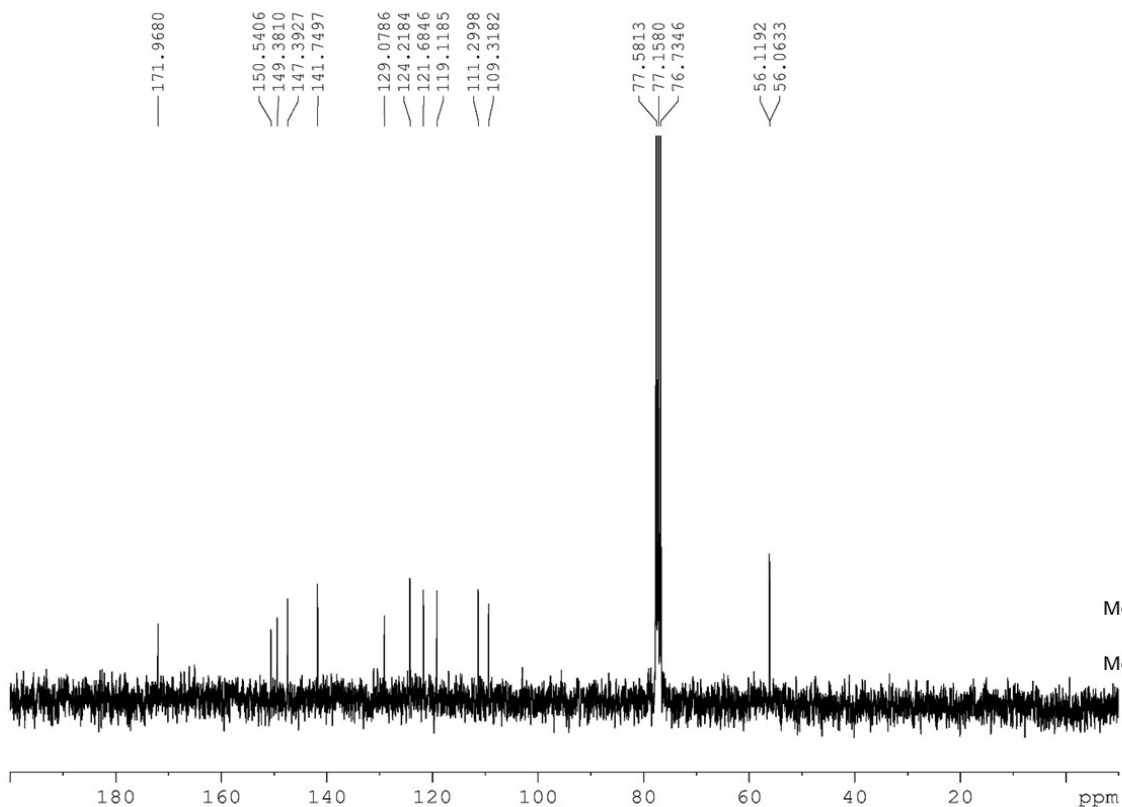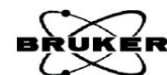

```

NAME      200818-EEPAD7
EXPNO    2
PROCNO   1
Date_    20200818
Time     15.43
INSTRUM spect
PROBHD   5 mm PABBO BB-
PULPROG  zgpg30
TD       32768
SOLVENT  CDCl3
NS       513
DS       0
SWH      18028.846 Hz
FIDRES   0.550197 Hz
AQ       0.9088159 sec
RG       219.17
DW       27.733 usec
DE       6.50 usec
TE       297.3 K
D1       2.00000000 sec
TD0      1
    
```

```

===== CHANNEL f1 =====
SFO1    75.4756726 MHz
NUC1     13C
P1     10.00 usec
SI     32768
SF     75.4677382 MHz
WDW     EM
SSB     0
LB      2.00 Hz
GB      0
PC      1.00
    
```

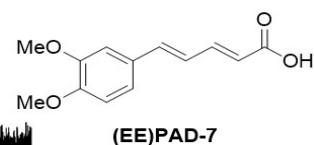

180104-306829 tube 23

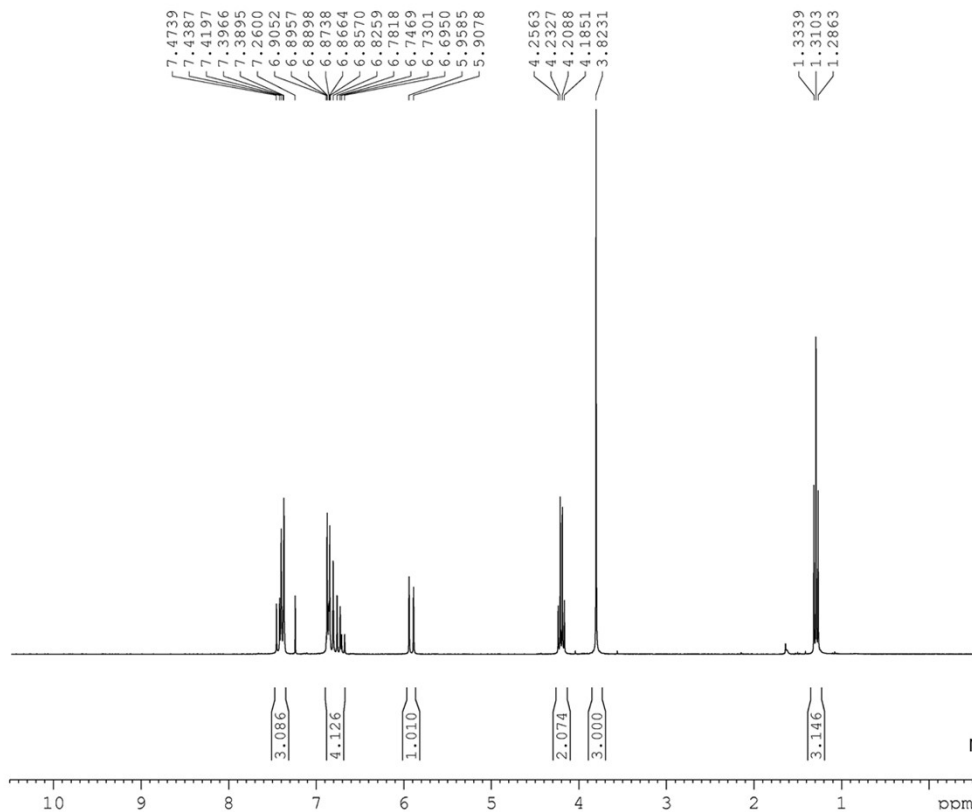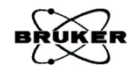

NAME 180104-306829  
 EXPNO 3  
 PROCNO NAME 180 1  
 Date\_ 20180104  
 Time 14.56  
 INSTRUM spect  
 PROBHD 5 mm PABBO BB-  
 PULPROG zg30  
 TD 32768  
 SOLVENT CDCl3  
 NS 8  
 DS 0  
 SWH 6009.615 Hz  
 FIDRES 0.183399 Hz  
 AQ 2.7263477 se  
 RG 219.17  
 DW 83.200 us  
 DE 12.53 us  
 TE 297.4 K  
 D1 2.00000000 se  
 TD0 1

===== CHANNEL f1 =====  
 SFO1 300.1318008 MH  
 NUC1 1H  
 P1 14.50 us  
 SI 16384  
 SF 300.1300072 MH  
 WDW EM  
 SSB 0  
 LB 0.00 Hz  
 GB 0  
 PC 1.00

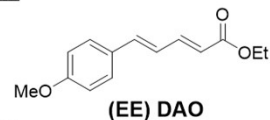

180104-306829 tube 23 13C

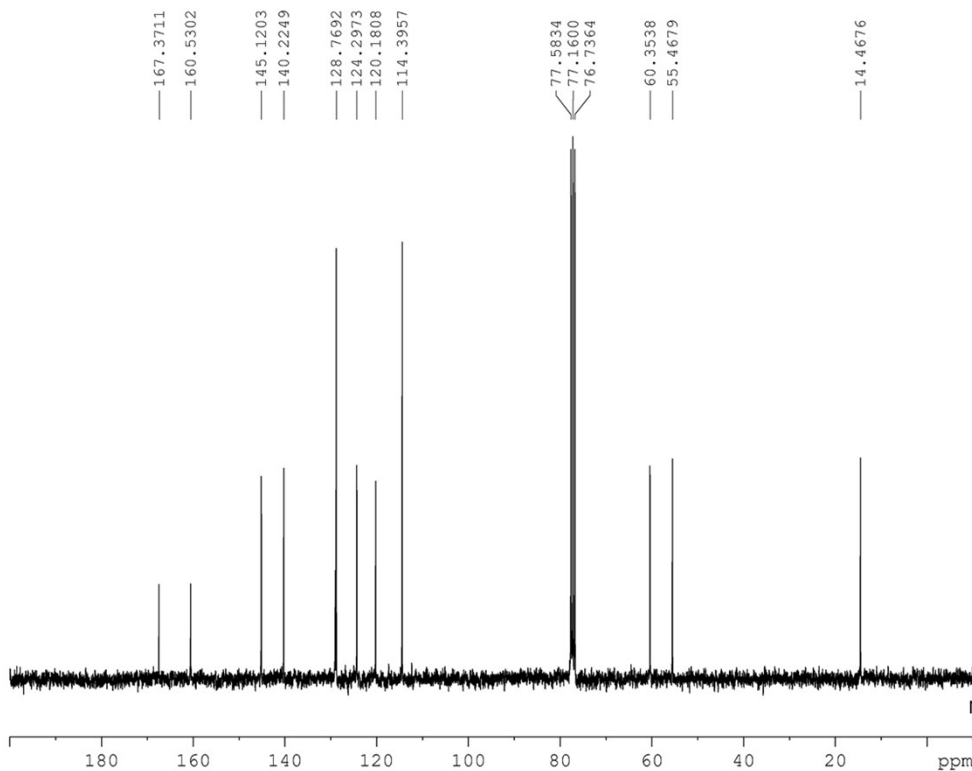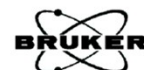

NAME 180104-306829  
 EXPNO 4  
 PROCNO 1  
 Date\_ 20180104  
 Time 14.57  
 INSTRUM spect  
 PROBHD 5 mm PABBO BB-  
 PULPROG zgpg30  
 TD 32768  
 SOLVENT CDCl3  
 NS 256  
 DS 0  
 SWH 18028.846 Hz  
 FIDRES 0.550197 Hz  
 AQ 0.9088159 sec  
 RG 219.17  
 DW 27.733 usec  
 DE 6.50 usec  
 TE 297.4 K  
 D1 2.00000000 sec  
 D11 0.03000000 sec  
 TD0 1

===== CHANNEL f1 =====  
 SFO1 75.4756726 MHz  
 NUC1 13C  
 P1 10.50 usec  
 SI 32768  
 SF 75.4677400 MHz  
 WDW EM  
 SSB 0  
 LB 2.00 Hz  
 GB 0  
 PC 1.00

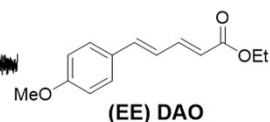

200730-PAD-8

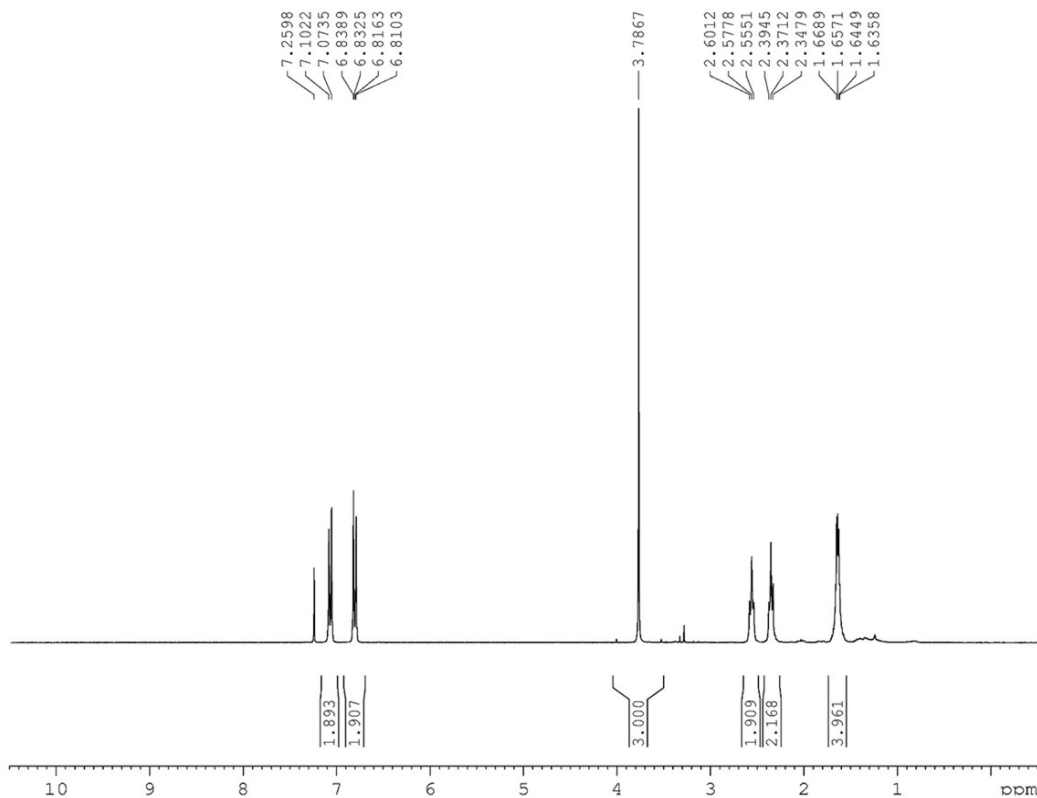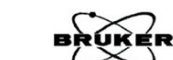

```

NAME      200730-PAD-8
EXPNO    20
PROCNO   1
Date_    20200730
Time     15.34
INSTRUM  spect
PROBHD   5 mm PABBO BB-
PULPROG  zg30
TD       32768
SOLVENT  CDCl3
NS       16
DS       0
SWH      6009.615 Hz
FIDRES   0.183399 Hz
AQ       2.7263477 se
RG       219.17
DW       83.200 us
DE       12.63 us
TE       298.5 K
D1       2.0000000 se
TD0      1
  
```

```

===== CHANNEL f1 =====
SFO1    300.1318008 MH
NUC1     1H
P1      14.00 us
SI      16384
SF      300.1300072 MH
WDW     EM
SSB     0
LB      0.00 Hz
GB      0
PC      1.00
  
```

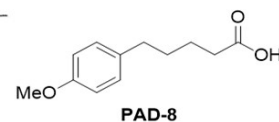

200730-PAD-8-13C

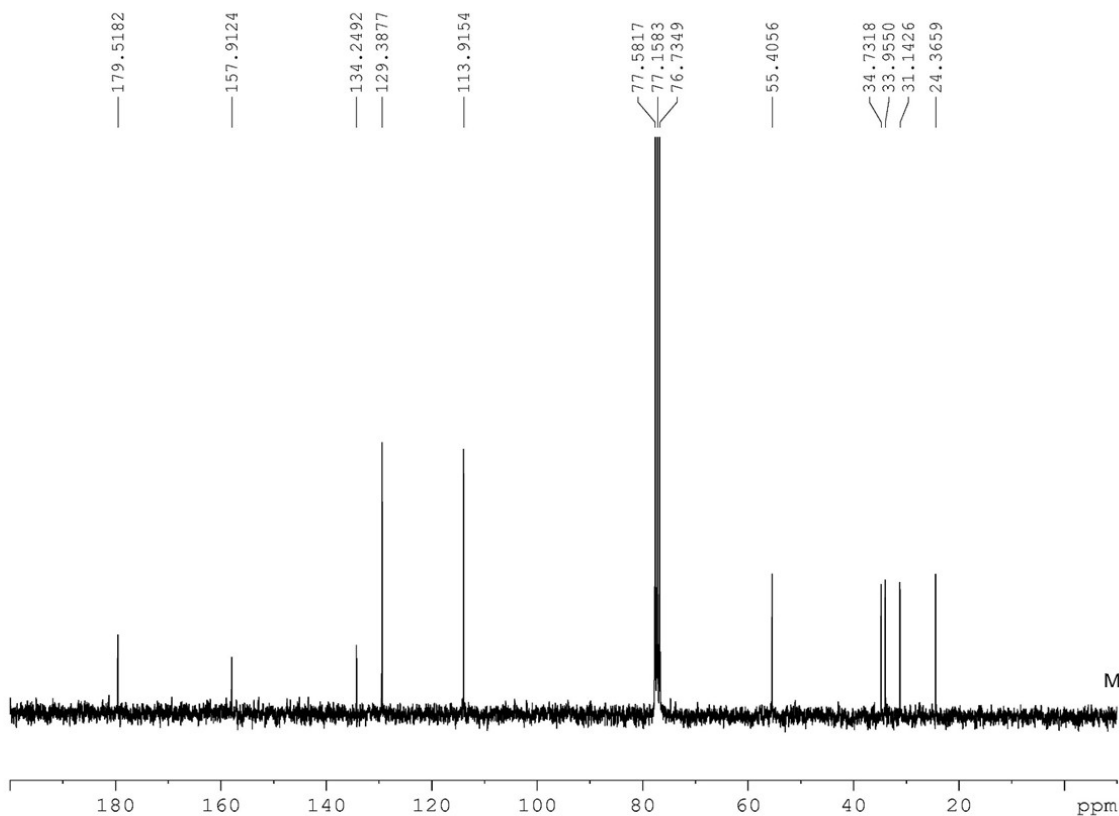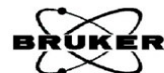

```

NAME      200730-PAD-8
EXPNO    3
PROCNO   1
Date_    20200730
Time     15.48
INSTRUM  spect
PROBHD   5 mm PABBO BB-
PULPROG  zgpg30
TD       32768
SOLVENT  CDCl3
NS       384
DS       0
SWH      18028.846 Hz
FIDRES   0.550197 Hz
AQ       0.9088159 sec
RG       219.17
DW       27.733 usec
DE       6.50 usec
TE       298.6 K
D1       2.0000000 sec
D11      0.03000000 sec
TD0      1
  
```

```

===== CHANNEL f1 =====
SFO1    75.4756726 MHz
NUC1    13C
P1      10.00 usec
SI      32768
SF      75.4677382 MHz
WDW     EM
SSB     0
LB      2.00 Hz
GB      0
PC      1.00
  
```

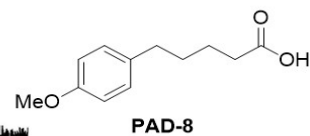

191119-318327

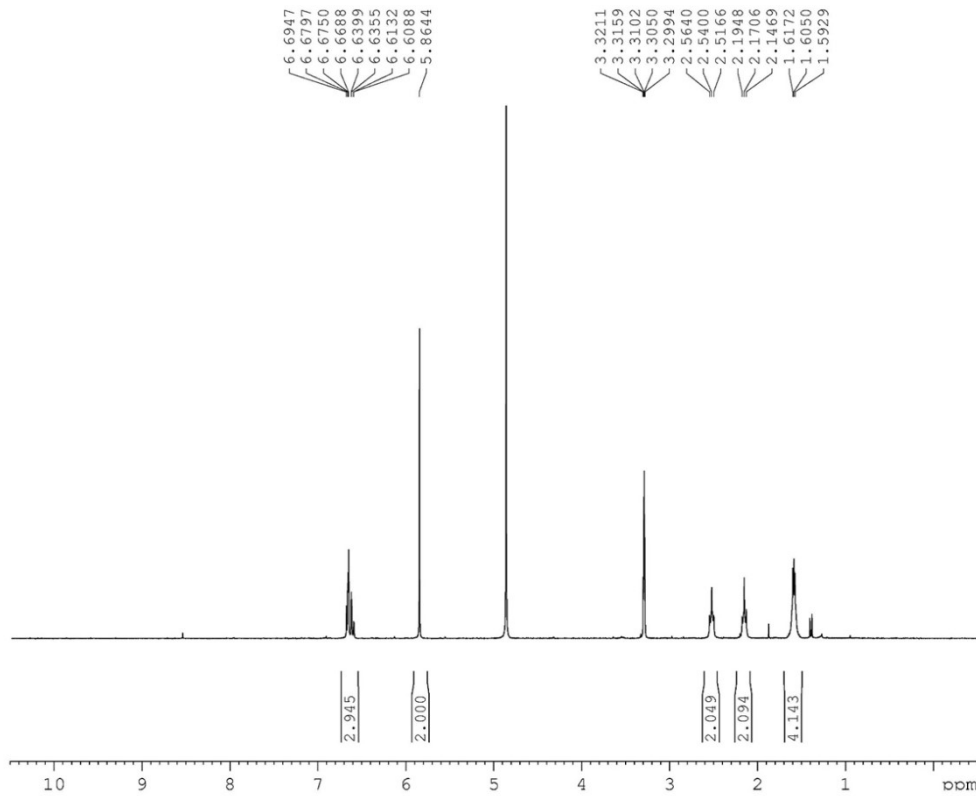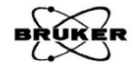

```

NAME 191119-318327
EXPNO 191 1
PROCNO NAME 191 1
Date_ 20191119
Time 14.16
INSTRUM spect
PROBHD 5 mm PABBO BB-
PULPROG zg30
TD 32768
SOLVENT MeOD
NS 16
DS 0
SWH 6009.615 Hz
FIDRES 0.183399 Hz
AQ 2.7263477 se
RG 219.17
DW 83.200 us
DE 12.63 us
TE 296.7 K
D1 2.00000000 se
TD0 1
    
```

```

===== CHANNEL f1 =====
SFO1 300.1318008 MH
NUC1 1H
PI 14.00 us
SI 16384
SF 300.1300057 MH
WDW EM
SSB 0
LB 0.00 Hz
GB 0
PC 1.00
    
```

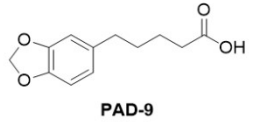

200730-PAD-9-13C

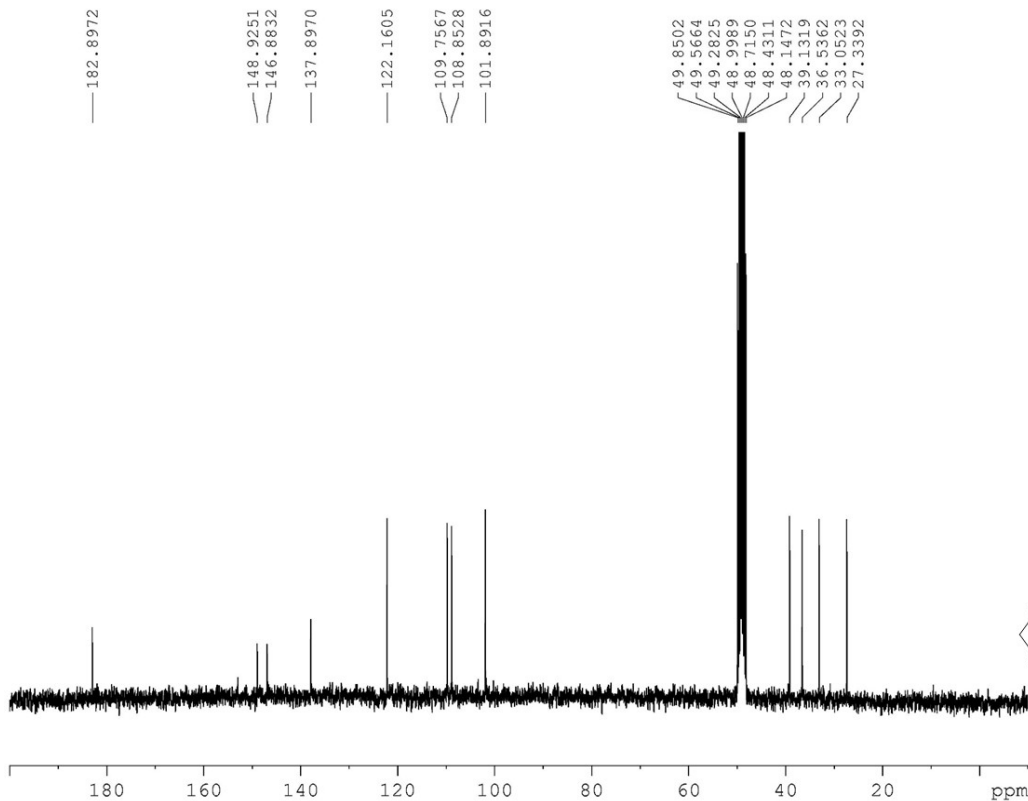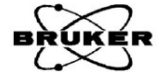

```

NAME 200730-PAD-9
EXPNO 2
PROCNO 1
Date_ 20200730
Time 16.35
INSTRUM spect
PROBHD 5 mm PABBO BB-
PULPROG zgpg30
TD 32768
SOLVENT MeOD
NS 897
DS 0
SWH 18028.846 Hz
FIDRES 0.550197 Hz
AQ 0.9088159 sec
RG 219.17
DW 27.733 usec
DE 6.50 usec
TE 298.2 K
D1 2.00000000 sec
TD0 1
    
```

```

===== CHANNEL f1 =====
SFO1 75.4756726 MHz
NUC1 13C
PI 10.00 usec
SI 32768
SF 75.4676427 MHz
WDW EM
SSB 0
LB 2.00 Hz
GB 0
PC 1.00
    
```

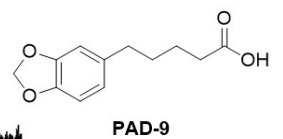

200818-PAD11-13C

200818-PAD12-13C

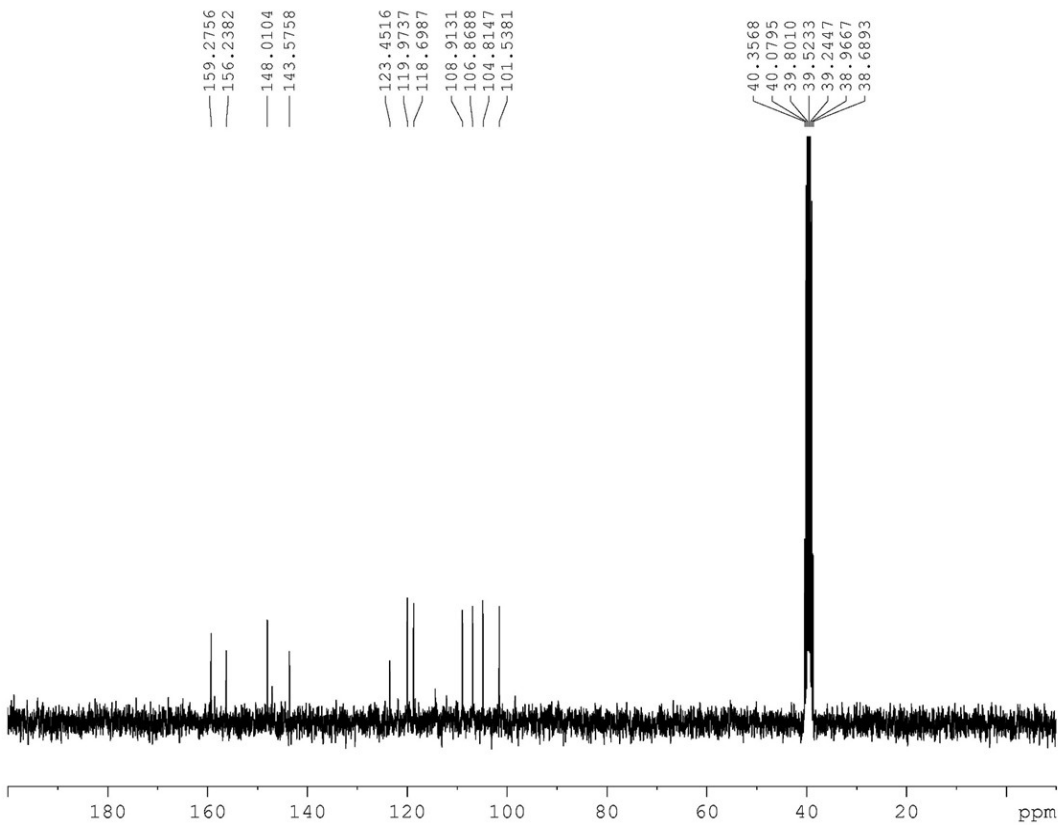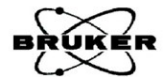

NAME 200818-PAD12  
EXPNO 3  
PROCNO 1  
Date\_ 20200818  
Time 18.18  
INSTRUM spect  
PROBHD 5 mm PABBO BB-  
PULPROG zgpg30  
TD 32768  
SOLVENT DMSO  
NS 65  
DS 0  
SWH 18028.846 Hz  
FIDRES 0.550197 Hz  
AQ 0.9088159 sec  
RG 219.17  
DW 27.733 usec  
DE 6.50 usec  
TE 297.5 K  
D1 2.00000000 sec  
TD0 1

===== CHANNEL f1 =====  
SFO1 75.4756726 MHz  
NUC1 13C  
PI 10.00 usec  
SI 32768  
SF 75.4677820 MHz  
WDW EM  
SSB 0  
LB 2.00 Hz  
GB 0  
PC 1.00

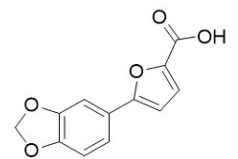

PAD-12

200514-PAD13-filtrated

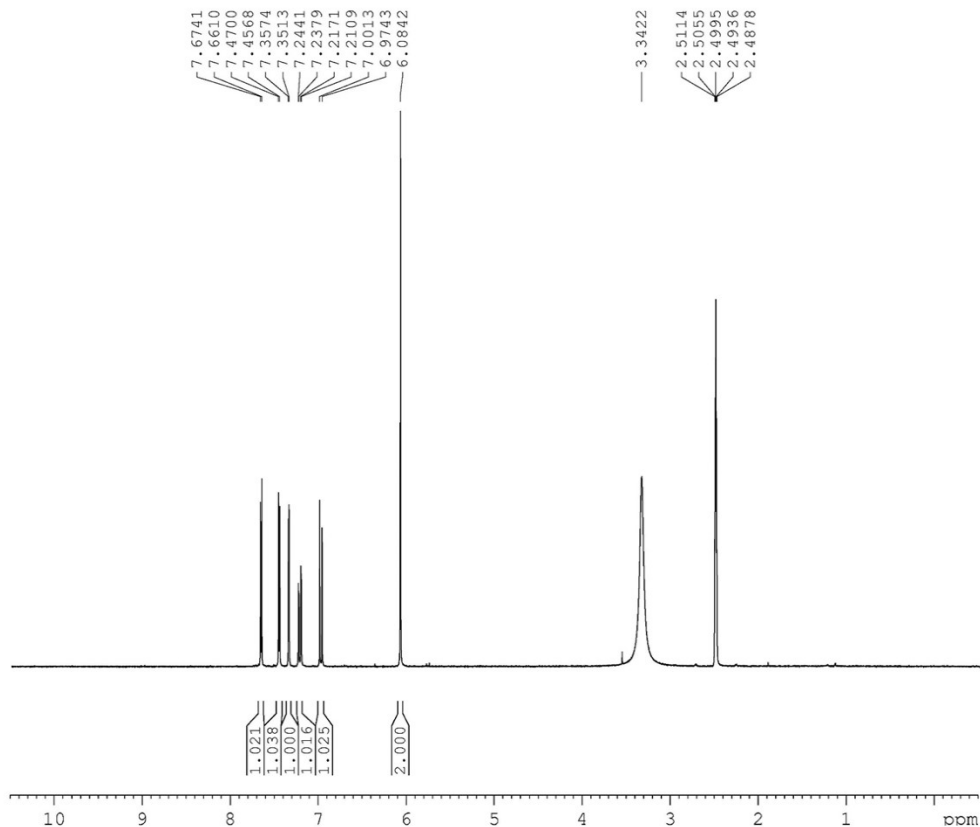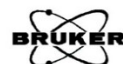

```

NAME      200514-PAD13-filt:
EXPNO    1
PROCNO   1
Date_    20200514
Time     21.11
INSTRUM  spect
PROBHD   5 mm PABBO BB-
PULPROG  zg30
TD       32768
SOLVENT  DMSO
NS       16
DS       0
SWH      6009.615 Hz
FIDRES   0.183399 Hz
AQ       2.7263477 se
RG       219.17
DW       83.200 us
DE       12.63 us
TE       295.3 K
D1       2.00000000 se
TD0      1
    
```

```

===== CHANNEL f1 =====
SFO1    300.1318008 MH:
NUC1     1H
PI      14.00 us
SI      16384
SF      300.1300024 MH:
WDW     EM
SSB     0
LB      0.00 Hz
GB      0
PC      1.00
    
```

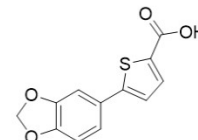

PAD-13

200515-PAD13-filtered-13C

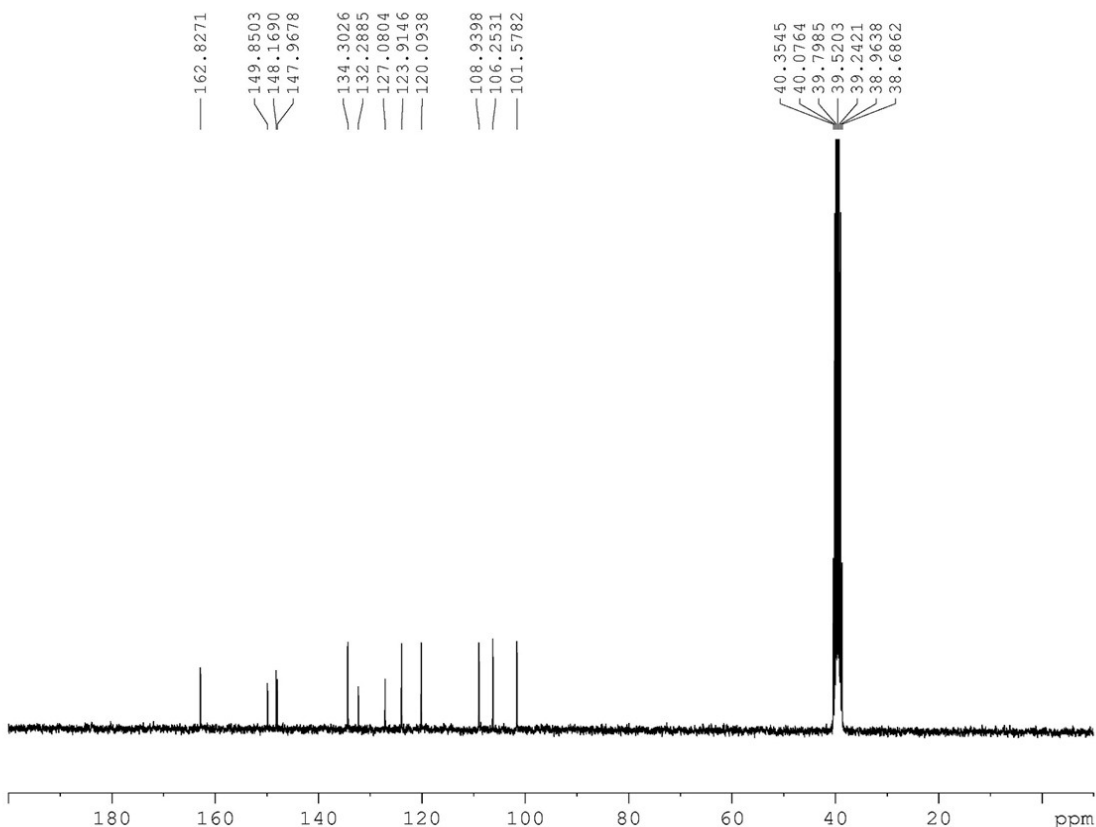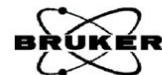

```

NAME      200515-PAD13-filtered
EXPNO    2
PROCNO   1
Date_    20200515
Time     16.55
INSTRUM  spect
PROBHD   5 mm PABBO BB-
PULPROG  zgpg30
TD       32768
SOLVENT  DMSO
NS       640
DS       0
SWH      18028.846 Hz
FIDRES   0.550197 Hz
AQ       0.9088159 sec
RG       219.17
DW       27.733 usec
DE       6.50 usec
TE       295.8 K
D1       2.00000000 sec
D11      0.03000000 sec
TD0      1
    
```

```

===== CHANNEL f1 =====
SFO1    75.4756726 MHz
NUC1     13C
PI      10.00 usec
SI      32768
SF      75.4677818 MHz
WDW     EM
SSB     0
LB      2.00 Hz
GB      0
PC      1.00
    
```

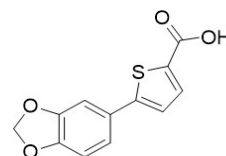

PAD-13

210615-05881

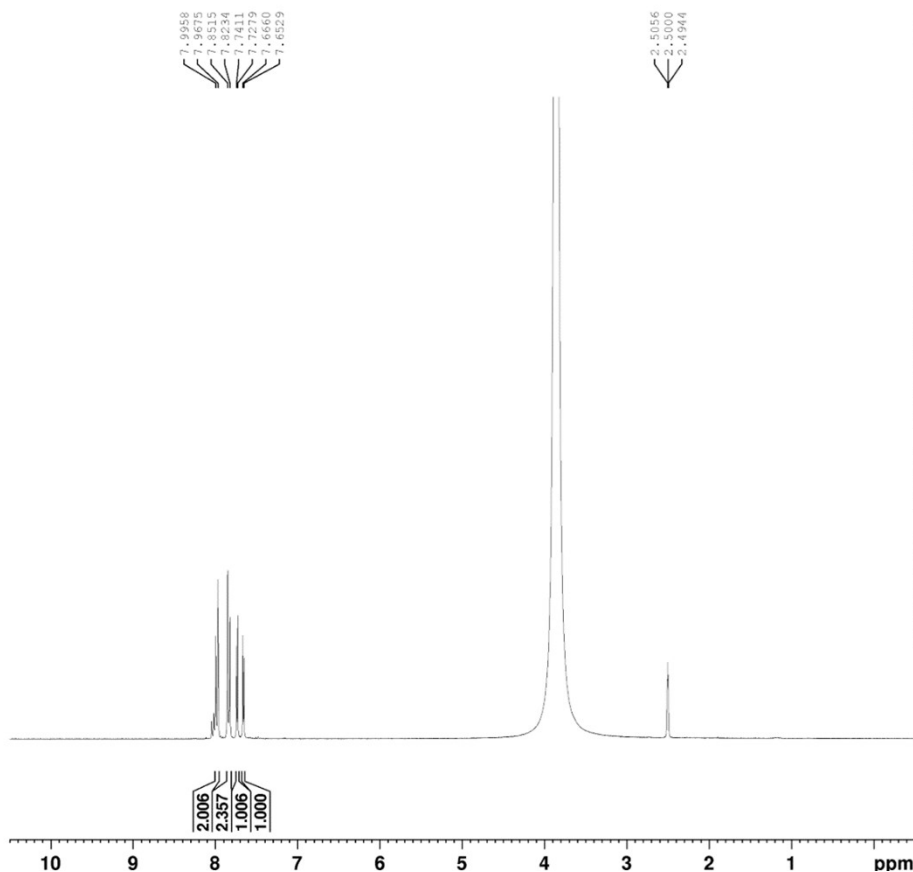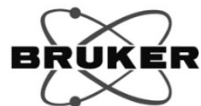

Current Data Parameters  
 NAME 210615-05881  
 EXPNO 1  
 PROCNO 1

F2 - Acquisition Parameters  
 Date\_ 20210615  
 Time 7.18  
 INSTRUM spect  
 PROBD 5 mm PABBO BB-  
 PULPROG zg30  
 TD 32768  
 SOLVENT DMSO  
 NS 16  
 DS 0  
 SWH 6009.615 Hz  
 FIDRES 0.183399 Hz  
 AQ 2.7262976 sec  
 RG 33.17  
 DW 83.200 usec  
 DE 12.63 usec  
 TE 308.1 K  
 D1 2.00000000 sec  
 TD0 1

----- CHANNEL f1 -----  
 SFO1 300.1318008 MHz  
 NUC1 1H  
 P1 14.00 usec  
 PLW1 7.69999981 W

F2 - Processing parameters  
 SI 16384  
 SF 300.1300025 MHz  
 WDW EM  
 SSB 0  
 LB 0 Hz  
 GB 0  
 PC 1.00

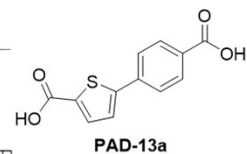

210615-05881-13C

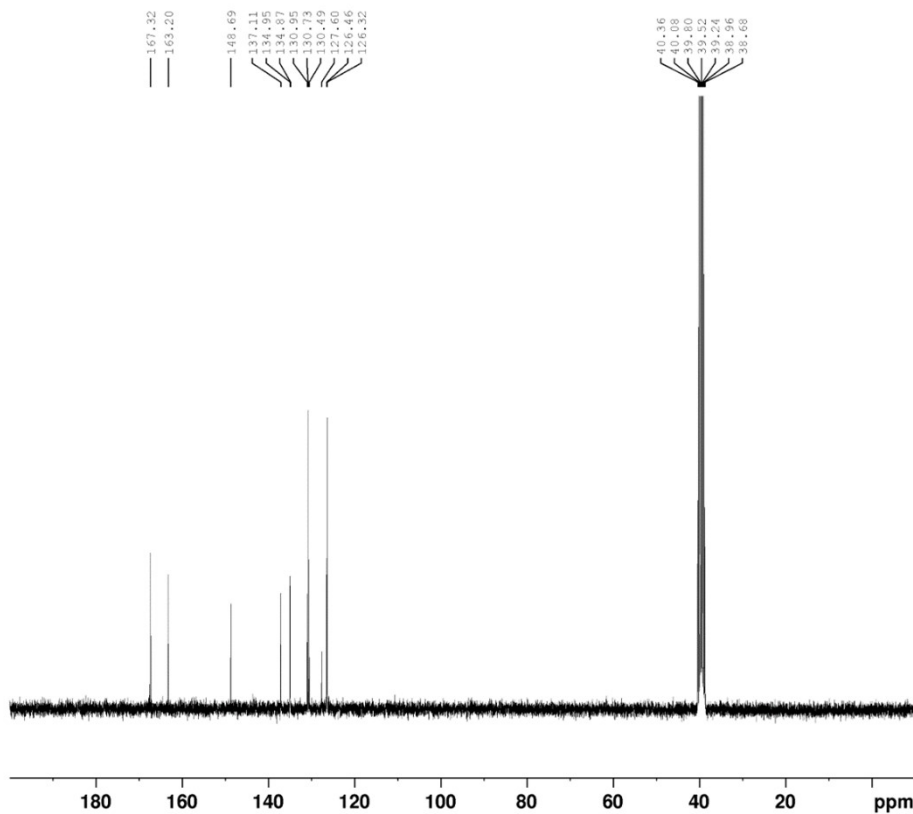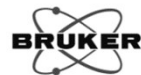

NAME 210615-05881  
 EXPNO 2  
 PROCNO 1  
 Date\_ 20210615  
 Time 8.20  
 INSTRUM spect  
 PROBD 5 mm PABBO BB-  
 PULPROG zgpg30  
 TD 32768  
 SOLVENT DMSO  
 NS 1024  
 DS 0  
 SWH 18028.846 Hz  
 FIDRES 0.550197 Hz  
 AQ 0.9087659 sec  
 RG 219.17  
 DW 27.733 usec  
 DE 6.50 usec  
 TE 308.3 K  
 D1 2.00000000 sec  
 D11 0.03000000 sec  
 TD0 1

----- CHANNEL f1 -----  
 SFO1 75.4756726 MHz  
 NUC1 13C  
 P1 10.00 usec  
 SI 32768  
 SF 75.4677515 MHz  
 WDW EM  
 SSB 0  
 LB 0.50 Hz  
 GB 0  
 PC 1.00

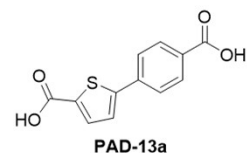



210722-06412

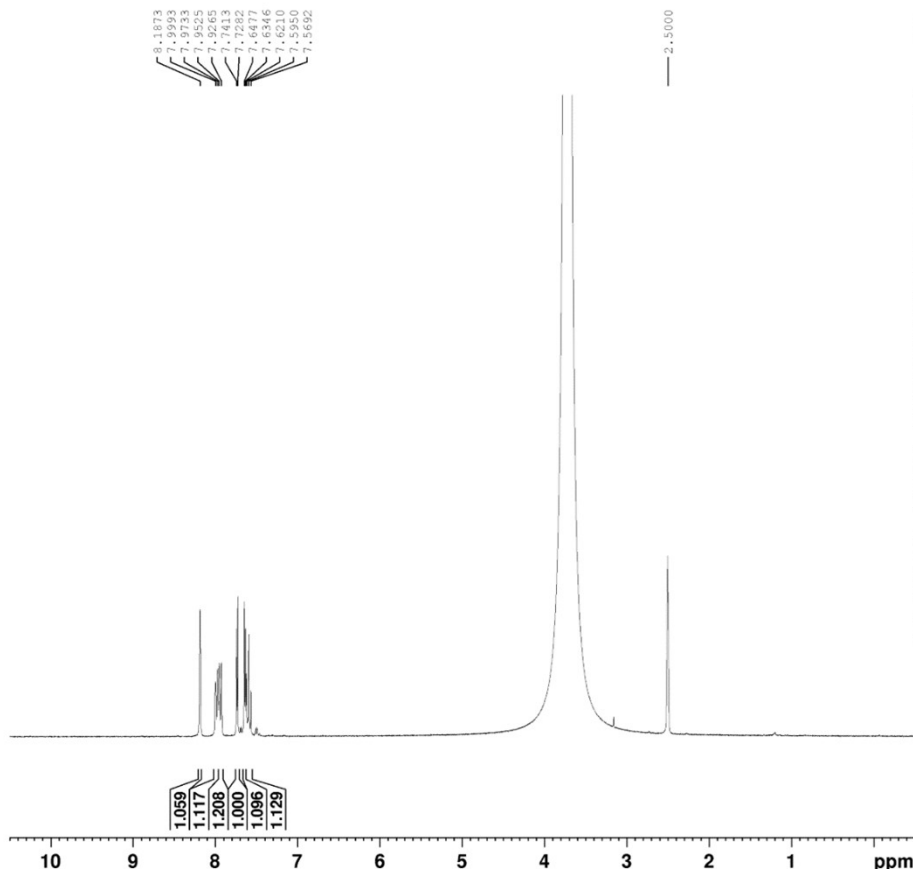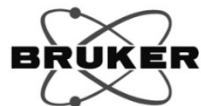

Current Data Parameters  
 NAME 210722-06412  
 EXPNO 1  
 PROCNO 1

F2 - Acquisition Parameters  
 Date\_ 20210722  
 Time 6.38  
 INSTRUM spect  
 PROBRD 5 mm PABBO BB-  
 PULPROG zg30  
 TD 32768  
 SOLVENT DMSO  
 NS 16  
 DS 0  
 SWH 6009.615 Hz  
 FIDRES 0.183399 Hz  
 AQ 2.7262976 sec  
 RG 96.06  
 DW 83.200 usec  
 DE 12.63 usec  
 TE 312.3 K  
 D1 2.00000000 sec  
 TD0 1

----- CHANNEL f1 -----  
 SF01 300.1318008 MHz  
 NUC1 1H  
 P1 14.00 usec  
 PLW1 7.69999981 W

F2 - Processing parameters  
 SI 16384  
 SF 300.1300024 MHz  
 WDW EM  
 SSB 0  
 LB 0 Hz  
 GB 0  
 PC 1.00

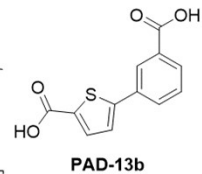

210722-06412-13C

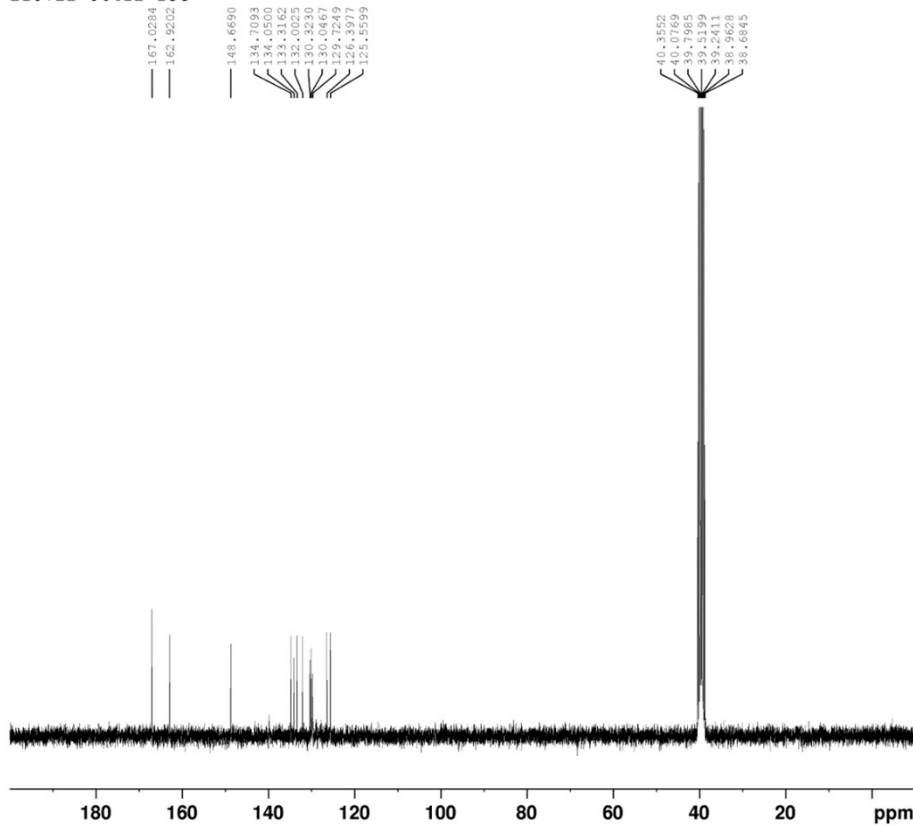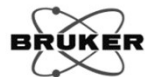

NAME 210722-06412  
 EXPNO 2  
 PROCNO 1  
 Date\_ 20210722  
 Time 7.33  
 INSTRUM spect  
 PROBRD 5 mm PABBO BB-  
 PULPROG zgpg30  
 TD 32768  
 SOLVENT DMSO  
 NS 1089  
 DS 0  
 SWH 18028.846 Hz  
 FIDRES 0.550197 Hz  
 AQ 0.9087659 sec  
 RG 219.17  
 DW 27.733 usec  
 DE 6.50 usec  
 TE 312.9 K  
 D1 2.00000000 sec  
 D11 0.03000000 sec  
 TD0 1

----- CHANNEL f1 -----  
 SF01 75.4756726 MHz  
 NUC1 13C  
 P1 10.00 usec  
 SI 32768  
 SF 75.4677680 MHz  
 WDW EM  
 SSB 0  
 LB 0.50 Hz  
 GB 0  
 PC 1.00

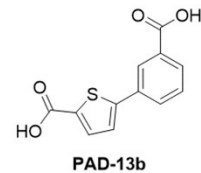

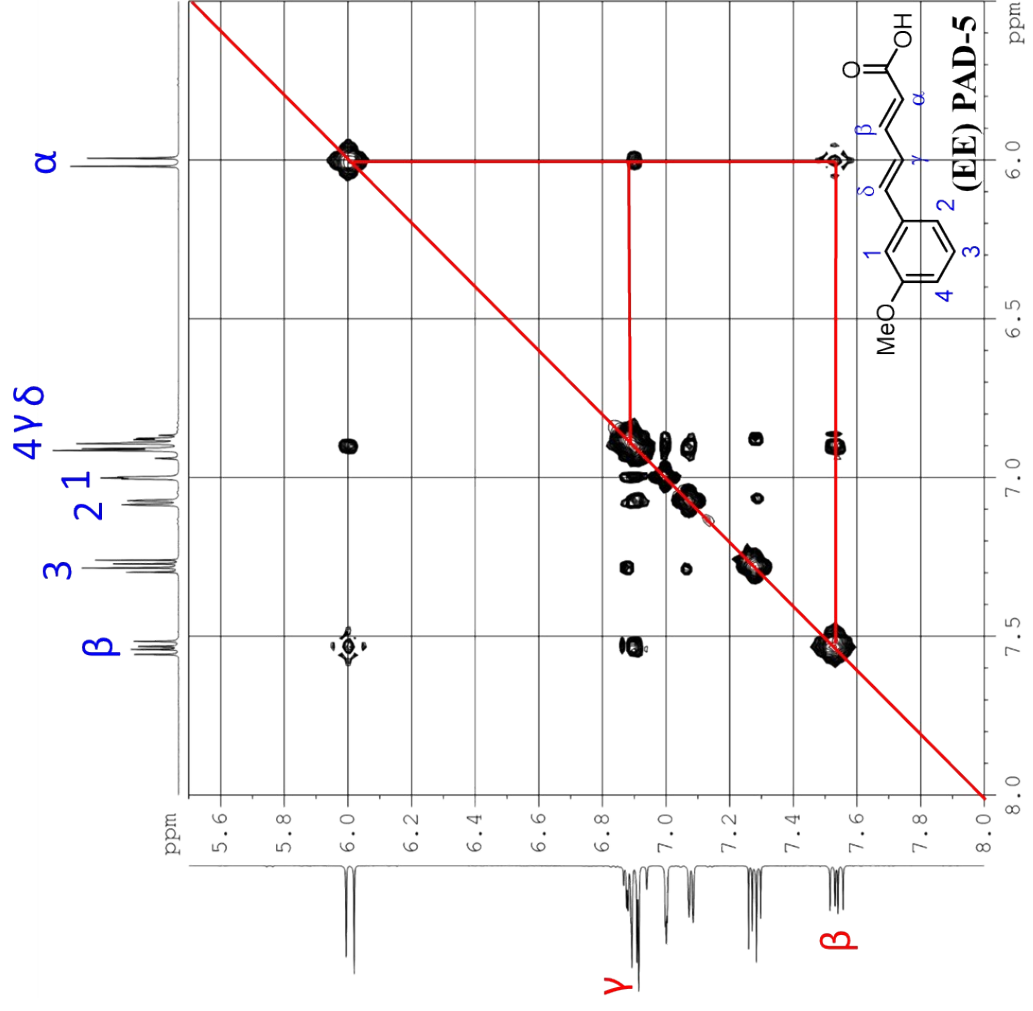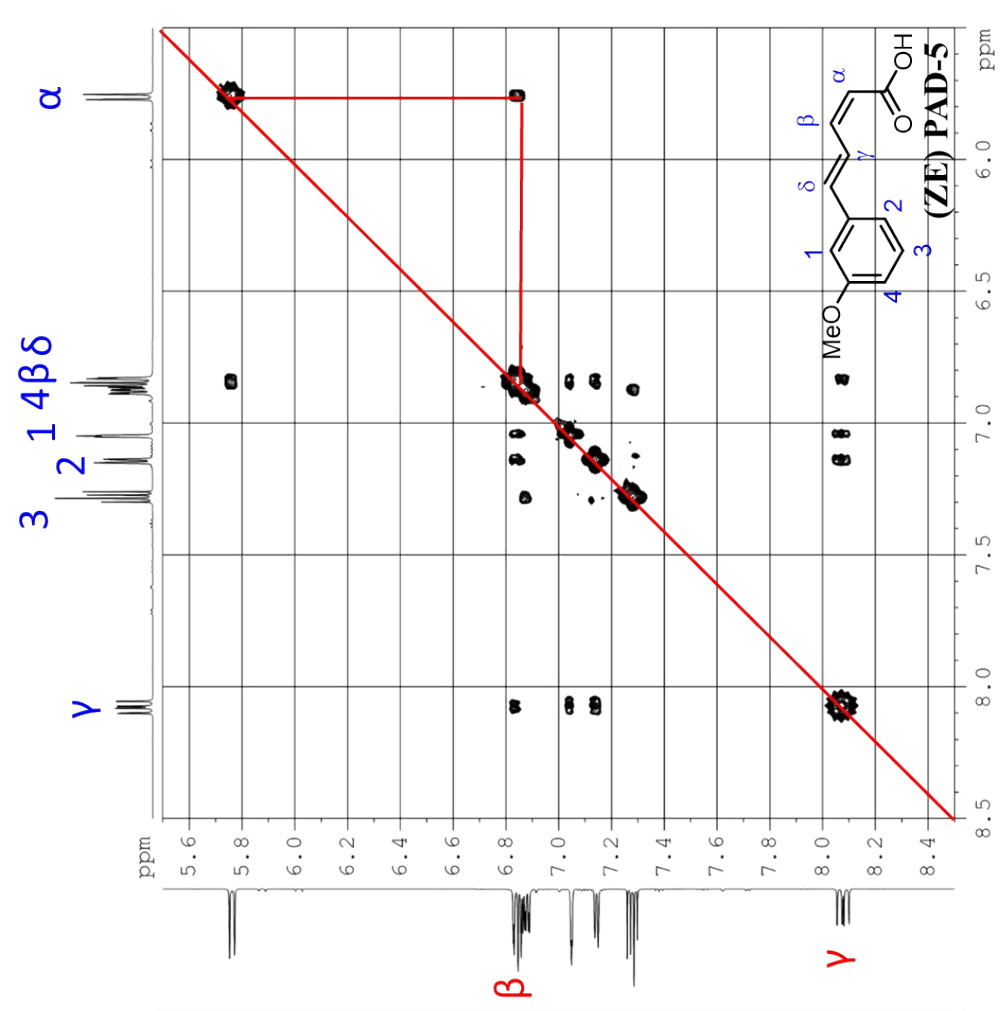

Supplement: d3cc03363e1.pdf [file d3cc03363e1.pdf]
